# Supplementary material for: Silver-mediated oxidative trifluoromethylthiolation of cycloalkanols by C–C bond cleavage: a regioselective approach to distally trifluoromethylthiolated ketones
Source: Royal Society of Chemistry journal article supplement (doi:10.1039/c6ra11968a), 2016-01-01

## *Supporting information*

### **Silver-mediated oxidative trifluoromethylthiolation of cycloalkanols by C-C bond cleavage: regioselective approach to distally trifluoromethylthiolated ketones**

Feng-Qing Huang, Yue-Wei Wang, Jian-Guo Sun, Jian Xie, Lian-Wen Qi,\*  
and Bo Zhang\*

*State Key Laboratory of Natural Medicines, China Pharmaceutical University,  
24 Tongjia Xiang, Nanjing 210009, China*

*E-mail: zb3981444@cpu.edu.cn; Qilw@cpu.edu.cn*

#### **Table of contents**

|                                                                                            |     |
|--------------------------------------------------------------------------------------------|-----|
| General                                                                                    | S2  |
| General procedure for silver-mediated oxidative trifluoromethylthiolation of cycloalkanols | S3  |
| Physical data of the compounds                                                             | S3  |
| Transformations of <b>2a</b>                                                               | S15 |
| Lager scale experiment                                                                     | S17 |
| Mechanistic studies                                                                        | S17 |
| References                                                                                 | S20 |
| NMR spectra                                                                                | S21 |

## General

All manipulations were conducted with a standard *Schlenk* tube under N<sub>2</sub>. All solvents and chemicals were used as received from the suppliers (*Alfa*, *Aldrich*, *Acros*, *TCI*).

Flash column chromatography was carried out on silica gel (200-300 mesh). Thin layer chromatography (TLC) was performed using silica gel 60 F<sub>254</sub> plates.

<sup>1</sup>H NMR spectra were recorded on a *Bruker AV-300* spectrometer or a *Bruker AV-500* spectrometer at room temperature. Chemical shifts (in ppm) were referenced to tetramethylsilane ( $\delta = 0$  ppm) in CDCl<sub>3</sub> as an internal standard. <sup>13</sup>C NMR spectra were obtained by the same NMR spectrometer and were calibrated with CDCl<sub>3</sub> ( $\delta = 77.00$  ppm). <sup>19</sup>F-NMR spectra were recorded on a *Bruker AV-300* spectrometer and using CFC<sub>3</sub> as external standard. Data for <sup>1</sup>H NMR are reported as follows: chemical shifts ( $\delta$  ppm), multiplicity (s = singlet, d = doublet, t = triplet, q = quartet, m = multiplet or unresolved, br s = broad singlet), coupling constant (Hz) and integration. Data for <sup>13</sup>C NMR are reported in terms of chemical shift and multiplicity where appropriate. Mass spectra were performed on an *Agilent 6530 Q-TOF* for HRMS. The yields were determined on a *METTLER TOLEDO ME 104* balance (accuracy: 0.1 mg).

Tertiary cyclopropanols **3a-3d** were prepared by the addition of Grignard reagent to the corresponding esters according to the reported method.<sup>[1]</sup> Tertiary cyclobutanols **1a-1n**, cyclopentanols **3e-3i**, and cyclohexanol **3j** were prepared by the addition of Grignard reagent to the corresponding ketones according to the reported method.<sup>[2]</sup>

**General procedure for silver-mediated oxidative trifluoromethylthiolation of cycloalkanols:**

**Method A:**

Cycloalkanol (0.25 mmol, 1.0 equiv), AgSCF<sub>3</sub> (0.625 mmol, 2.5 equiv), K<sub>2</sub>S<sub>2</sub>O<sub>8</sub> (0.75 mmol, 3.0 equiv), and pyridine (0.5 mmol, 2.0 equiv) were placed in a dry *Schlenk* tube under N<sub>2</sub>. Acetonitrile (2.5 mL) was added and the reaction mixture was stirred at 60 °C for 12 h. The reaction was monitored with TLC. The solvent was removed under reduced pressure and the residue was purified by silica gel column chromatography.

**Method B:**

Cycloalkanol (0.25 mmol, 1.0 equiv), AgSCF<sub>3</sub> (0.625 mmol, 2.5 equiv), and K<sub>2</sub>S<sub>2</sub>O<sub>8</sub> (0.75 mmol, 3.0 equiv) were placed in a dry *Schlenk* tube under N<sub>2</sub>. Acetonitrile (2.5 mL) was added and the reaction mixture was stirred at 60 °C for 12 h. The reaction was monitored with TLC. The solvent was removed under reduced pressure and the residue was purified by silica gel column chromatography.

**Method C:**

Cycloalkanol (0.25 mmol, 1.0 equiv), AgSCF<sub>3</sub> (0.625 mmol, 2.5 equiv), and K<sub>2</sub>S<sub>2</sub>O<sub>8</sub> (0.75 mmol, 3.0 equiv) were placed in a dry *Schlenk* tube under N<sub>2</sub>. Acetonitrile (2.5 mL) was added and the reaction mixture was stirred at 80 °C for 6 h. The reaction was monitored with TLC. The solvent was removed under reduced pressure and the residue was purified by silica gel column chromatography.

**Physical data of the compounds**

**1-(4-Chlorophenyl)-4-((trifluoromethyl)thio)butan-1-one (2a)**

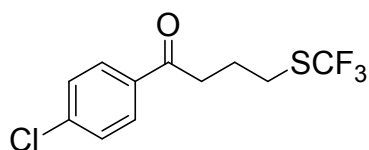

According to **Method A** with 1-(4-chlorophenyl)cyclobutanol **1a** (45.5 mg, 0.25 mmol, 1.0 equiv), AgSCF<sub>3</sub> (130.6 mg, 0.625 mmol, 2.5 equiv), K<sub>2</sub>S<sub>2</sub>O<sub>8</sub> (202.7 mg,

0.75 mmol, 3.0 equiv), and pyridine (40  $\mu$ L, 0.5 mmol, 2.0 equiv). Flash column chromatography (petroleum ether/Et<sub>2</sub>O = 50/1, v/v) gave the desired product **2a** as colourless oil (49.5 mg, 70%). **<sup>1</sup>H NMR** (500 MHz, CDCl<sub>3</sub>)  $\delta$  7.92-7.87 (m, 2H), 7.47-7.41 (m, 2H), 3.11 (t,  $J$  = 6.8 Hz, 2H), 3.02 (t,  $J$  = 7.0 Hz, 2H), 2.18-2.13 (m, 2H); **<sup>13</sup>C NMR** (125 MHz, CDCl<sub>3</sub>)  $\delta$  197.3, 139.8, 135.0, 131.0 (q,  $J_{C-F}$  = 304.1 Hz), 129.4, 129.0, 36.3, 29.3 (q,  $J_{C-F}$  = 2.0 Hz), 23.6; **<sup>19</sup>F NMR** (282 MHz, CDCl<sub>3</sub>)  $\delta$  -39.87; **HRMS** (ESI) calculated for C<sub>11</sub>H<sub>11</sub>ClF<sub>3</sub>OS [M+H]<sup>+</sup>  $m/z$  283.0166, found 283.0159.

#### 1-(4-Fluorophenyl)-4-((trifluoromethyl)thio)butan-1-one (**2b**)

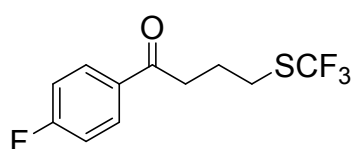

According to **Method A** with 1-(4-fluorophenyl)cyclobutanol **1b** (41.5 mg, 0.25 mmol, 1.0 equiv), AgSCF<sub>3</sub> (130.6 mg, 0.625 mmol, 2.5 equiv), K<sub>2</sub>S<sub>2</sub>O<sub>8</sub> (202.7 mg, 0.75 mmol, 3.0 equiv), and pyridine (40  $\mu$ L, 0.5 mmol, 2.0 equiv). Flash column chromatography (petroleum ether/Et<sub>2</sub>O = 50/1, v/v) gave the desired product **2b** as colourless oil (41.2 mg, 62%). **<sup>1</sup>H NMR** (500 MHz, CDCl<sub>3</sub>)  $\delta$  8.02-7.95 (m, 2H), 7.17-7.10 (m, 2H), 3.11 (t,  $J$  = 7.0 Hz, 2H), 3.02 (t,  $J$  = 7.0 Hz, 2H), 2.19-2.13 (m, 2H); **<sup>13</sup>C NMR** (75 MHz, CDCl<sub>3</sub>)  $\delta$  197.0, 165.9 (d,  $J$  = 253.3 Hz), 133.1 (d,  $J$  = 3.3 Hz), 131.0 (q,  $J$  = 304.1 Hz), 130.6 (d,  $J$  = 9.4 Hz), 115.8 (d,  $J$  = 22.0 Hz), 36.2, 29.4 (q,  $J$  = 2.0 Hz), 23.7; **<sup>19</sup>F NMR** (282 MHz, CDCl<sub>3</sub>)  $\delta$  -39.89, -103.83; **HRMS** (ESI) calculated for C<sub>11</sub>H<sub>11</sub>F<sub>4</sub>OS [M+H]<sup>+</sup>  $m/z$  267.0461, found 267.0464.

#### 1-(4-Bromophenyl)-4-((trifluoromethyl)thio)butan-1-one (**2c**)

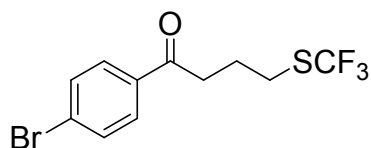

According to **Method A** with 1-(4-bromophenyl)cyclobutanol **1c** (56.5 mg, 0.25 mmol, 1.0 equiv), AgSCF<sub>3</sub> (130.6 mg, 0.625 mmol, 2.5 equiv), K<sub>2</sub>S<sub>2</sub>O<sub>8</sub> (202.7 mg, 0.75 mmol, 3.0 equiv), and pyridine (40  $\mu$ L, 0.5 mmol, 2.0 equiv). Flash column chromatography (petroleum ether/Et<sub>2</sub>O = 100/1, v/v) gave the desired product **2c** as colourless oil (50.3 mg, 62%). **<sup>1</sup>H NMR** (300 MHz, CDCl<sub>3</sub>)  $\delta$  7.87-7.79 (m, 2H), 7.67-7.59 (m, 2H), 3.10 (t,  $J$  = 6.8 Hz, 2H), 3.02 (t,  $J$  = 7.1 Hz, 2H), 2.20-2.11 (m, 2H); **<sup>13</sup>C NMR** (75 MHz, CDCl<sub>3</sub>)  $\delta$  197.5, 135.4, 132.0, 131.0 (q,  $J$  = 304.2 Hz),

129.5, 128.5, 36.3, 29.3 (q,  $J = 2.3$  Hz), 23.6;  $^{19}\text{F}$  NMR (282 MHz,  $\text{CDCl}_3$ )  $\delta$  -39.77; HRMS (ESI) calculated for  $\text{C}_{11}\text{H}_{11}\text{BrF}_3\text{OS}$   $[\text{M}+\text{H}]^+$   $m/z$  326.9661, found 326.9656.

#### 1-(4-(Trifluoromethyl)phenyl)-4-((trifluoromethyl)thio)butan-1-one (2d)

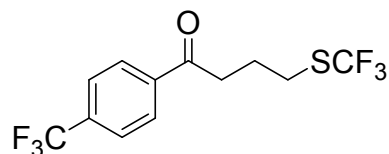

According to **Method A** with 1-(4-(trifluoromethyl)phenyl)cyclobutanol **1d** (54.0 mg, 0.25 mmol, 1.0 equiv),  $\text{AgSCF}_3$  (130.6 mg, 0.625 mmol, 2.5 equiv),  $\text{K}_2\text{S}_2\text{O}_8$  (202.7 mg, 0.75 mmol, 3.0 equiv), and pyridine (40  $\mu\text{L}$ , 0.5 mmol, 2.0 equiv). Flash column chromatography (petroleum ether/ $\text{Et}_2\text{O} = 100/1$ , v/v) gave the desired product **2d** as colourless oil (52.1 mg, 66%).  $^1\text{H}$  NMR (300 MHz,  $\text{CDCl}_3$ )  $\delta$  8.07 (d,  $J = 8.1$  Hz, 2H), 7.74 (d,  $J = 8.1$  Hz, 2H), 3.17 (t,  $J = 6.9$  Hz, 2H), 3.04 (t,  $J = 7.2$  Hz, 2H), 2.23-2.14 (m, 2H);  $^{13}\text{C}$  NMR (75 MHz,  $\text{CDCl}_3$ )  $\delta$  197.6, 139.3, 134.7 (q,  $J = 32.6$  Hz), 131.0 (q,  $J = 304.1$  Hz), 128.3, 125.8 (q,  $J = 3.7$  Hz), 123.3 (q,  $J = 271.2$  Hz), 36.6, 29.3 (q,  $J = 2.2$  Hz), 23.5;  $^{19}\text{F}$  NMR (282 MHz,  $\text{CDCl}_3$ )  $\delta$  -39.87, -62.12; HRMS (ESI) calculated for  $\text{C}_{12}\text{H}_{11}\text{F}_6\text{OS}$   $[\text{M}+\text{H}]^+$   $m/z$  317.0429, found 317.0428.

#### 1-(4-(Trifluoromethoxy)phenyl)-4-((trifluoromethyl)thio)butan-1-one (2e)

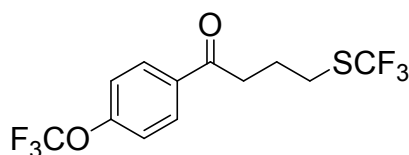

According to **Method A** with 1-(4-(trifluoromethoxy)phenyl)cyclobutanol **1e** (58.0 mg, 0.25 mmol, 1.0 equiv),  $\text{AgSCF}_3$  (130.6 mg, 0.625 mmol, 2.5 equiv),  $\text{K}_2\text{S}_2\text{O}_8$  (202.7 mg, 0.75 mmol, 3.0 equiv), and pyridine (40  $\mu\text{L}$ , 0.5 mmol, 2.0 equiv). Flash column chromatography (petroleum ether/ $\text{Et}_2\text{O} = 100/1$ , v/v) gave the desired product **2e** as colourless oil (57.2 mg, 69%).  $^1\text{H}$  NMR (500 MHz,  $\text{CDCl}_3$ )  $\delta$  8.04-7.98 (m, 2H), 7.30 (d,  $J = 8.0$  Hz, 2H), 3.13 (t,  $J = 6.8$  Hz, 2H), 3.03 (t,  $J = 7.3$  Hz, 2H), 2.19-2.14 (m, 2H);  $^{13}\text{C}$  NMR (75 MHz,  $\text{CDCl}_3$ )  $\delta$  197.0, 152.8 (q,  $J = 1.9$  Hz), 134.9, 131.0 (q,  $J = 304.2$  Hz), 130.0, 120.5, 120.3 (q,  $J = 257.4$  Hz), 36.3, 29.3 (q,  $J = 1.7$  Hz), 23.6;  $^{19}\text{F}$  NMR (282 MHz,  $\text{CDCl}_3$ )  $\delta$  -39.91, -56.60; HRMS (ESI) calculated for  $\text{C}_{12}\text{H}_{11}\text{F}_6\text{O}_2\text{S}$   $[\text{M}+\text{H}]^+$   $m/z$  333.0378, found 333.0380.

### 1-(4-(*tert*-Butyl)phenyl)-4-((trifluoromethyl)thio)butan-1-one (**2f**)

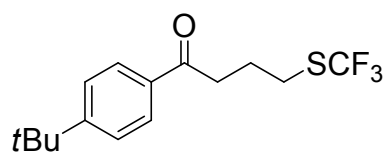

According to **Method A** with 1-(4-(*tert*-butyl)phenyl)cyclobutanol **1f** (51.0 mg, 0.25 mmol, 1.0 equiv), AgSCF<sub>3</sub> (130.6 mg, 0.625 mmol, 2.5 equiv), K<sub>2</sub>S<sub>2</sub>O<sub>8</sub> (202.7 mg, 0.75 mmol, 3.0 equiv), and pyridine (40 μL, 0.5 mmol, 2.0 equiv). Flash column chromatography (petroleum ether/Et<sub>2</sub>O = 100/1, v/v) gave the desired product **2f** as colourless oil (58.2 mg, 76%). **<sup>1</sup>H NMR** (300 MHz, CDCl<sub>3</sub>) δ 7.95-7.86 (m, 2H), 7.54-7.45 (m, 2H), 3.12 (t, *J* = 6.9 Hz, 2H), 3.02 (t, *J* = 7.1 Hz, 2H), 2.20-2.11(m, 2H), 1.35 (s, 9H); **<sup>13</sup>C NMR** (75 MHz, CDCl<sub>3</sub>) δ 198.3, 157.1, 134.1, 131.1 (q, *J* = 304.2 Hz), 128.0, 125.6, 36.3, 35.1, 31.0, 29.5 (q, *J* = 2.3 Hz), 23.8; **<sup>19</sup>F NMR** (282 MHz, CDCl<sub>3</sub>) δ -39.87; **HRMS** (ESI) calculated for C<sub>15</sub>H<sub>20</sub>F<sub>3</sub>OS [M+H]<sup>+</sup> *m/z* 305.1181, found 305.1190.

### 1-([1,1'-Biphenyl]-4-yl)-4-((trifluoromethyl)thio)butan-1-one (**2g**)

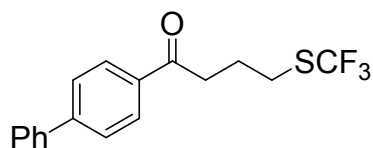

According to **Method A** with 1-([1,1'-biphenyl]-4-yl)cyclobutanol **1g** (56.0 mg, 0.25 mmol, 1.0 equiv), AgSCF<sub>3</sub> (130.6 mg, 0.625 mmol, 2.5 equiv), K<sub>2</sub>S<sub>2</sub>O<sub>8</sub> (202.7 mg, 0.75 mmol, 3.0 equiv), and pyridine (40 μL, 0.5 mmol, 2.0 equiv). Flash column chromatography (petroleum ether/Et<sub>2</sub>O = 100/1, v/v) gave the desired product **2g** as white solid (55.1 mg, 68%). **<sup>1</sup>H NMR** (500 MHz, CDCl<sub>3</sub>) δ 8.05-7.99 (m, 2H), 7.71-7.65 (m, 2H), 7.64-7.59 (m, 2H), 7.49-7.43 (m, 2H), 7.42-7.37 (m, 1H), 3.16 (t, *J* = 7.0 Hz, 2H), 3.04 (t, *J* = 7.0 Hz, 2H), 2.21-2.15 (m, 2H); **<sup>13</sup>C NMR** (75 MHz, CDCl<sub>3</sub>) δ 198.1, 146.0, 139.8, 135.4, 131.0 (q, *J* = 305.5 Hz), 129.0, 128.6, 128.3, 127.3, 127.2, 36.4, 29.4 (q, *J* = 2.3 Hz), 23.8; **<sup>19</sup>F NMR** (282 MHz, CDCl<sub>3</sub>) δ -39.82; **HRMS** (ESI) calculated for C<sub>17</sub>H<sub>16</sub>F<sub>3</sub>OS [M+H]<sup>+</sup> *m/z* 325.0868, found 325.0870.

### 1-(4-Phenoxyphenyl)-4-((trifluoromethyl)thio)butan-1-one (2h)

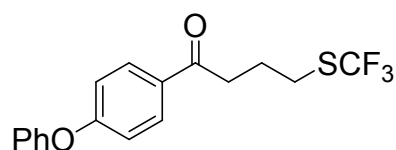

According to **Method A** with 1-(4-phenoxyphenyl)cyclobutanol **1h** (60.0 mg, 0.25 mmol, 1.0 equiv), AgSCF<sub>3</sub> (130.6 mg, 0.625 mmol, 2.5 equiv), K<sub>2</sub>S<sub>2</sub>O<sub>8</sub> (202.7 mg, 0.75 mmol, 3.0 equiv), and pyridine (40 μL, 0.5 mmol, 2.0 equiv). Flash column chromatography (petroleum ether/Et<sub>2</sub>O = 100/1, v/v) gave the desired product **2h** as colourless oil (49.7 mg, 58%). **<sup>1</sup>H NMR** (300 MHz, CDCl<sub>3</sub>) δ 7.97-7.89 (m, 2H), 7.43-7.34 (m, 2H), 7.23-7.16 (m, 1H), 7.10-7.04 (m, 2H), 7.03-6.97 (m, 2H), 3.09 (t, *J* = 6.9 Hz, 2H), 3.01 (t, *J* = 7.2 Hz, 2H), 2.19-2.10 (m, 2H); **<sup>13</sup>C NMR** (125 MHz, CDCl<sub>3</sub>) δ 197.1, 162.2, 155.5, 131.4, 131.0 (q, *J* = 304.4 Hz), 130.2, 130.1, 124.7, 120.2, 117.4, 36.1, 29.4, 23.8; **<sup>19</sup>F NMR** (282 MHz, CDCl<sub>3</sub>) δ -39.85; **HRMS** (ESI) calculated for C<sub>17</sub>H<sub>16</sub>F<sub>3</sub>O<sub>2</sub>S [M+H]<sup>+</sup> *m/z* 341.0818, found 341.0827.

### 1-(2-(Trifluoromethyl)phenyl)-4-((trifluoromethyl)thio)butan-1-one (2i)

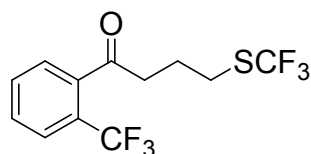

According to **Method A** with 1-(2-(trifluoromethyl)phenyl)cyclobutanol **1i** (54.0 mg, 0.25 mmol, 1.0 equiv), AgSCF<sub>3</sub> (130.6 mg, 0.625 mmol, 2.5 equiv), K<sub>2</sub>S<sub>2</sub>O<sub>8</sub> (202.7 mg, 0.75 mmol, 3.0 equiv), and pyridine (40 μL, 0.5 mmol, 2.0 equiv). Flash column chromatography (petroleum ether/Et<sub>2</sub>O = 50/1, v/v) gave the desired product **2i** as white solid (49.0 mg, 62%). **<sup>1</sup>H NMR** (300 MHz, CDCl<sub>3</sub>) δ 7.72 (d, *J* = 7.2 Hz, 1H), 7.65-7.54 (m, 2H), 7.42 (d, *J* = 7.2 Hz, 1H), 3.04-2.99 (m, 4H), 2.19-2.12 (m, 2H); **<sup>13</sup>C NMR** (75 MHz, CDCl<sub>3</sub>) δ 202.8, 140.0 (q, *J* = 2.2 Hz), 131.9, 131.0 (q, *J* = 303.8 Hz), 130.2, 126.9-126.7 (m), 123.6 (q, *J* = 272.0 Hz), 40.9, 29.0 (q, *J* = 2.2 Hz), 23.4; **<sup>19</sup>F NMR** (282 MHz, CDCl<sub>3</sub>) δ -39.88, -57.00; **HRMS** (ESI) calculated for C<sub>12</sub>H<sub>11</sub>F<sub>6</sub>OS [M+H]<sup>+</sup> *m/z* 317.0429, found 317.0434.

### 1-(3-Chlorophenyl)-4-((trifluoromethyl)thio)butan-1-one (2j)

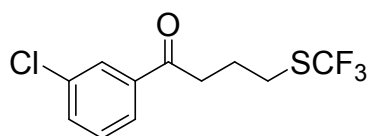

According to **Method A** with 1-(3-chlorophenyl)cyclobutanol **1j** (45.5 mg, 0.25 mmol, 1.0 equiv), AgSCF<sub>3</sub> (130.6 mg, 0.625 mmol, 2.5 equiv), K<sub>2</sub>S<sub>2</sub>O<sub>8</sub> (202.7 mg, 0.75 mmol, 3.0 equiv), and pyridine (40 μL, 0.5 mmol, 2.0 equiv). Flash column chromatography (petroleum ether/Et<sub>2</sub>O = 100/1, v/v) gave the desired product **2j** as colourless oil (50.1 mg, 71%). **<sup>1</sup>H NMR** (500 MHz, CDCl<sub>3</sub>) δ 7.92 (s, 1H), 7.83 (d, *J* = 7.5 Hz, 1H), 7.55 (d, *J* = 8.0 Hz, 1H), 7.45-7.38 (m, 1H), 3.12 (t, *J* = 6.8 Hz, 2H), 3.02 (t, *J* = 7.0 Hz, 2H), 2.19-2.13 (m, 2H); **<sup>13</sup>C NMR** (125 MHz, CDCl<sub>3</sub>) δ 197.3, 138.2, 135.1, 133.2, 131.0 (q, *J* = 304.4 Hz), 130.0, 128.1, 126.0, 36.5, 29.3, 23.6; **<sup>19</sup>F NMR** (282 MHz, CDCl<sub>3</sub>) δ -39.86; **HRMS** (ESI) calculated for C<sub>11</sub>H<sub>11</sub>ClF<sub>3</sub>OS [M+H]<sup>+</sup> *m/z* 283.0166, found 283.0168.

### 1-(3,4-Dichlorophenyl)-4-((trifluoromethyl)thio)butan-1-one (2k)

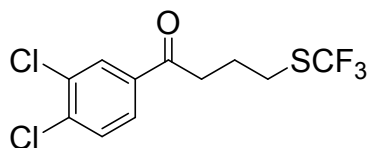

According to **Method A** with 1-(3,4-dichlorophenyl)cyclobutanol **1k** (54.0 mg, 0.25 mmol, 1.0 equiv), AgSCF<sub>3</sub> (130.6 mg, 0.625 mmol, 2.5 equiv), K<sub>2</sub>S<sub>2</sub>O<sub>8</sub> (202.7 mg, 0.75 mmol, 3.0 equiv), and pyridine (40 μL, 0.5 mmol, 2.0 equiv). Flash column chromatography (petroleum ether/Et<sub>2</sub>O = 100/1, v/v) gave the desired product **2k** as colourless oil (51.2 mg, 65%). **<sup>1</sup>H NMR** (300 MHz, CDCl<sub>3</sub>) δ 8.03 (d, *J* = 1.8 Hz, 1H), 7.78 (dd, *J* = 8.4, 2.1 Hz, 1H), 7.56 (d, *J* = 8.4 Hz, 1H), 3.10 (t, *J* = 6.9 Hz, 2H), 3.02 (t, *J* = 7.1 Hz, 2H), 2.20-2.11 (m, 2H); **<sup>13</sup>C NMR** (75 MHz, CDCl<sub>3</sub>) δ 196.3, 137.9, 136.2, 133.5, 131.0 (q, *J* = 304.4 Hz), 130.8, 130.0, 127.0, 36.4, 29.3 (q, *J* = 2.2 Hz), 23.5; **<sup>19</sup>F NMR** (282 MHz, CDCl<sub>3</sub>) δ -39.84; **HRMS** (ESI) calculated for C<sub>11</sub>H<sub>10</sub>Cl<sub>2</sub>F<sub>3</sub>OS [M+H]<sup>+</sup> *m/z* 316.9776, found 316.9778.

### 1-(Thiophen-2-yl)-4-((trifluoromethyl)thio)butan-1-one (2l)

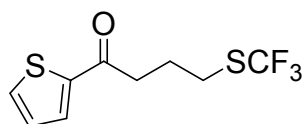



According to **Method A** with 1-(thiophen-2-yl)cyclobutanol **1l** (38.5 mg, 0.25 mmol, 1.0 equiv), AgSCF<sub>3</sub> (130.6 mg, 0.625 mmol, 2.5 equiv), K<sub>2</sub>S<sub>2</sub>O<sub>8</sub> (202.7 mg, 0.75 mmol, 3.0 equiv), and pyridine (40 μL, 0.5 mmol, 2.0 equiv). Flash column chromatography (petroleum ether/Et<sub>2</sub>O = 50/1, v/v) gave the desired product **2l** as colourless oil (38.4 mg, 60%). **<sup>1</sup>H NMR** (300 MHz, CDCl<sub>3</sub>) δ 7.73 (d, *J* = 3.9 Hz, 1H), 7.65 (d, *J* = 4.8 Hz, 1H), 7.16-7.13 (m, 1H), 3.08 (t, *J* = 6.9 Hz, 2H), 3.02 (t, *J* = 7.2 Hz, 2H), 2.21-2.11 (m, 2H); **<sup>13</sup>C NMR** (125 MHz, CDCl<sub>3</sub>) δ 191.5, 143.9, 133.8, 131.9, 131.0 (q, *J* = 304.1 Hz), 128.2, 37.1, 29.3, 24.0; **<sup>19</sup>F NMR** (282 MHz, CDCl<sub>3</sub>) δ -39.85; **HRMS** (ESI) calculated for C<sub>9</sub>H<sub>10</sub>F<sub>3</sub>OS<sub>2</sub> [M+H]<sup>+</sup> *m/z* 255.0120, found 255.0123.

### 1-Phenyl-4-((trifluoromethyl)thio)butan-1-one (**2m**)

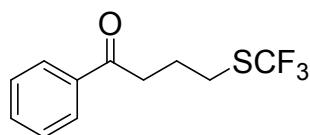

According to **Method A** with 1-phenylcyclobutanol **1m** (37.0 mg, 0.25 mmol, 1.0 equiv), AgSCF<sub>3</sub> (130.6 mg, 0.625 mmol, 2.5 equiv), K<sub>2</sub>S<sub>2</sub>O<sub>8</sub> (202.7 mg, 0.75 mmol, 3.0 equiv), and pyridine (40 μL, 0.5 mmol, 2.0 equiv). Flash column chromatography (petroleum ether/Et<sub>2</sub>O = 50/1, v/v) gave the desired product **2m** as colourless oil (40.2 mg, 65%). **<sup>1</sup>H NMR** (300 MHz, CDCl<sub>3</sub>) δ 7.96 (d, *J* = 7.2 Hz, 2H), 7.62-7.55 (m, 1H), 7.52-7.42 (m, 2H), 3.14 (t, *J* = 6.9 Hz, 2H), 3.03 (t, *J* = 7.1 Hz, 2H), 2.21-2.12 (m, 2H); **<sup>13</sup>C NMR** (125 MHz, CDCl<sub>3</sub>) δ 198.6, 136.7, 133.3, 131.1 (q, *J* = 304.4 Hz), 128.7, 128.0, 36.4, 29.4, 23.7; **<sup>19</sup>F NMR** (282 MHz, CDCl<sub>3</sub>) δ -39.87; **HRMS** (ESI) calculated for C<sub>11</sub>H<sub>12</sub>F<sub>3</sub>OS [M+H]<sup>+</sup> *m/z* 249.0555, found 249.0563.

### 1-Cyclohexyl-4-((trifluoromethyl)thio)butan-1-one (**2n**)

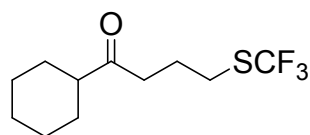

According to **Method A** with 1-cyclohexylcyclobutanol **1n** (38.5 mg, 0.25 mmol, 1.0 equiv), AgSCF<sub>3</sub> (130.6 mg, 0.625 mmol, 2.5 equiv), K<sub>2</sub>S<sub>2</sub>O<sub>8</sub> (202.7 mg, 0.75 mmol, 3.0 equiv), and pyridine (40 μL, 0.5 mmol, 2.0 equiv). Flash column chromatography (petroleum ether/Et<sub>2</sub>O = 100/1, v/v) gave the desired product **2n** as colourless oil (25.3 mg, 40%). **<sup>1</sup>H NMR** (500 MHz, CDCl<sub>3</sub>) δ 2.91 (d, *J* = 7.3 Hz, 2H), 2.59 (d, *J* = 6.8 Hz, 2H), 2.36-2.30 (m, 1H), 1.99-1.93 (m, 2H), 1.84-1.77 (m, 4H), 1.69-1.66 (m,

1H), 1.38-1.19 (m, 5H);  $^{13}\text{C}$  NMR (125 MHz,  $\text{CDCl}_3$ )  $\delta$  212.5, 131.0 (q,  $J = 304.4$  Hz), 50.9, 38.2, 29.3, 28.5, 25.8, 25.6, 23.2;  $^{19}\text{F}$  NMR (282 MHz,  $\text{CDCl}_3$ )  $\delta$  -41.06; HRMS (ESI) calculated for  $\text{C}_{11}\text{H}_{18}\text{F}_3\text{OS}$   $[\text{M}+\text{H}]^+$   $m/z$  255.1030, found 255.1026.

#### 1-(4-Chlorophenyl)-4-((trifluoromethyl)thio)butan-2-one (4a)

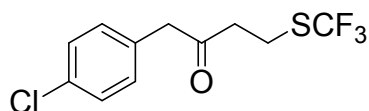

According to **Method B** with 1-(4-chlorobenzyl)cyclopropanol **3a** (45.5 mg, 0.25 mmol, 1.0 equiv),  $\text{AgSCF}_3$  (130.6 mg, 0.625 mmol, 2.5 equiv), and  $\text{K}_2\text{S}_2\text{O}_8$  (202.7 mg, 0.75 mmol, 3.0 equiv). Flash column chromatography (petroleum ether/ $\text{Et}_2\text{O} = 50/1$ , v/v) gave the desired product **4a** as colourless oil (31.5 mg, 45%).  $^1\text{H}$  NMR (500 MHz,  $\text{CDCl}_3$ )  $\delta$  7.34-7.29 (m, 2H), 7.15-7.10 (m, 2H), 3.69 (s, 2H), 3.04 (t,  $J = 6.8$  Hz, 2H), 2.89 (t,  $J = 7.0$  Hz, 2H);  $^{13}\text{C}$  NMR (125 MHz,  $\text{CDCl}_3$ )  $\delta$  204.5, 133.4, 131.8, 131.1 (q,  $J = 304.7$  Hz), 130.7, 129.0, 49.2, 42.0, 23.4;  $^{19}\text{F}$  NMR (282 MHz,  $\text{CDCl}_3$ )  $\delta$  -40.43; HRMS (ESI) calculated for  $\text{C}_{11}\text{H}_{10}\text{ClF}_3\text{NaOS}$   $[\text{M}+\text{Na}]^+$   $m/z$  304.9991, found 304.9995.

#### 1-(4-(*tert*-Butyl)phenyl)-4-((trifluoromethyl)thio)butan-2-one (4b)

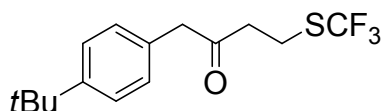

According to **Method B** with 1-(4-(*tert*-butyl)benzyl)cyclopropanol **3b** (51.0 mg, 0.25 mmol, 1.0 equiv),  $\text{AgSCF}_3$  (130.6 mg, 0.625 mmol, 2.5 equiv), and  $\text{K}_2\text{S}_2\text{O}_8$  (202.7 mg, 0.75 mmol, 3.0 equiv). Flash column chromatography (petroleum ether/ $\text{Et}_2\text{O} = 100/1$ , v/v) gave the desired product **4b** as colourless oil (33.4 mg, 44%).  $^1\text{H}$  NMR (500 MHz,  $\text{CDCl}_3$ )  $\delta$  7.38-7.33 (m, 2H), 7.15-7.10 (m, 2H), 3.68 (s, 2H), 3.03 (t,  $J = 6.8$  Hz, 2H), 2.87 (t,  $J = 6.8$  Hz, 2H), 1.31 (s, 9H);  $^{13}\text{C}$  NMR (125 MHz,  $\text{CDCl}_3$ )  $\delta$  205.5, 150.3, 130.3, 131.1 (q,  $J = 304.4$  Hz), 129.0, 125.8, 49.7, 41.7, 34.5, 31.3, 23.5;  $^{19}\text{F}$  NMR (282 MHz,  $\text{CDCl}_3$ )  $\delta$  -40.48; HRMS (ESI) calculated for  $\text{C}_{15}\text{H}_{19}\text{F}_3\text{NaOS}$   $[\text{M}+\text{Na}]^+$   $m/z$  327.1006, found 327.1006.

#### 1-Phenyl-5-((trifluoromethyl)thio)pentan-3-one (4c)<sup>[3]</sup>

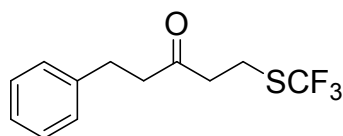

According to **Method B** with 1-phenethylcyclopropanol **3c** (40.5 mg, 0.25 mmol, 1.0 equiv), AgSCF<sub>3</sub> (130.6 mg, 0.625 mmol, 2.5 equiv), and K<sub>2</sub>S<sub>2</sub>O<sub>8</sub> (202.7 mg, 0.75 mmol, 3.0 equiv). Flash column chromatography (petroleum ether/Et<sub>2</sub>O = 80/1, v/v) gave the desired product **4c** as colourless oil (23.2 mg, 35%). **<sup>1</sup>H NMR** (500 MHz, CDCl<sub>3</sub>) δ 7.32-7.24 (m, 2H), 7.21-7.16 (m, 3H), 3.05 (t, *J* = 6.8 Hz, 2H), 2.92 (t, *J* = 7.5 Hz, 2H), 2.81 (t, *J* = 6.5 Hz, 2H), 2.76 (t, *J* = 7.5 Hz, 2H); **<sup>13</sup>C NMR** (125 MHz, CDCl<sub>3</sub>) δ 206.7, 140.5, 131.1 (q, *J* = 304.4 Hz), 128.6, 128.3, 126.3, 44.3, 42.8, 29.6, 23.3 (q, *J* = 1.9 Hz); **<sup>19</sup>F NMR** (282 MHz, CDCl<sub>3</sub>) δ -40.43; **HRMS** (ESI) calculated for C<sub>12</sub>H<sub>13</sub>F<sub>3</sub>NaOS [M+Na]<sup>+</sup> *m/z* 285.0537, found 285.0537.

### 1-Phenyl-5-((trifluoromethyl)thio)heptan-3-one (**4d**)

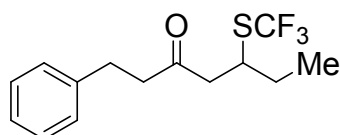

According to **Method C** with 2-ethyl-1-phenethylcyclopropanol **3d** (47.5 mg, 0.25 mmol, 1.0 equiv), AgSCF<sub>3</sub> (130.6 mg, 0.625 mmol, 2.5 equiv), and K<sub>2</sub>S<sub>2</sub>O<sub>8</sub> (202.7 mg, 0.75 mmol, 3.0 equiv). Flash column chromatography (petroleum ether/Et<sub>2</sub>O = 100/1, v/v) gave the desired product **4d** as colourless oil (25.2mg, 35%). **<sup>1</sup>H NMR** (500 MHz, CDCl<sub>3</sub>) δ 7.32-7.27 (m, 2H), 7.24-7.17 (m, 3H), 3.56-3.51 (m, 1H), 2.94-2.85 (m, 3H), 2.80-2.74 (m, 3H), 1.77-1.64 (m, 2H), 1.01 (t, *J* = 7.3Hz, 3H); **<sup>13</sup>C NMR** (125 MHz, CDCl<sub>3</sub>) δ 206.4, 140.6, 131.1 (q, *J* = 304.7 Hz), 128.5, 128.3, 126.2, 48.2, 44.7, 42.4, 29.6, 27.9, 11.1; **<sup>19</sup>F NMR** (282 MHz, CDCl<sub>3</sub>) δ -38.22; **HRMS** (ESI) calculated for C<sub>14</sub>H<sub>18</sub>F<sub>3</sub>OS [M+H]<sup>+</sup> *m/z* 291.1031, found 291.1024.

### 1-Phenyl-5-((trifluoromethyl)thio)pentan-1-one (**4e**)

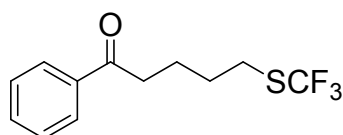

According to **Method A** with 1-phenylcyclopentanol **3e** (40.5 mg, 0.25 mmol, 1.0 equiv), AgSCF<sub>3</sub> (130.6 mg, 0.625 mmol, 2.5 equiv), K<sub>2</sub>S<sub>2</sub>O<sub>8</sub> (202.7 mg, 0.75 mmol, 3.0 equiv), and pyridine (40 μL, 0.5 mmol, 2.0 equiv). Flash column chromatography (petroleum ether/Et<sub>2</sub>O = 80/1, v/v) gave the desired product **4e** as colourless oil (33.4 mg, 51%). **<sup>1</sup>H NMR** (500 MHz, CDCl<sub>3</sub>) δ 7.97-7.93 (m, 2H), 7.59-7.54 (m, 1H), 7.49-7.44 (m, 2H), 3.01 (t, *J* = 7.0 Hz, 2H), 2.93 (t, *J* = 7.3 Hz, 2H), 1.90-1.84 (m, 2H), 1.83-1.78 (m, 2H); **<sup>13</sup>C NMR** (125 MHz, CDCl<sub>3</sub>) δ 199.4, 136.9, 133.1, 131.1 (q,

$J = 304.1$  Hz), 128.6, 128.0, 37.6, 29.7, 29.1, 22.9;  $^{19}\text{F}$  NMR (282 MHz,  $\text{CDCl}_3$ )  $\delta$  -40.07; HRMS (ESI) calculated for  $\text{C}_{12}\text{H}_{13}\text{F}_3\text{NaOS}$   $[\text{M}+\text{Na}]^+$   $m/z$  285.0537, found 285.0538.

#### 1-(4-Chlorophenyl)-5-((trifluoromethyl)thio)pentan-1-one (4f)

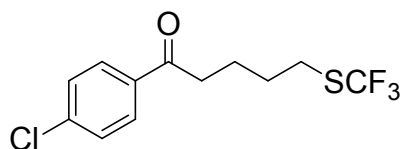

According to **Method A** with 1-phenylcyclopentanol **3f** (49.0 mg, 0.25 mmol, 1.0 equiv),  $\text{AgSCF}_3$  (130.6 mg, 0.625 mmol, 2.5 equiv),  $\text{K}_2\text{S}_2\text{O}_8$  (202.7 mg, 0.75 mmol, 3.0 equiv), and pyridine (40  $\mu\text{L}$ , 0.5 mmol, 2.0 equiv). Flash column chromatography (petroleum ether/ $\text{Et}_2\text{O} = 100/1$ , v/v) gave the desired product **4f** as colourless oil (31.2 mg, 42%).  $^1\text{H}$  NMR (500 MHz,  $\text{CDCl}_3$ )  $\delta$  7.93-7.86 (m, 2H), 7.48-7.41 (m, 2H), 2.98 (t,  $J = 7.0$  Hz, 2H), 2.93 (t,  $J = 7.0$  Hz, 2H), 1.89-1.84 (m, 2H); 1.82-1.78 (m, 2H);  $^{13}\text{C}$  NMR (125 MHz,  $\text{CDCl}_3$ )  $\delta$  198.0, 139.6, 135.1, 131.1 (q,  $J = 304.1$  Hz), 129.4, 128.9, 37.6, 29.7, 29.0, 22.8;  $^{19}\text{F}$  NMR (282 MHz,  $\text{CDCl}_3$ )  $\delta$  -40.06; HRMS (ESI) calculated for  $\text{C}_{12}\text{H}_{13}\text{ClF}_3\text{OS}$   $[\text{M}+\text{H}]^+$   $m/z$  297.0328, found 297.0327.

#### 1-(4-(Trifluoromethoxy)phenyl)-5-((trifluoromethyl)thio)pentan-1-one (4g)

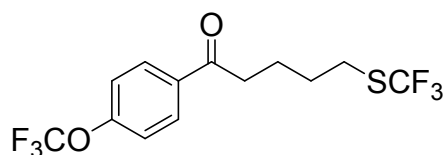

According to **Method A** with 1-(4-(trifluoromethoxy)phenyl)cyclopentanol **3g** (61.5 mg, 0.25 mmol, 1.0 equiv),  $\text{AgSCF}_3$  (130.6 mg, 0.625 mmol, 2.5 equiv),  $\text{K}_2\text{S}_2\text{O}_8$  (202.7 mg, 0.75 mmol, 3.0 equiv), and pyridine (40  $\mu\text{L}$ , 0.5 mmol, 2.0 equiv). Flash column chromatography (petroleum ether/ $\text{Et}_2\text{O} = 100/1$ , v/v) gave the desired product **4g** as colourless oil (49.4 mg, 57%).  $^1\text{H}$  NMR (500 MHz,  $\text{CDCl}_3$ )  $\delta$  8.03-7.97 (m, 2H), 7.29 (d,  $J = 8.5$  Hz, 2H), 3.00 (t,  $J = 7.0$  Hz, 2H), 2.94 (t,  $J = 7.0$  Hz, 2H), 1.89-1.85 (m, 2H), 1.83-1.78 (m, 2H);  $^{13}\text{C}$  NMR (125 MHz,  $\text{CDCl}_3$ )  $\delta$  197.7, 152.7, 135.1, 131.1 (q,  $J = 303.8$  Hz), 130.0, 120.5, 120.3 (q,  $J = 257.1$  Hz), 37.7, 29.7, 29.1, 22.8;  $^{19}\text{F}$  NMR (282 MHz,  $\text{CDCl}_3$ )  $\delta$  -40.08, -56.56; HRMS (ESI) calculated for  $\text{C}_{13}\text{H}_{13}\text{F}_6\text{O}_2\text{S}$   $[\text{M}+\text{H}]^+$   $m/z$  347.0540, found 347.0546.

### 1-(4-(*tert*-Butyl)phenyl)-5-((trifluoromethyl)thio)pentan-1-one (4h)

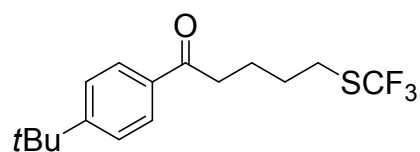

According to **Method A** with 1-(4-(*tert*-butyl)phenyl)cyclopentanol **3h** (54.5 mg, 0.25 mmol, 1.0 equiv), AgSCF<sub>3</sub> (130.6 mg, 0.625 mmol, 2.5 equiv), K<sub>2</sub>S<sub>2</sub>O<sub>8</sub> (202.7 mg, 0.75 mmol, 3.0 equiv), and pyridine (40 μL, 0.5 mmol, 2.0 equiv). Flash column chromatography (petroleum ether/Et<sub>2</sub>O = 100/1, v/v) gave the desired product **4h** as colourless oil (35.3 mg, 44%). **<sup>1</sup>H NMR** (500 MHz, CDCl<sub>3</sub>) δ 7.91-7.86 (m, 2H), 7.50-7.45 (m, 2H), 2.99 (t, *J* = 6.8 Hz, 2H), 2.93 (t, *J* = 7.0 Hz, 2H), 1.89-1.84 (m, 2H), 1.82-1.77 (m, 2H), 1.34 (s, 9H); **<sup>13</sup>C NMR** (125 MHz, CDCl<sub>3</sub>) δ 199.0, 156.9, 134.3, 131.1 (q, *J* = 304.1 Hz), 128.0, 125.5, 37.5, 35.1, 31.0, 29.7, 29.1, 23.0; **<sup>19</sup>F NMR** (282 MHz, CDCl<sub>3</sub>) δ -40.07; **HRMS** (ESI) calculated for C<sub>16</sub>H<sub>22</sub>F<sub>3</sub>OS [M+H]<sup>+</sup> *m/z* 319.1344, found 319.1338.

### 1-(3-Chlorophenyl)-5-((trifluoromethyl)thio)pentan-1-one (4i)

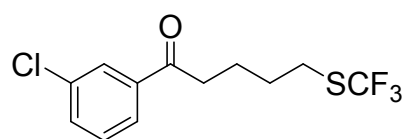

According to **Method A** with 1-(3-chlorophenyl)cyclopentanol **3i** (49.0 mg, 0.25 mmol, 1.0 equiv), AgSCF<sub>3</sub> (130.6 mg, 0.625 mmol, 2.5 equiv), K<sub>2</sub>S<sub>2</sub>O<sub>8</sub> (202.7 mg, 0.75 mmol, 3.0 equiv), and pyridine (40 μL, 0.5 mmol, 2.0 equiv). Flash column chromatography (petroleum ether/Et<sub>2</sub>O = 100/1, v/v) gave the desired product **4i** as colourless oil (46.7 mg, 63%). **<sup>1</sup>H NMR** (500 MHz, CDCl<sub>3</sub>) δ 7.91 (s, 1H), 7.82 (d, *J* = 7.5 Hz, 1H), 7.53 (d, *J* = 7.5 Hz, 1H), 7.44-7.38 (m, 1H), 2.99 (t, *J* = 6.8 Hz, 2H), 2.93 (t, *J* = 7.3 Hz, 2H), 1.89-1.84 (m, 2H), 1.82-1.76 (m, 2H); **<sup>13</sup>C NMR** (125 MHz, CDCl<sub>3</sub>) δ 198.0, 138.4, 135.0, 133.0, 131.1 (q, *J* = 304.1 Hz), 130.0, 128.1, 126.0, 37.8, 29.7, 29.0, 22.7; **<sup>19</sup>F NMR** (282 MHz, CDCl<sub>3</sub>) δ -40.05; **HRMS** (ESI) calculated for C<sub>12</sub>H<sub>13</sub>ClF<sub>3</sub>OS [M+H]<sup>+</sup> *m/z* 297.0328, found 297.0334.

### 1-(4-Chlorophenyl)-6-((trifluoromethyl)thio)hexan-1-one (4j)

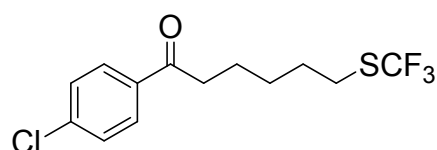

According to **Method A** with 1-(4-chlorophenyl)cyclohexanol **3j** (52.5 mg, 0.25 mmol, 1.0 equiv), AgSCF<sub>3</sub> (130.6 mg, 0.625 mmol, 2.5 equiv), K<sub>2</sub>S<sub>2</sub>O<sub>8</sub> (202.7 mg, 0.75 mmol, 3.0 equiv), and pyridine (40 μL, 0.5 mmol, 2.0 equiv). Flash column chromatography (petroleum ether/Et<sub>2</sub>O = 100/1, v/v) gave the desired product **4j** as colourless oil (24.1 mg, 31%). **<sup>1</sup>H NMR** (500 MHz, CDCl<sub>3</sub>) δ 7.93-7.86 (m, 2H), 7.50-7.40 (m, 2H), 2.95 (t, *J* = 7.0 Hz, 2H), 2.90 (t, *J* = 7.5 Hz, 2H), 1.80-1.72 (m, 4H), 1.53-1.48 (m, 2H); **<sup>13</sup>C NMR** (125 MHz, CDCl<sub>3</sub>) δ 198.6, 139.5, 135.3, 131.2 (q, *J* = 303.8 Hz), 129.4, 128.9, 38.1, 29.6 (q, *J* = 2.0 Hz), 29.3, 28.0, 23.4; **<sup>19</sup>F NMR** (282 MHz, CDCl<sub>3</sub>) δ -40.07; **HRMS** (ESI) calculated for C<sub>13</sub>H<sub>14</sub>ClF<sub>3</sub>NaOS [M+Na]<sup>+</sup>  
m/z                                      333.0304,                                      found                                      333.0300.

## Transformations of 2a

### (5-(4-Chlorophenyl)pent-4-yn-1-yl)(trifluoromethyl)sulfane (5)

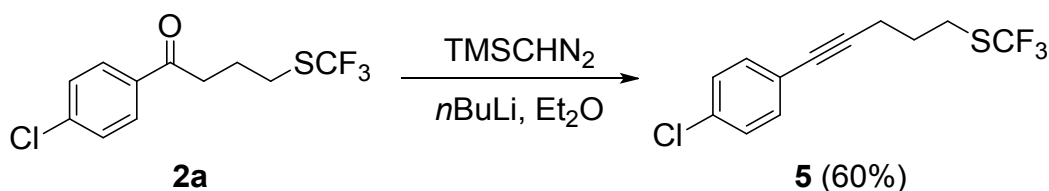

To a solution of (trimethylsilyl)diazomethane (0.30 mL, 0.6 mmol, 2 M in hexanes) in Et<sub>2</sub>O (4 mL), *n*BuLi (0.38 mL, 0.6 mmol, 1.6 M in hexane) was added dropwise at -78 °C. After the mixture was stirred for 1 h at -78 °C, a solution of **2a** (84.6 mg, 0.3 mmol) in THF (2 mL) was added dropwise at 0 °C. The reaction mixture was stirred for another 5 h. After it was quenched with saturated aqueous ammonium chloride (5 mL), the aqueous phase was extracted with EtOAc (3×10 mL). The combined organic extracts were dried over MgSO<sub>4</sub> and concentrated in vacuo. The residue was purified by flash column chromatography (petroleum ether/Et<sub>2</sub>O = 100/1, v/v) on silica gel to give product **5** (50.1 mg, 60%) as colorless oil. <sup>1</sup>H NMR (500 MHz, CDCl<sub>3</sub>) δ 7.31-7.30 (m, 2H), 7.27-7.25 (m, 2H), 3.05 (t, *J* = 7.0 Hz, 2H), 2.56 (t, *J* = 6.5 Hz, 2H), 2.02-1.98 (m, 2H); <sup>13</sup>C NMR (125 MHz, CDCl<sub>3</sub>) δ 133.9, 132.8, 131.1 (q, *J* = 304.1 Hz), 128.6, 122.0, 88.8, 80.9, 28.8 (q, *J* = 2.0 Hz), 28.4, 18.2; <sup>19</sup>F NMR (282 MHz, CDCl<sub>3</sub>) δ -39.91; HRMS (ESI) calculated for C<sub>12</sub>H<sub>11</sub>ClF<sub>3</sub>S [M+H]<sup>+</sup> *m/z* 279.0222, found 279.0224.

### 3-(4-Chlorophenyl)-6-((trifluoromethyl)thio)-1-(trimethylsilyl)hex-1-yn-3-ol (6)

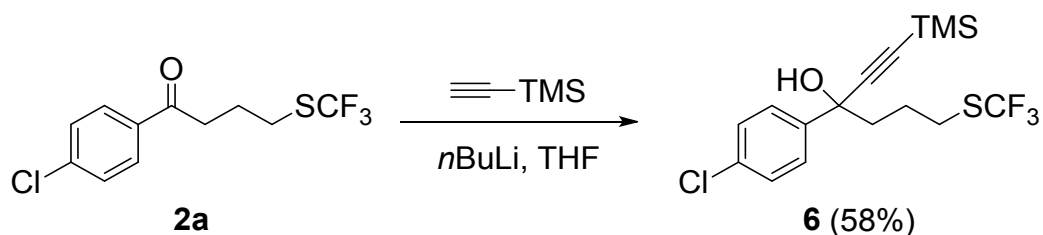

To a solution of trimethylsilylacetylene (58.9 mg, 0.6 mmol) in THF (1 mL), *n*BuLi (0.38 mL, 0.6 mmol, 1.6 M in hexane) was added dropwise at -78 °C. After the mixture was stirred for 1 h at room temperature, a solution of **2a** (84.6 mg, 0.3 mmol) in THF (2 mL) was added dropwise at -78 °C. The reaction mixture was warmed up to room temperature gradually and further stirred for overnight. The reaction mixture was quenched with saturated aqueous ammonium chloride (5 mL). The aqueous phase was extracted with EtOAc (2×10 mL). The combined organic extracts were dried over

MgSO<sub>4</sub> and concentrated in vacuo. The residue was purified by flash column chromatography (petroleum ether/Et<sub>2</sub>O = 100/1, v/v) on silica gel to give product **6** (65.6 mg, 58%) as colorless oil. <sup>1</sup>H NMR (500 MHz, CDCl<sub>3</sub>) δ 7.55-7.51 (m, 2H), 7.35-7.30 (m, 2H), 2.94-2.84 (m, 2H), 2.37 (br s, 1H), 2.01-1.75 (m, 4H), 0.22 (s, 9H); <sup>13</sup>C NMR (125 MHz, CDCl<sub>3</sub>) δ 142.8, 133.8, 131.1 (q, *J* = 304.4 Hz), 128.4, 126.9, 106.6, 91.9, 72.7, 43.7, 29.7, 25.0, 0.3; <sup>19</sup>F NMR (282 MHz, CDCl<sub>3</sub>) δ -39.99; HRMS (ESI) calculated for C<sub>16</sub>H<sub>21</sub>ClF<sub>3</sub>OSSi [M+H]<sup>+</sup> m/z 381.0723, found 381.0724.

#### 1-(4-Chlorophenyl)-4-((trifluoromethyl)thio)butan-1-ol (**7**)

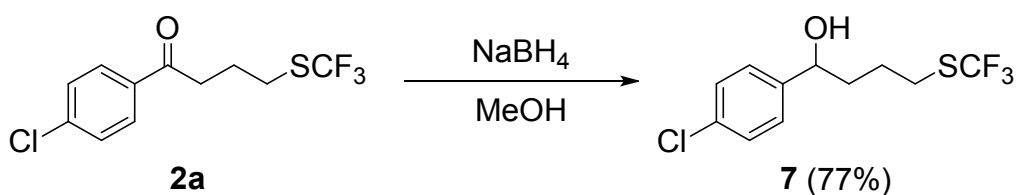

To a stirred solution of **2a** (84.6 mg, 0.3 mmol) in MeOH (2 mL), NaBH<sub>4</sub> (22.7 mg, 0.6 mmol) was added in one portion at 0 °C. The reaction mixture was stirred for 30 min. After it was quenched by saturated aqueous ammonium chloride (3 mL), the mixture was extracted with EtOAc (5 mL × 3). The combined organic layer was dried over MgSO<sub>4</sub> and concentrated in vacuo. The crude residue was purified by flash column chromatography (petroleum ether/Et<sub>2</sub>O = 10/1, v/v) on silica gel to afford product **7** (65.5 mg, 77%) as colorless oil. <sup>1</sup>H NMR (500 MHz, CDCl<sub>3</sub>) δ 7.34-7.28 (m, 2H), 7.28-7.22 (m, 2H), 4.69-4.62 (m, 1H), 2.89-2.87 (m, 2H), 2.02 (br s, 1H), 1.87-1.68 (m, 4H); <sup>13</sup>C NMR (125 MHz, CDCl<sub>3</sub>) δ 142.7, 133.5, 131.1 (q, *J* = 304.1 Hz), 128.7, 127.1, 73.2, 37.5, 29.7, 25.7; <sup>19</sup>F NMR (282 MHz, CDCl<sub>3</sub>) δ -40.03; HRMS (ESI) calculated for C<sub>11</sub>H<sub>13</sub>ClF<sub>3</sub>OS [M+H]<sup>+</sup> m/z 285.0328, found 285.0332.



### Larger scale experiment

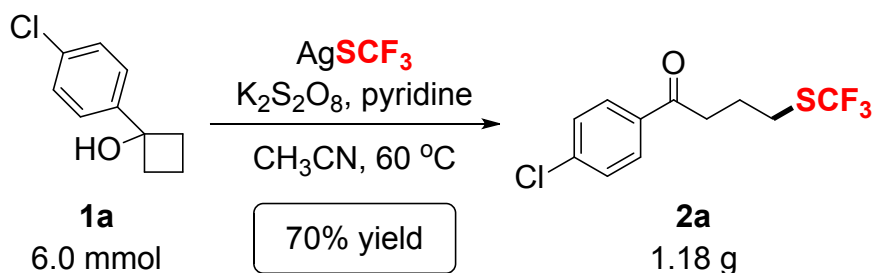

1-(4-Chlorophenyl)cyclobutanol **1a** (1.09 g, 6.0 mmol, 1.0 equiv),  $\text{AgSCF}_3$  (3.13 g, 15.0 mmol, 2.5 equiv),  $\text{K}_2\text{S}_2\text{O}_8$  (4.87 g, 18.0 mmol, 3.0 equiv), and pyridine (950 mg, 12.0 mmol, 2.0 equiv) were placed in a dry *Schlenk* tube under  $\text{N}_2$ . Acetonitrile (60 mL) was added and the reaction mixture was stirred at  $60\text{ }^\circ\text{C}$  for 12 h. The reaction was monitored with TLC. The solvent was removed under reduced pressure and the residue was purified by silica gel column chromatography. Flash column chromatography (petroleum ether/ $\text{Et}_2\text{O}$  = 50/1, v/v) gave the desired product **2a** as colourless oil (1.18 g, 70%).

### Mechanistic studies

(1) Radical inhibition and capturing experiments:

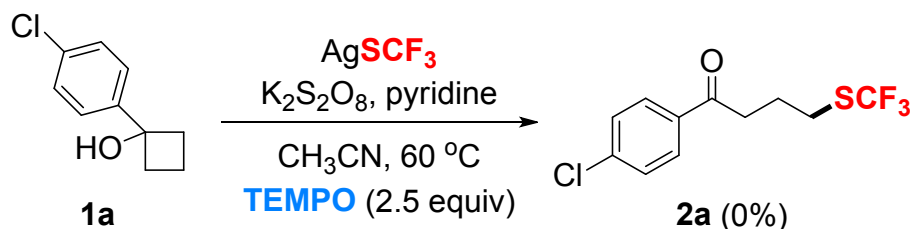

1-(4-Chlorophenyl)cyclobutanol **1a** (45.5 mg, 0.25 mmol, 1.0 equiv),  $\text{AgSCF}_3$  (130.6 mg, 0.625 mmol, 2.5 equiv),  $\text{K}_2\text{S}_2\text{O}_8$  (202.7 mg, 0.75 mmol, 3.0 equiv), pyridine (40  $\mu\text{L}$ , 0.5 mmol, 2.0 equiv), and 2,2,6,6-tetramethyl-1-piperidinyloxy (TEMPO) (97.7 mg, 0.625 mmol, 2.5 equiv) were placed in a dry *Schlenk* tube under  $\text{N}_2$ . Acetonitrile (2.5 mL) was added and the reaction mixture was stirred at  $60\text{ }^\circ\text{C}$  for 12 h. The formation of **2a** was completely suppressed. High-resolution mass spectra analysis of the reaction mixture showed that TEMPO-trapped products **8** and **9** were formed.

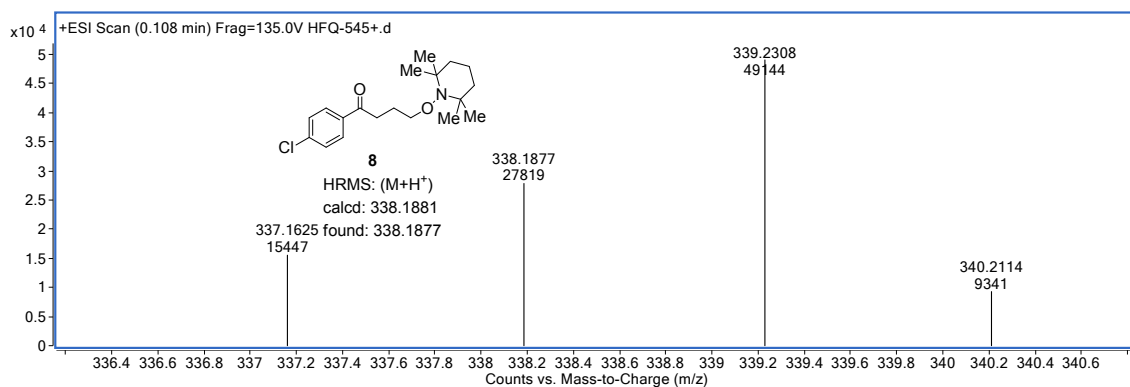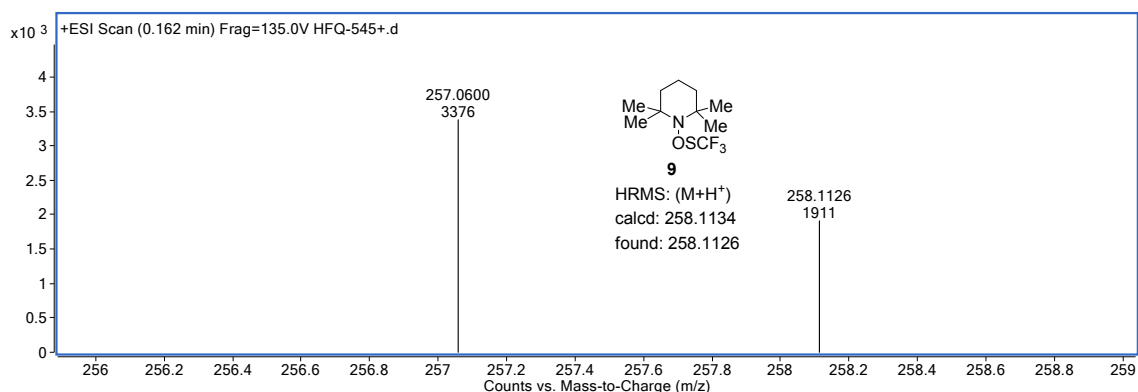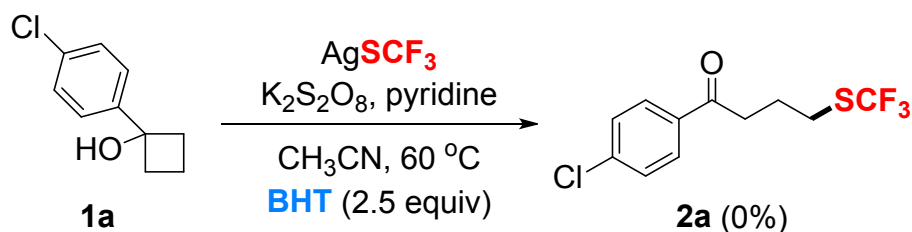

1-(4-Chlorophenyl)cyclobutanol **1a** (45.5 mg, 0.25 mmol, 1.0 equiv), AgSCF<sub>3</sub> (130.6 mg, 0.625 mmol, 2.5 equiv), K<sub>2</sub>S<sub>2</sub>O<sub>8</sub> (202.7 mg, 0.75 mmol, 3.0 equiv), pyridine (40  $\mu$ l, 0.5 mmol, 2.0 equiv), and 2,6-di-*tert*-butyl-4-methylphenol (BHT) (137.7 mg, 0.625 mmol, 2.5 equiv) were placed in a dry *Schlenk* tube under N<sub>2</sub>. Acetonitrile (2.5 mL) was added and the reaction mixture was stirred at 60 °C for 12 h. The formation of **2a** was completely suppressed.

(2) Control experiment:

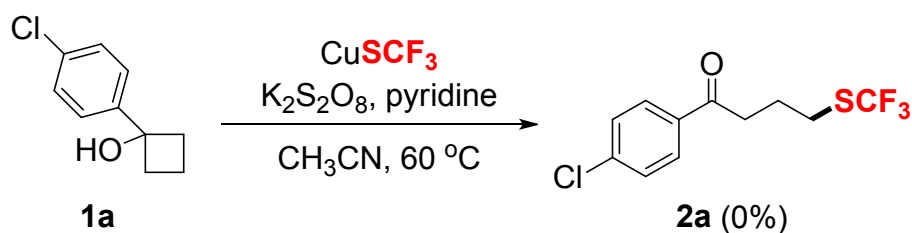

1-(4-Chlorophenyl)cyclobutanol **1a** (45.5 mg, 0.25 mmol, 1.0 equiv), CuSCF<sub>3</sub> (102.4 mg, 0.625 mmol, 2.5 equiv), K<sub>2</sub>S<sub>2</sub>O<sub>8</sub> (202.7 mg, 0.75 mmol, 3.0 equiv), and pyridine (40  $\mu$ l, 0.5 mmol, 2.0 equiv) were placed in a dry *Schlenk* tube under N<sub>2</sub>. Acetonitrile (2.5 mL) was added and the reaction mixture was stirred at 60 °C for 12 h. The reaction did not afford the desired product **2a**.

## **References:**

- [1] (a) Ilangoan, A.; Saravanakumar, S.; Malayappasamy, S. *Org. Lett.* **2013**, *15*, 4968. (b) Rosa, D.; Orellana, A. *Chem. Commun.* **2013**, *49*, 5420. (c) Jiao, J.; Nguyen, L. X.; Patterson, D. R.; Flowers, R. A. II. *Org. Lett.* **2007**, *9*, 1323. (d) Wang, Y.-F.; Chiba, S. *J. Am. Chem. Soc.* **2009**, *131*, 12570.
- [2] (a) Casey, B. M.; Eakin, C. A.; Flowers, R. A. II. *Tetrahedron Lett.* **2009**, *50*, 1264. (b) Rosa, D.; Chtchemelinine, A.; Orellana, A. *Synthesis* **2012**, 1885. (c) Xu, H.-J.; Zhu, F.-F.; Shen, Y.-Y.; Wan, X.; Feng, Y.-S. *Tetrahedron* **2012**, *68*, 4145. (d) Zhao, H.; Fan, X.; Yu, J.; Zhu, C. *J. Am. Chem. Soc.* **2015**, *137*, 3490.
- [3] Li, Y.; Ye, Z.-S.; Bellman, T.-M.; Chi, T.; Dai, M.-J. *Org. Lett.* **2015**, *17*, 2186.

7.902  
7.885  
7.450  
7.432  
7.264

3.120  
3.106  
3.093  
3.033  
3.019  
3.005  
2.180  
2.167  
2.153  
2.139  
2.125

-0.000

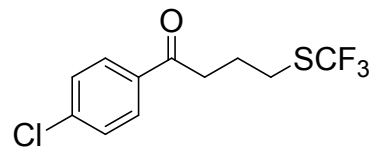

**2a**

<sup>1</sup>H NMR (500 MHz, CDCl<sub>3</sub>)

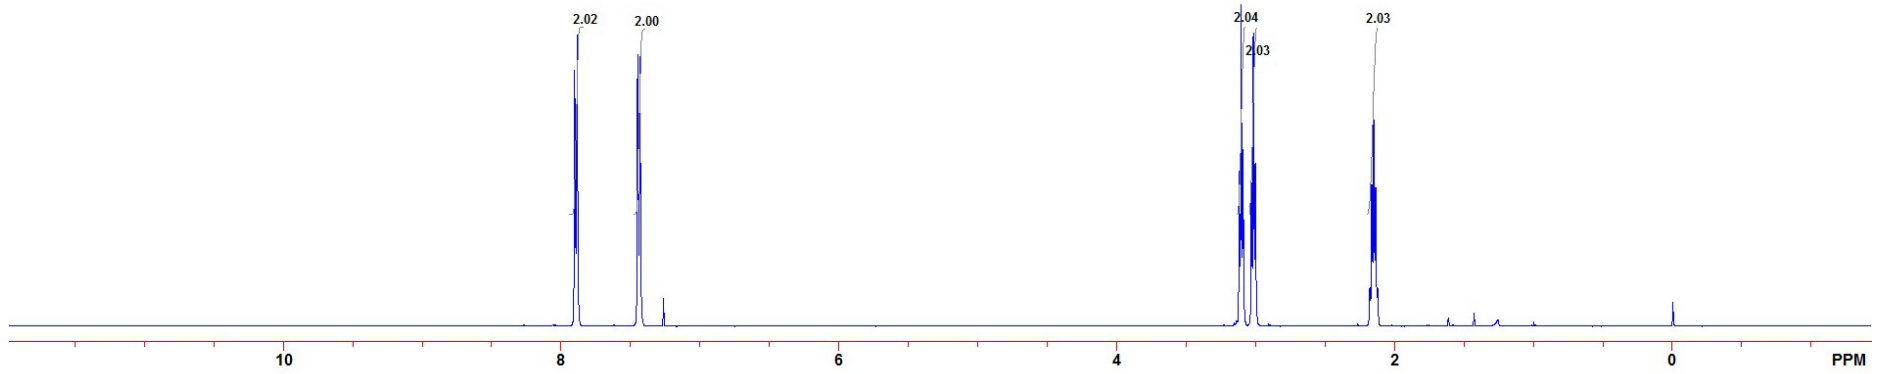

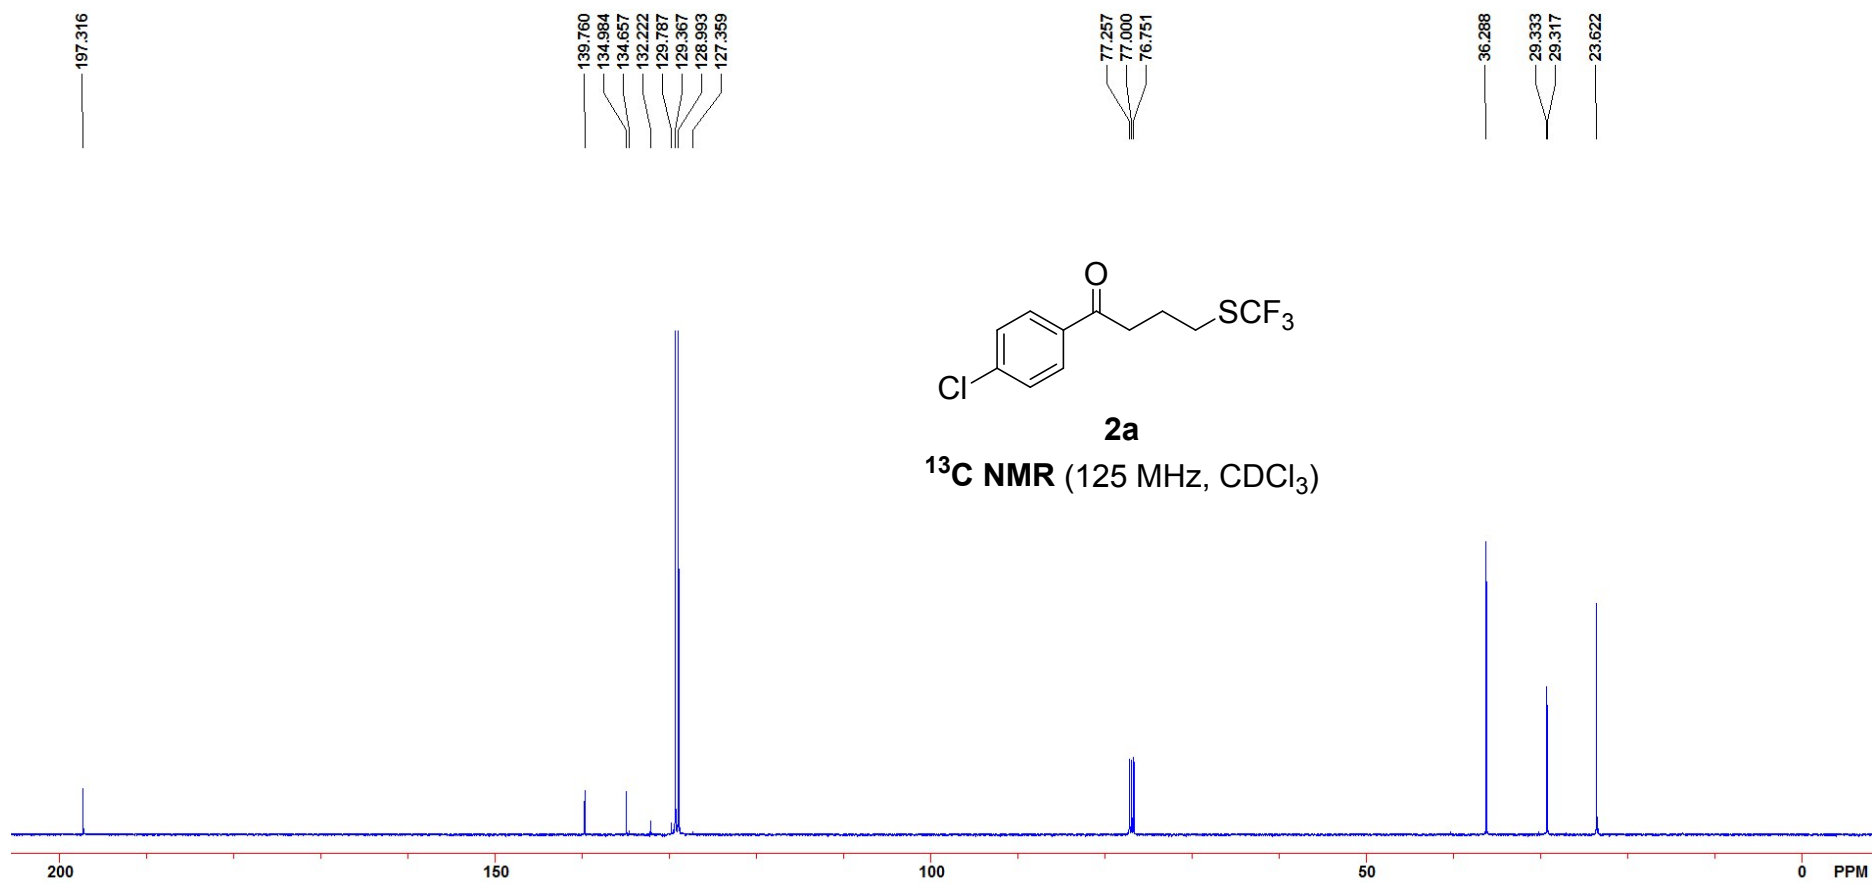

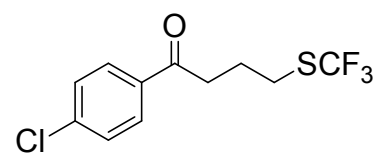

**2a**

**<sup>19</sup>F NMR (282 MHz, CDCl<sub>3</sub>)**

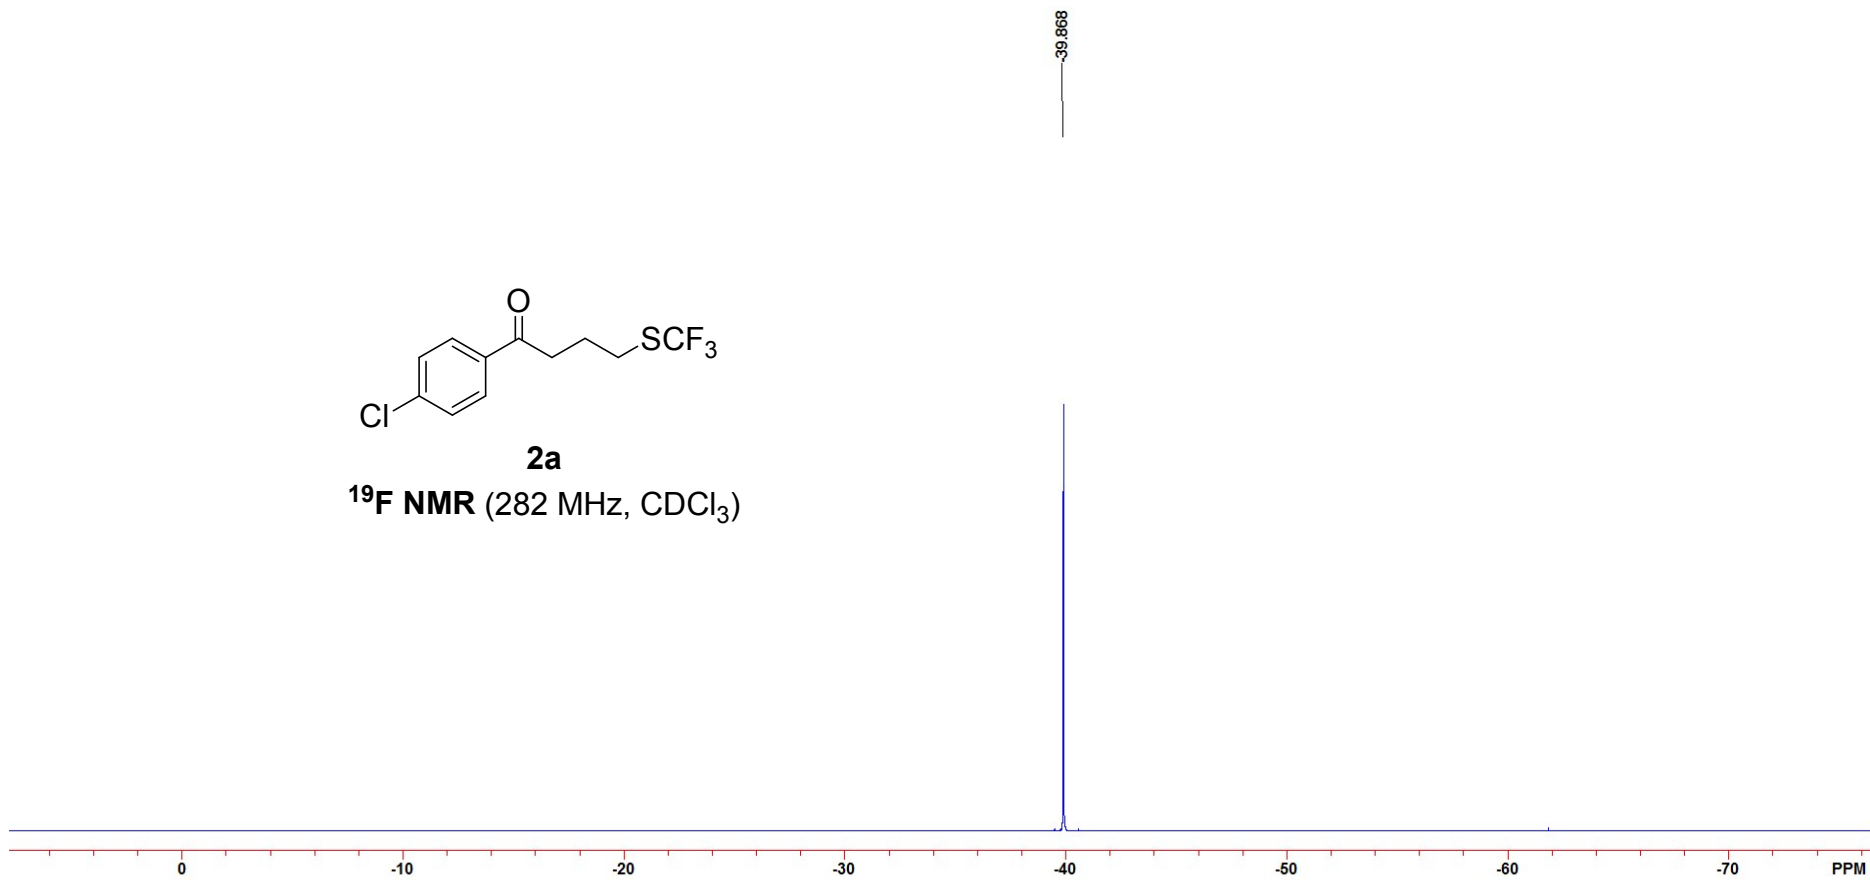

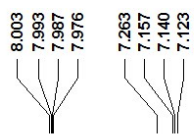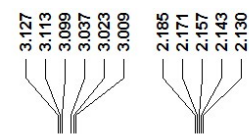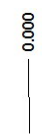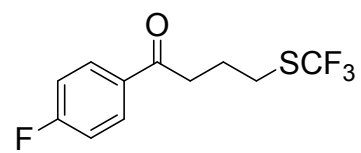

**2b**

<sup>1</sup>H NMR (500 MHz, CDCl<sub>3</sub>)

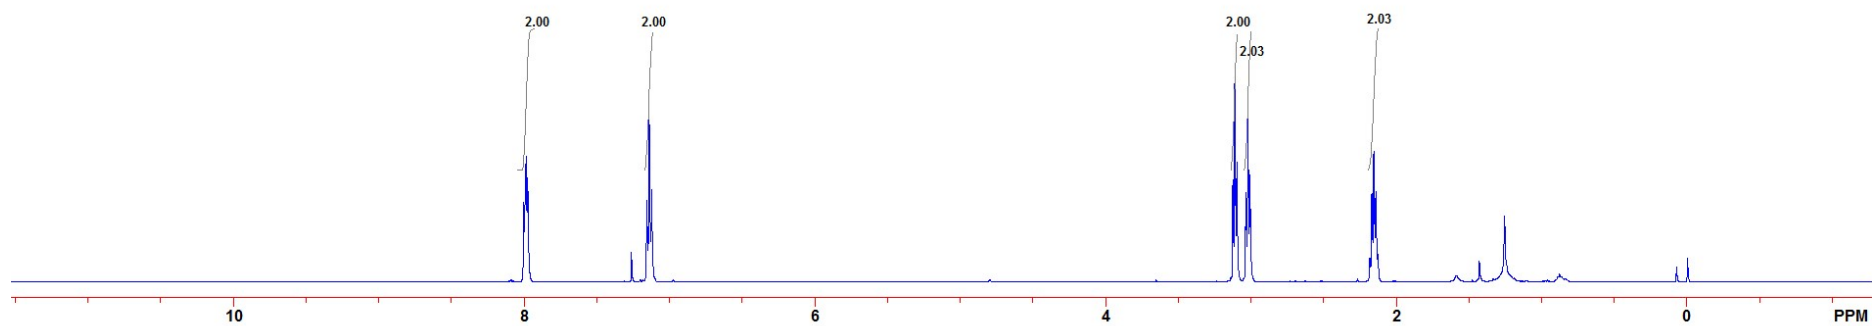



196.961

167.566

164.189

137.102

133.152

133.108

133.042

130.669

130.544

128.991

124.939

115.927

115.634

77.425

77.000

76.575

36.241

29.391

29.361

23.690

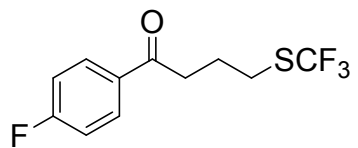

**2b**

<sup>13</sup>C NMR (75 MHz, CDCl<sub>3</sub>)

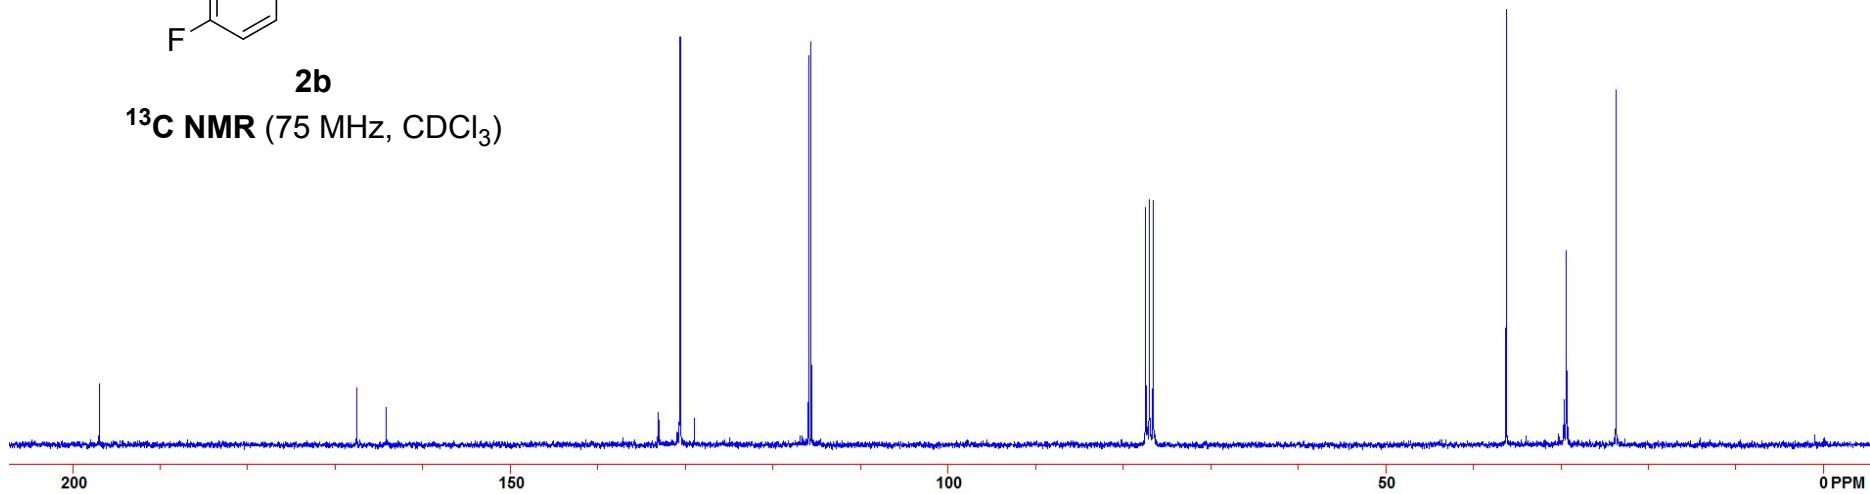

-39.867

-103.825

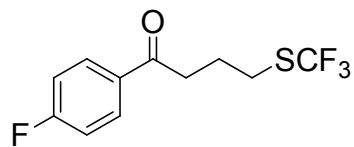

**2b**

**<sup>19</sup>F NMR (282 MHz, CDCl<sub>3</sub>)**

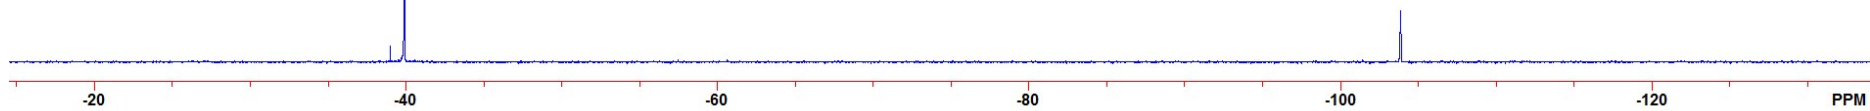

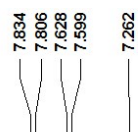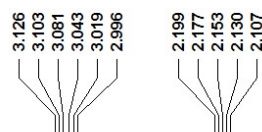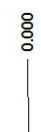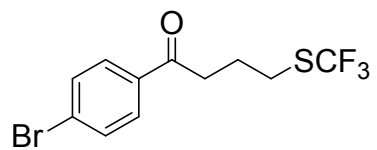

**2c**

**<sup>1</sup>H NMR (300 MHz, CDCl<sub>3</sub>)**

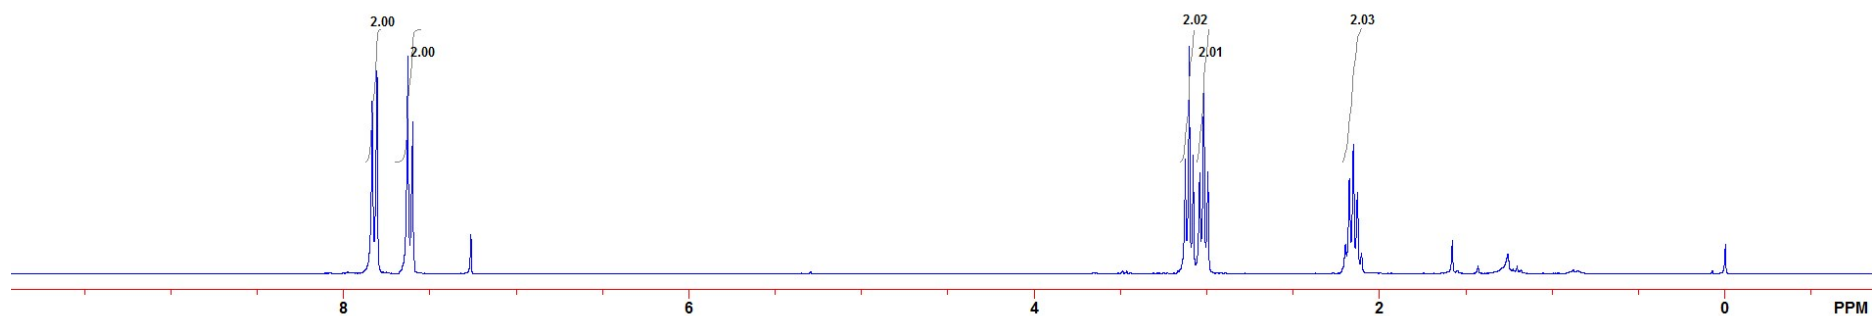

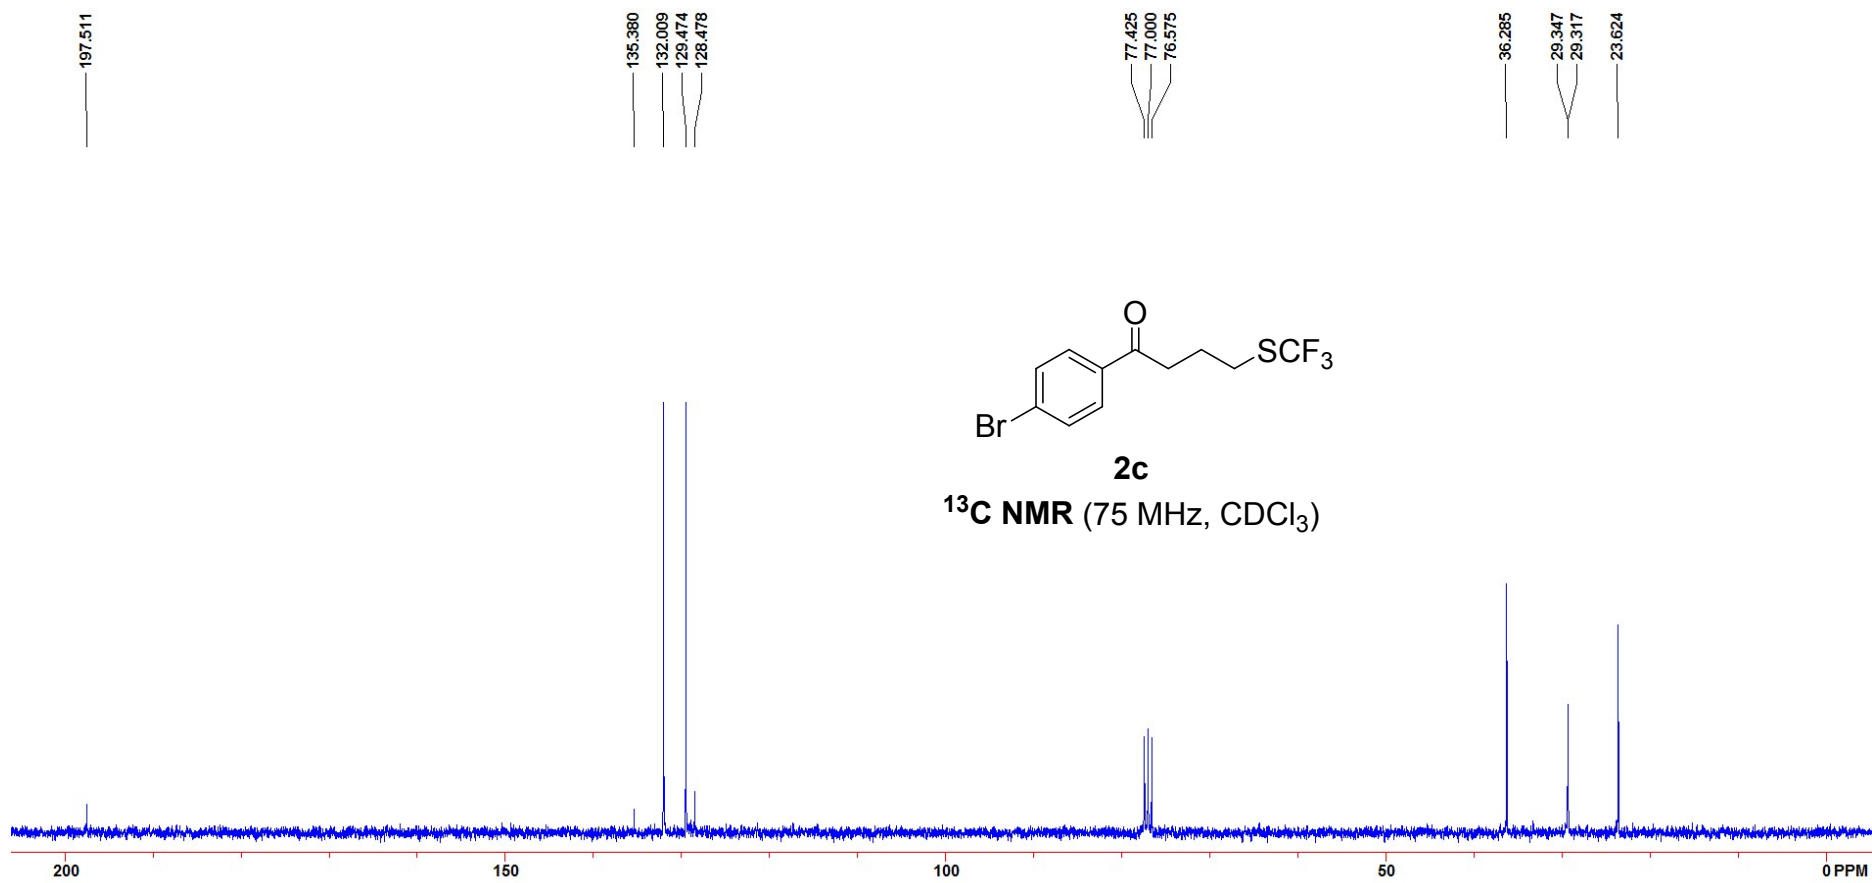

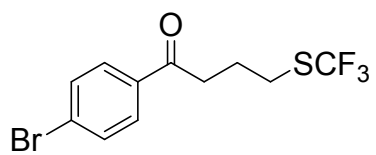

**2c**

**<sup>19</sup>F NMR (282 MHz, CDCl<sub>3</sub>)**

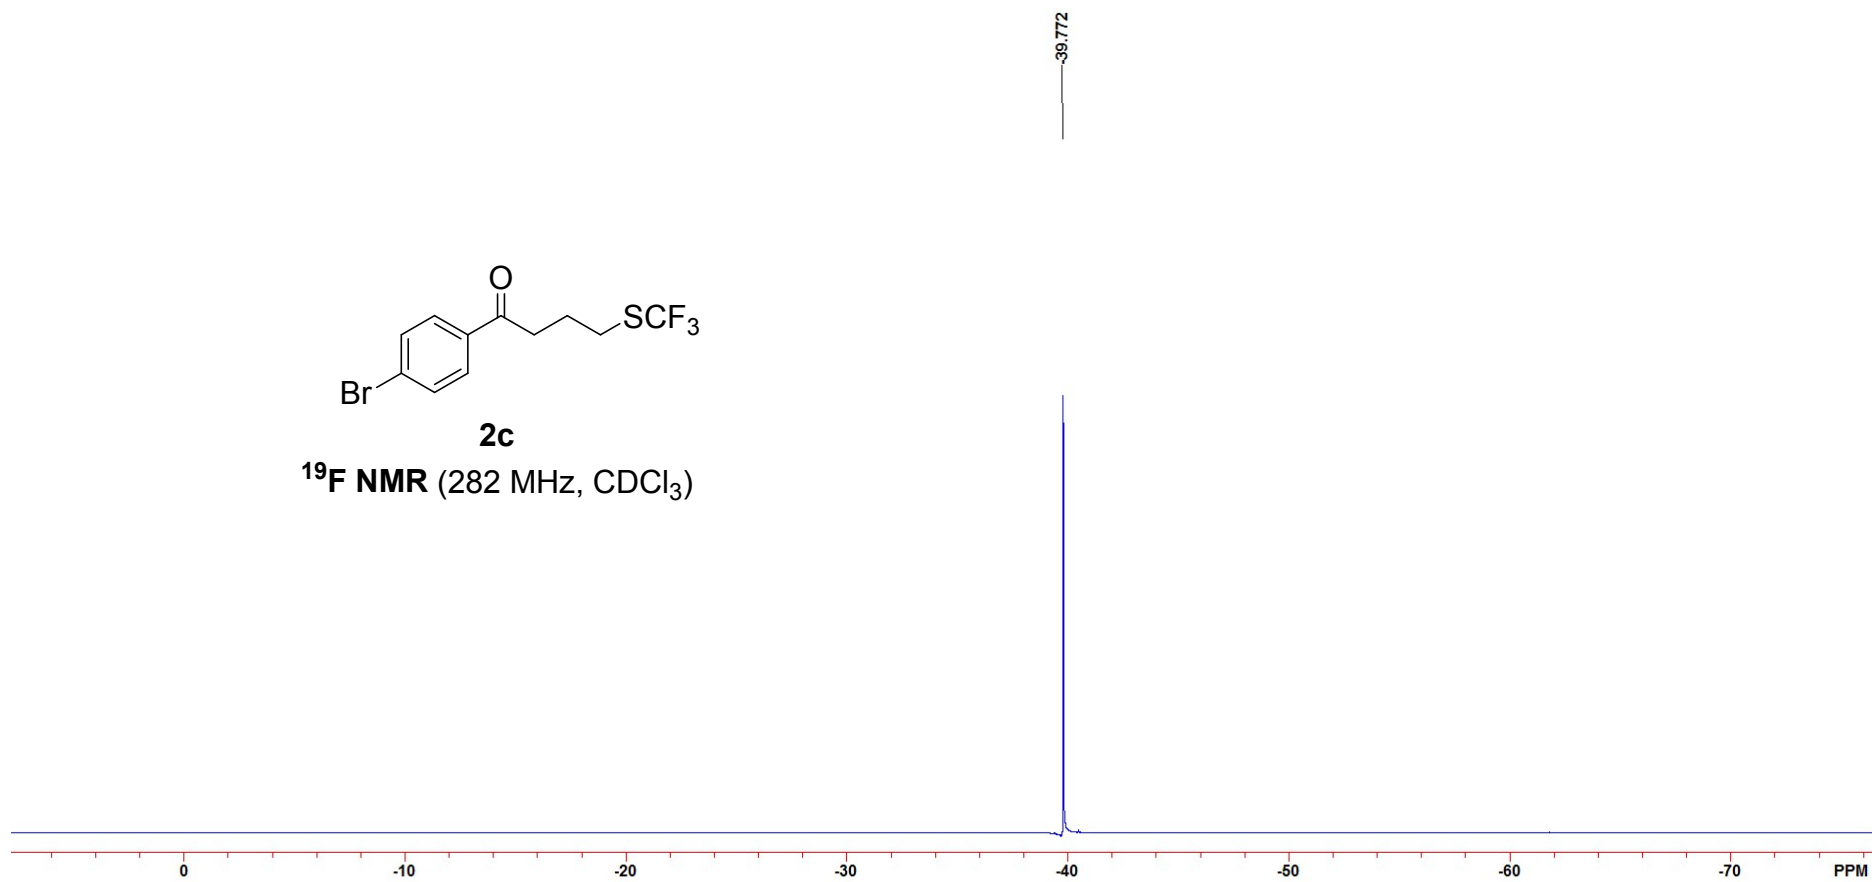

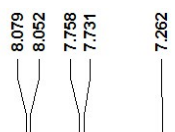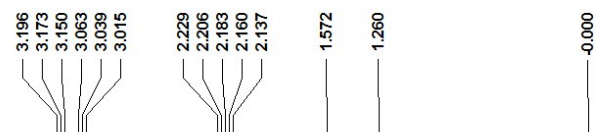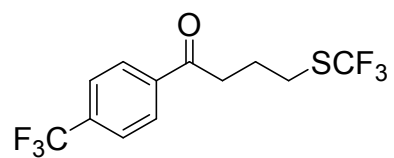

**2d**

<sup>1</sup>H NMR (300 MHz, CDCl<sub>3</sub>)

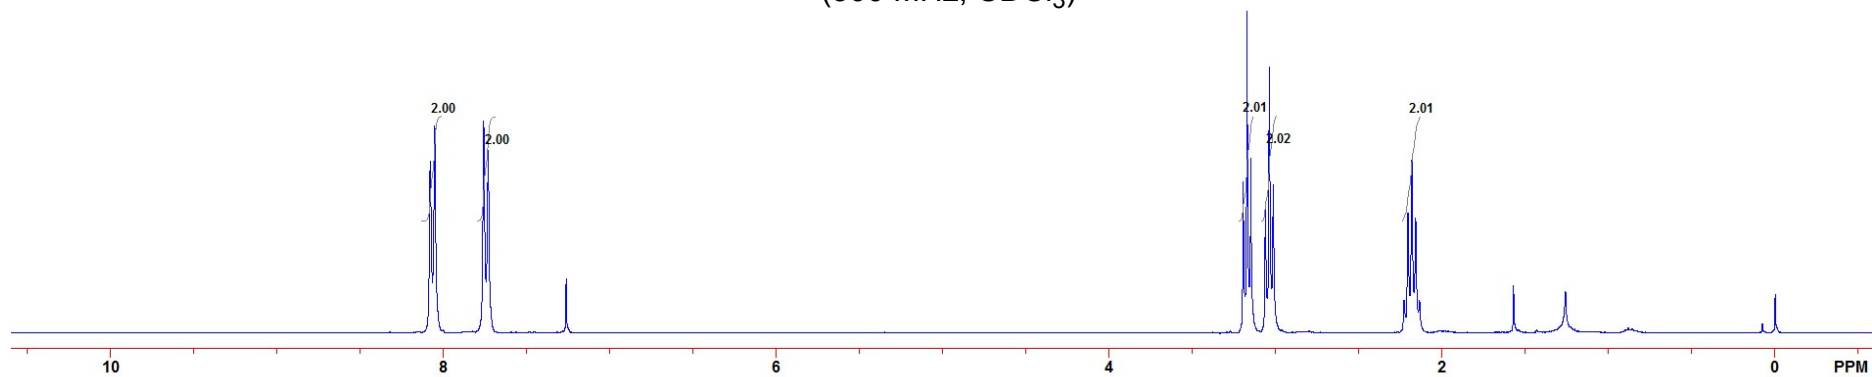

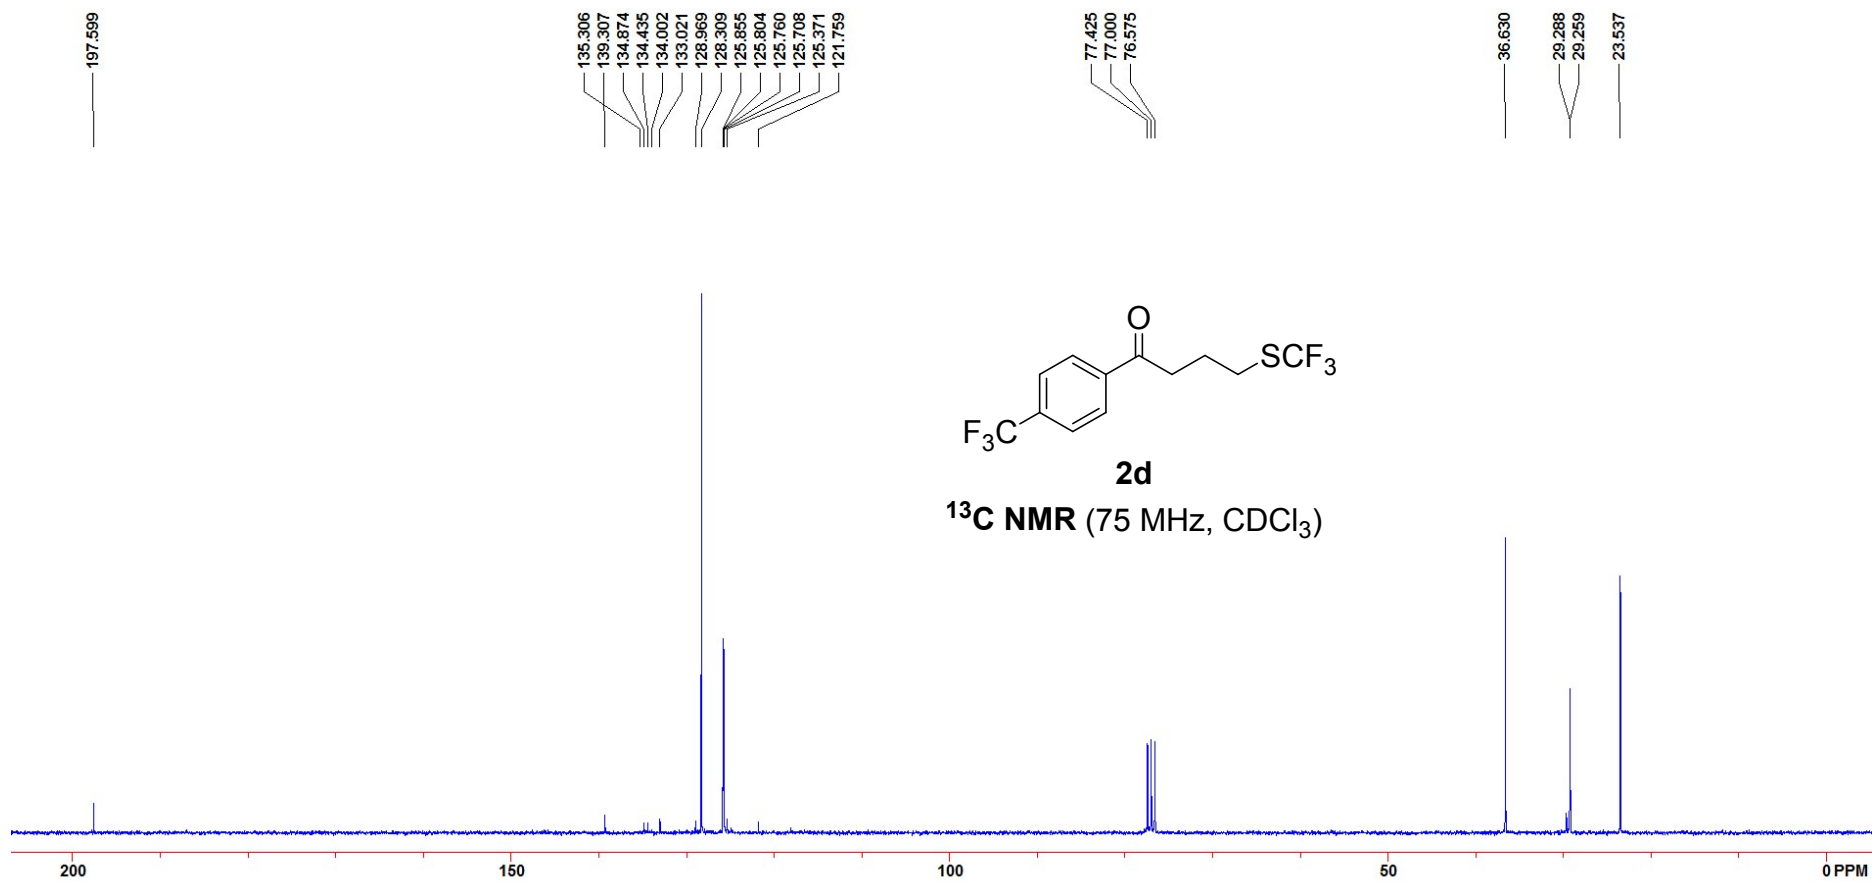

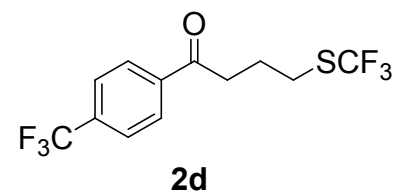

<sup>19</sup>F NMR (282 MHz, CDCl<sub>3</sub>)

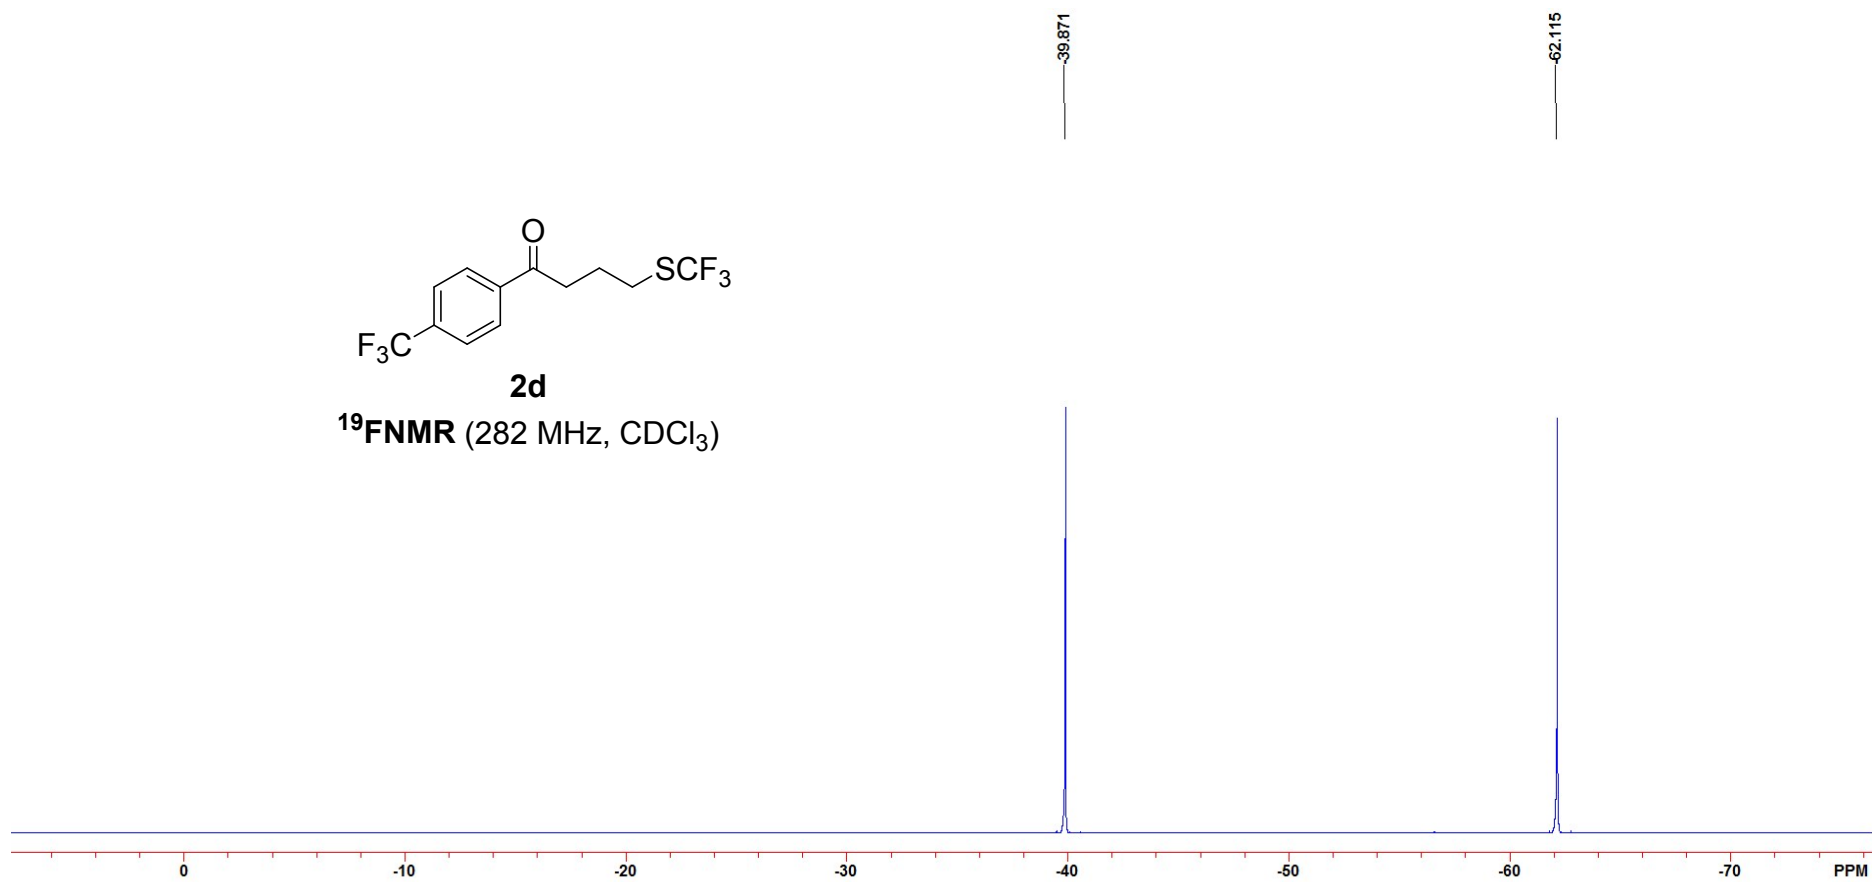



8.023  
8.006

7.307  
7.291  
7.263

3.144  
3.131  
3.117  
3.042  
3.028  
3.013

2.194  
2.180  
2.166  
2.152  
2.139

0.000

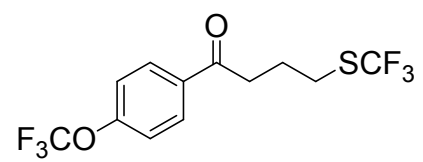

**2e**

$^1\text{H NMR}$  (500 MHz,  $\text{CDCl}_3$ )

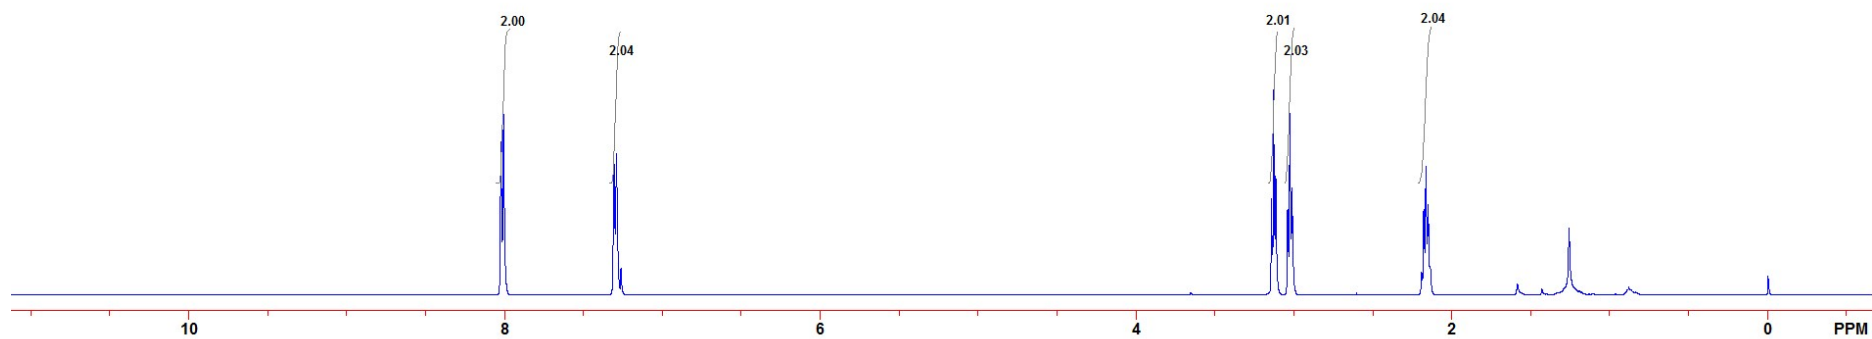

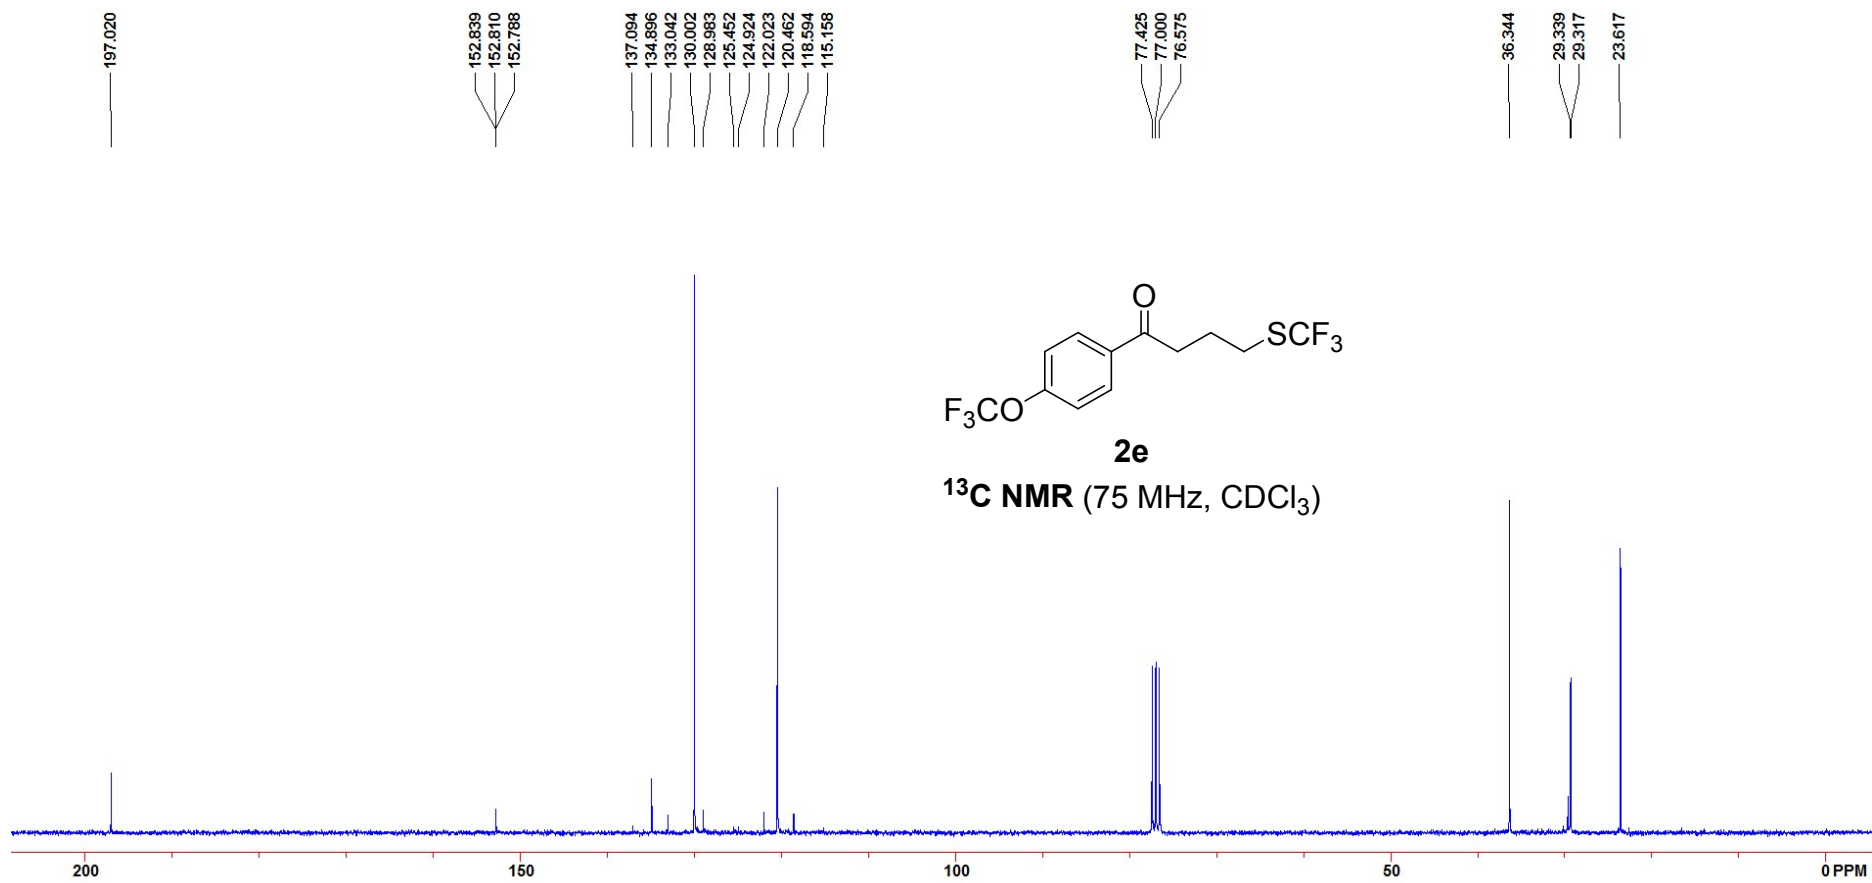

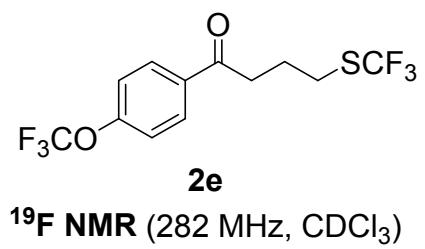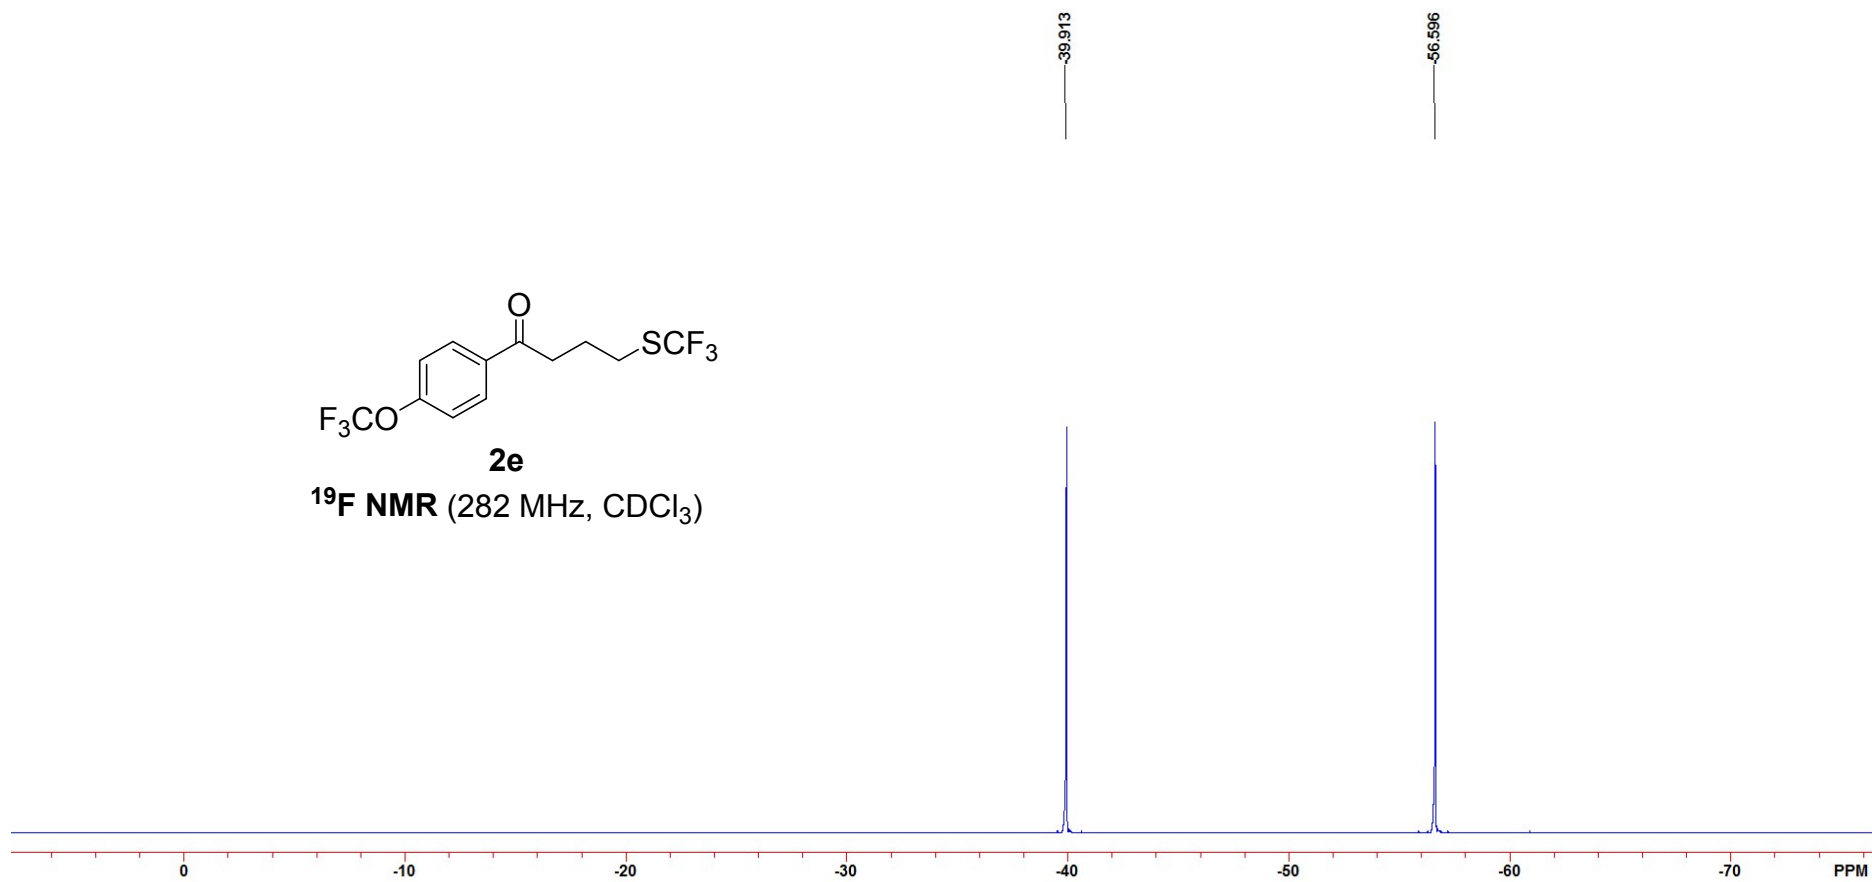

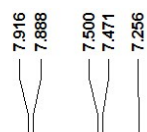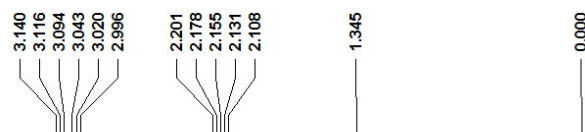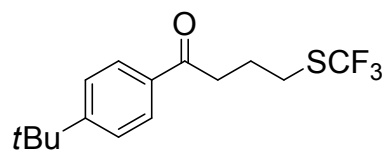

**2f**  
**<sup>1</sup>H NMR (300 MHz, CDCl<sub>3</sub>)**

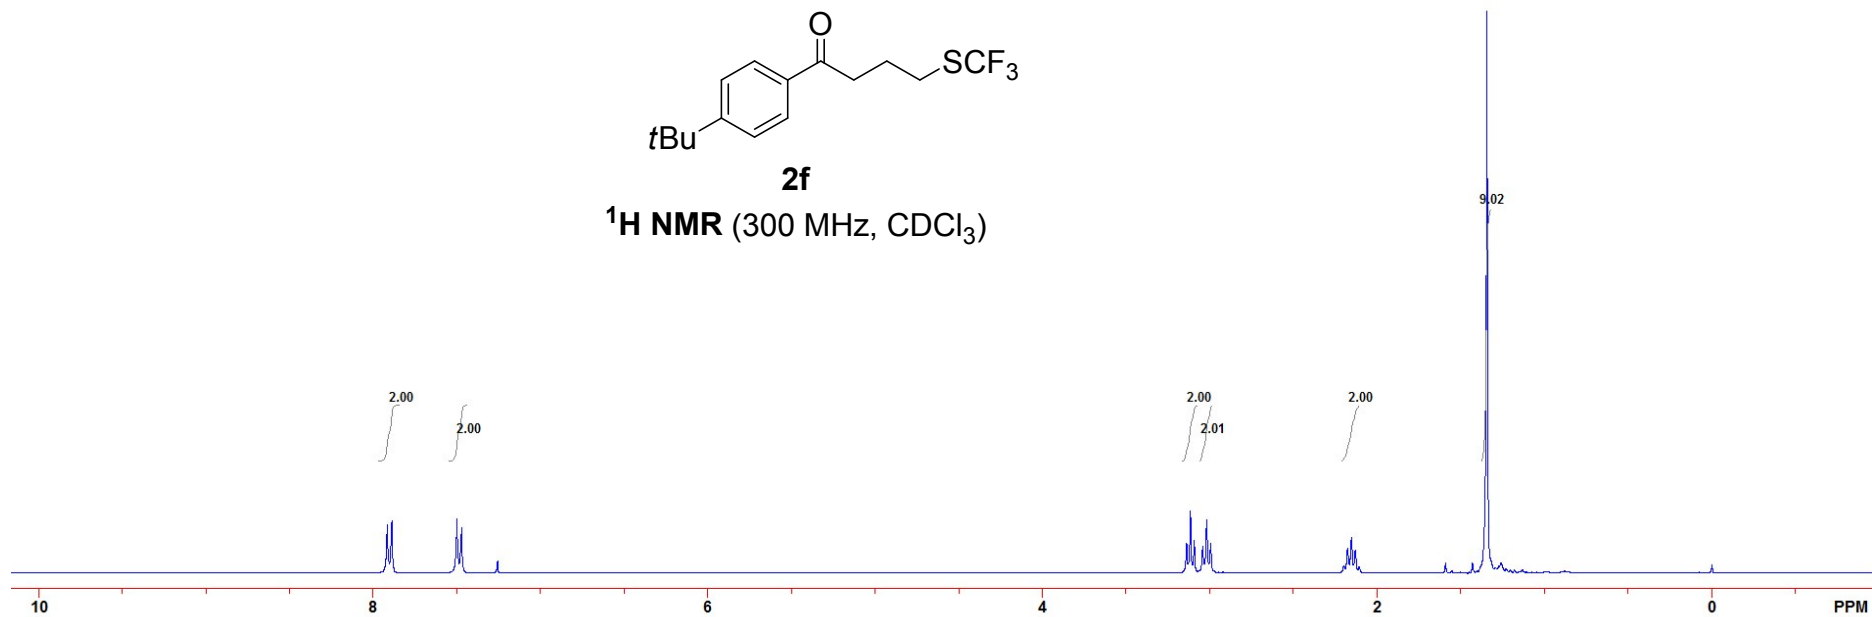

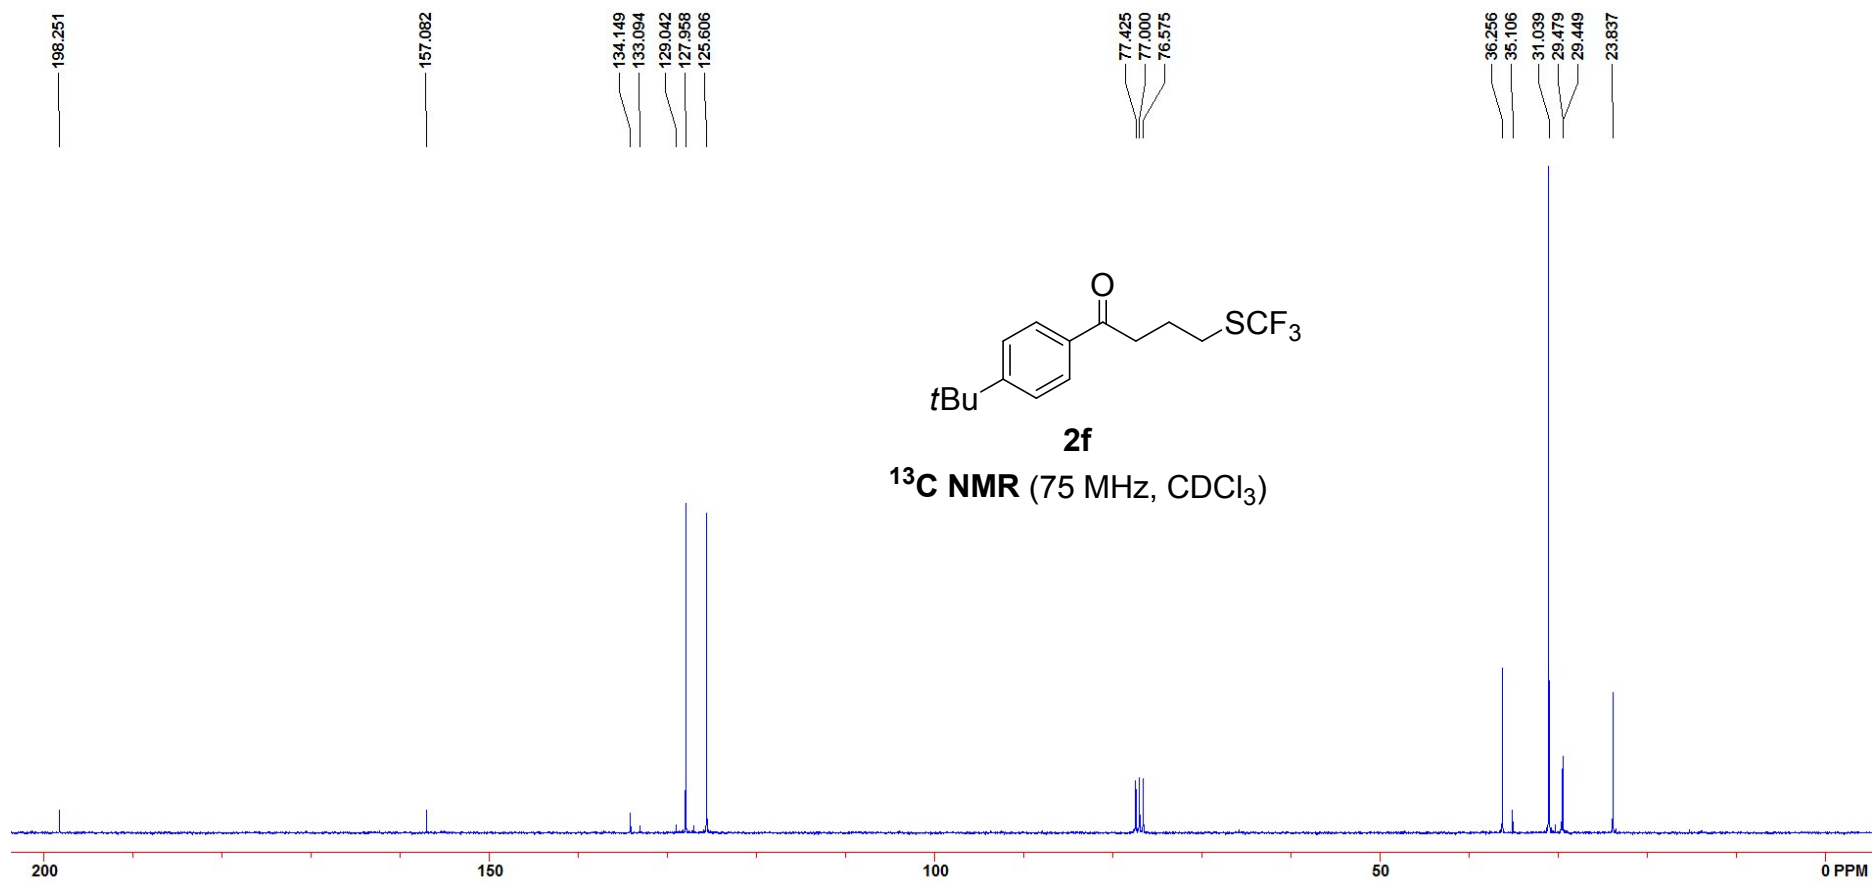

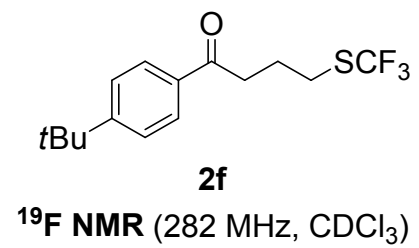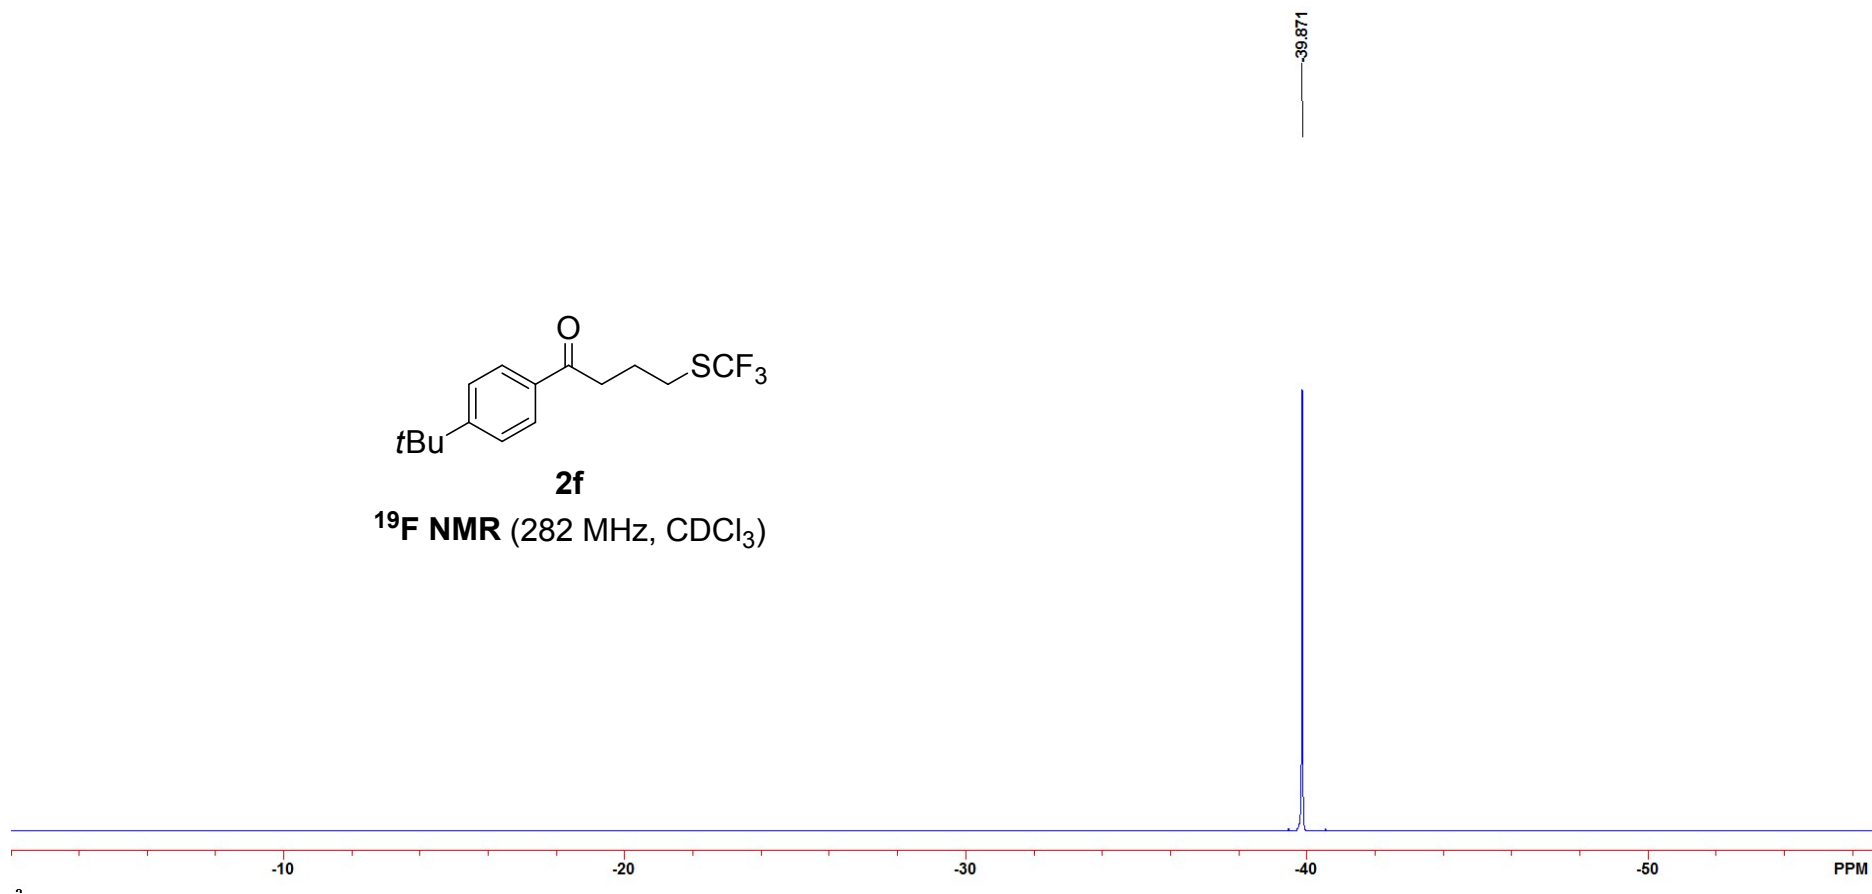

8.030  
8.013  
7.691  
7.674  
7.625  
7.610  
7.478  
7.463  
7.448  
7.409  
7.395  
7.380  
7.242

3.169  
3.155  
3.141  
3.049  
3.035  
3.021  
2.205  
2.191  
2.177  
2.163  
2.150

1.258

-0.000

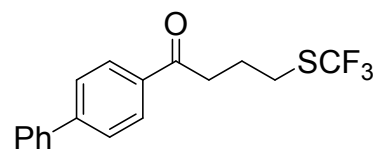

**2g**

**<sup>1</sup>H NMR (500 MHz, CDCl<sub>3</sub>)**

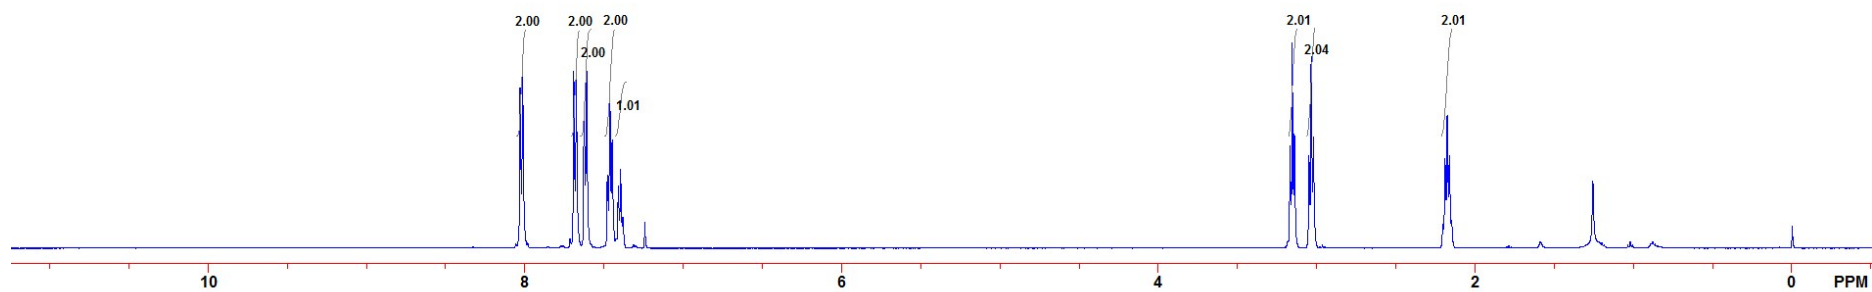

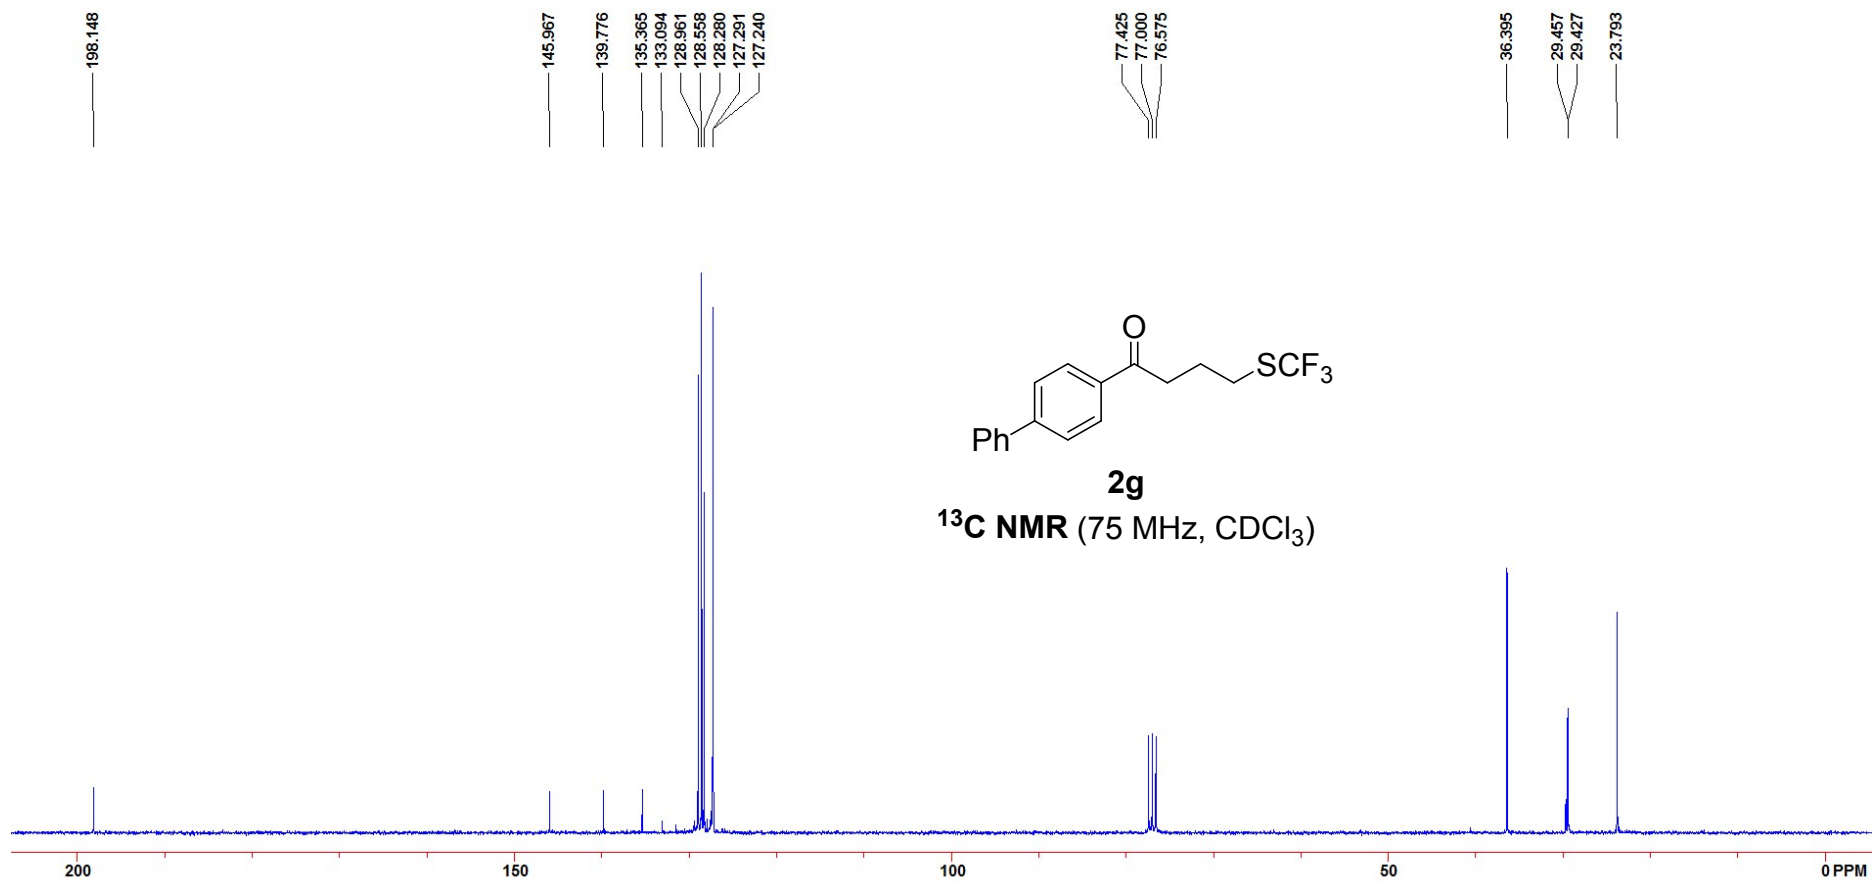



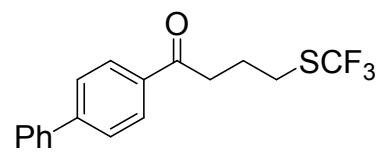

**2g**

**<sup>19</sup>F NMR (282 MHz, CDCl<sub>3</sub>)**

-39.818

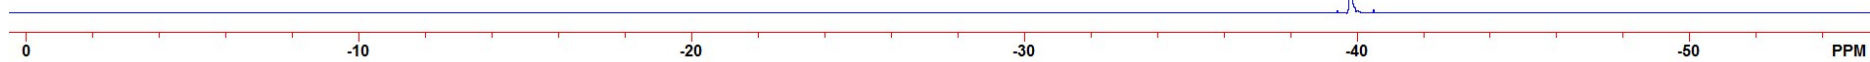

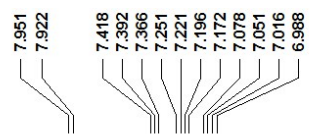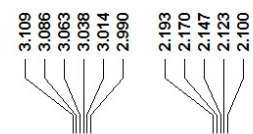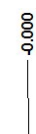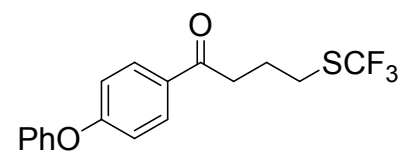

**2h**

**<sup>1</sup>H NMR (300 MHz, CDCl<sub>3</sub>)**

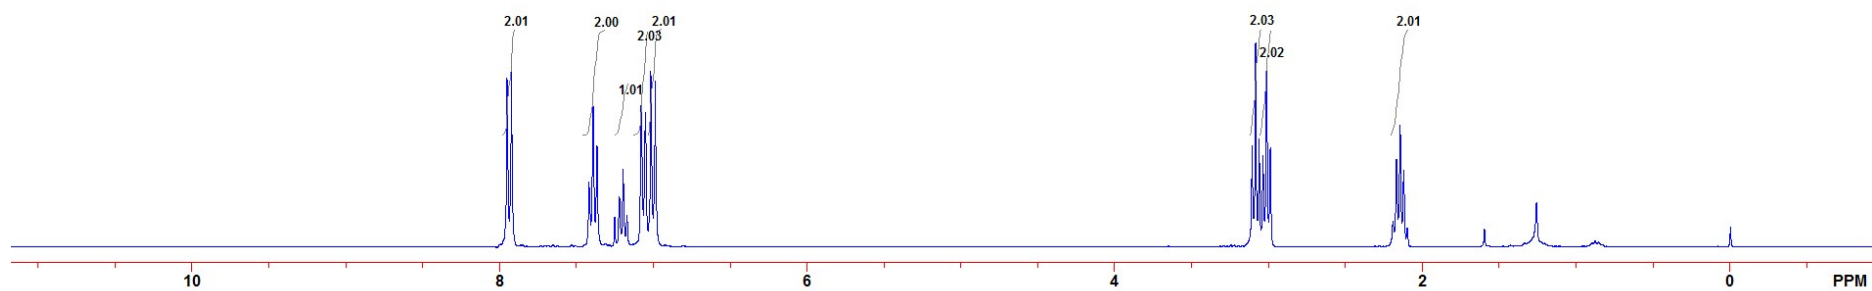

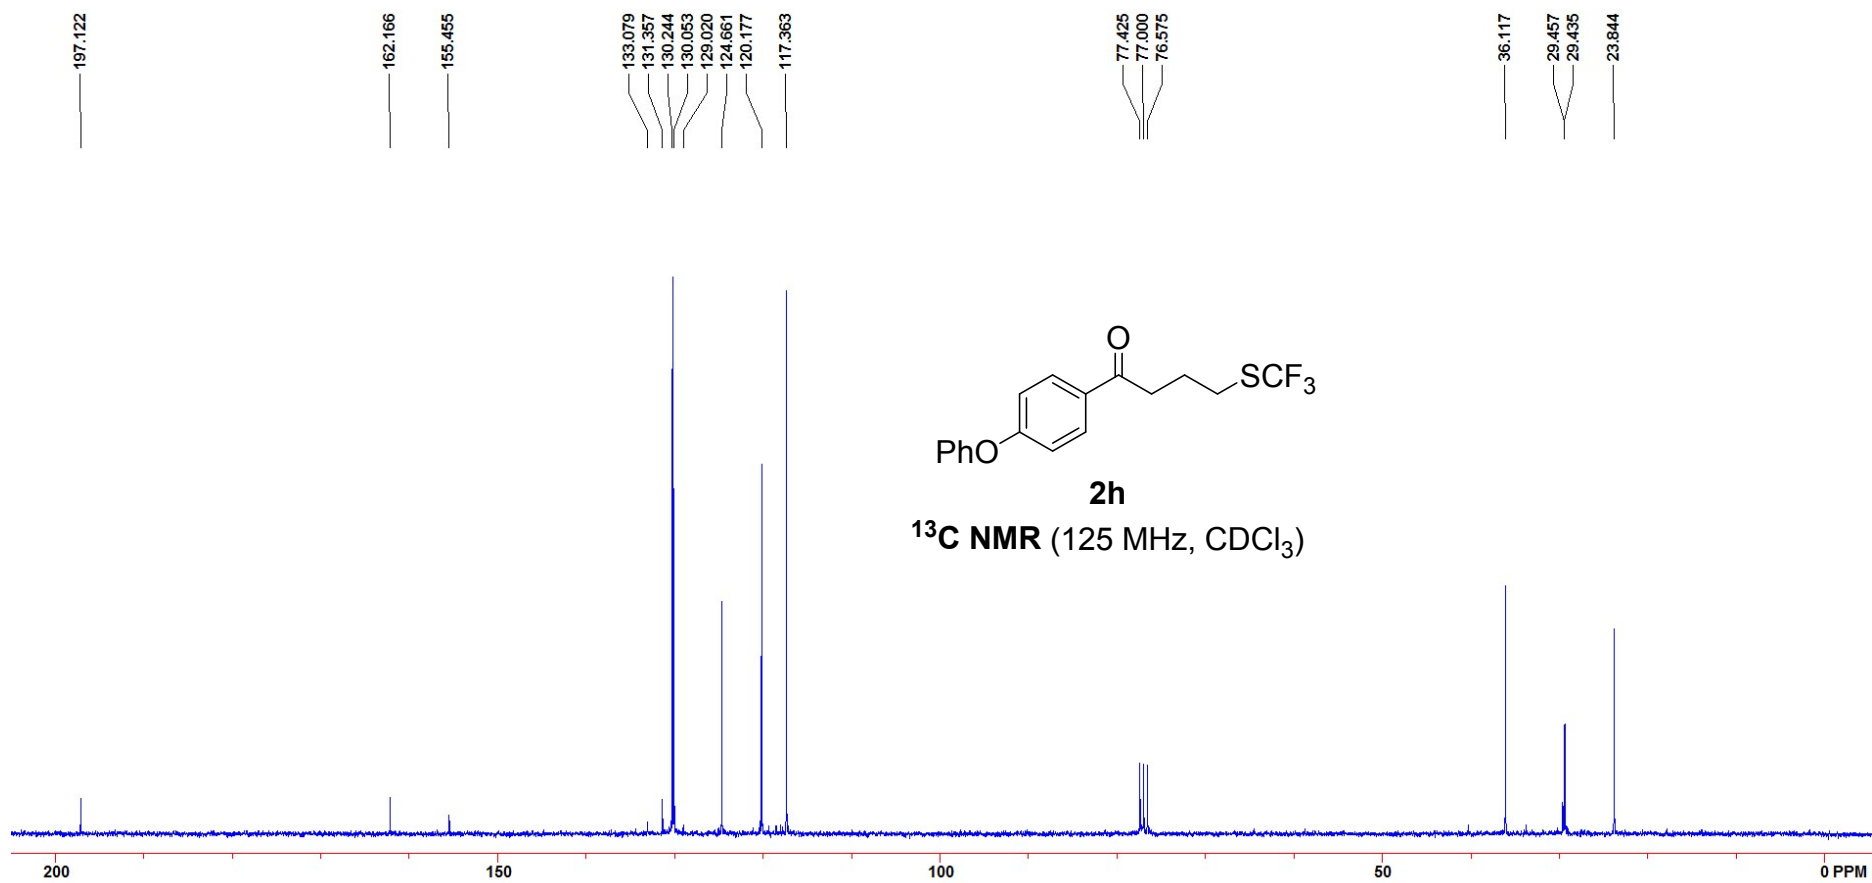

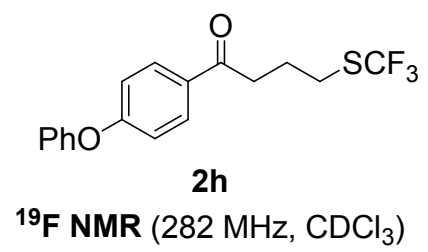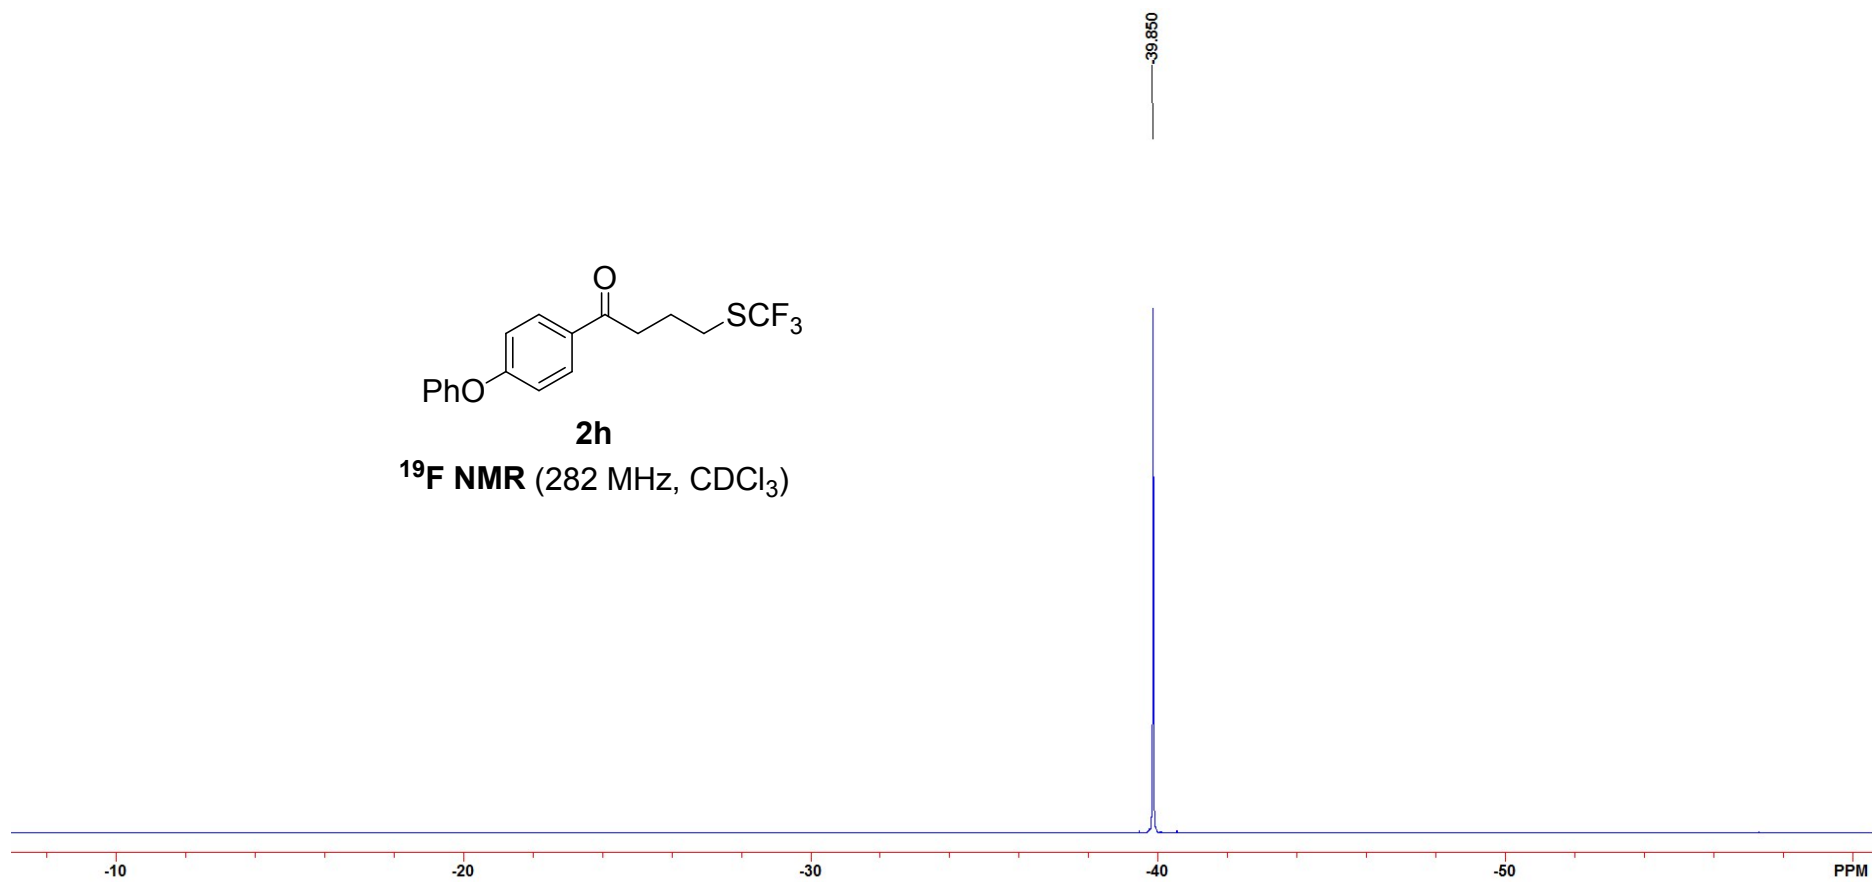

7.736  
7.712  
7.645  
7.622  
7.599  
7.594  
7.568  
7.543  
7.428  
7.404  
7.260

3.037  
3.031  
3.013  
3.009  
2.989

2.190  
2.167  
2.144  
2.121

-0.000

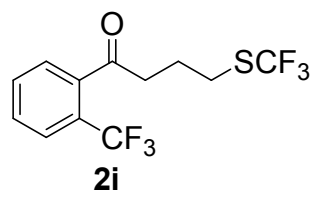

**<sup>1</sup>H NMR (300 MHz, CDCl<sub>3</sub>)**

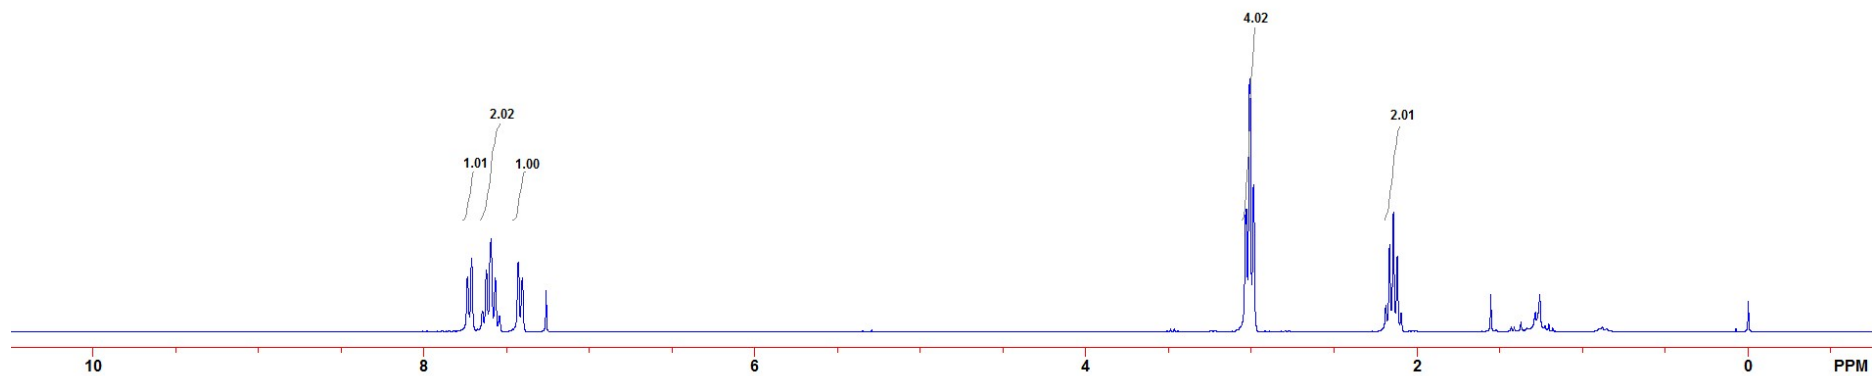

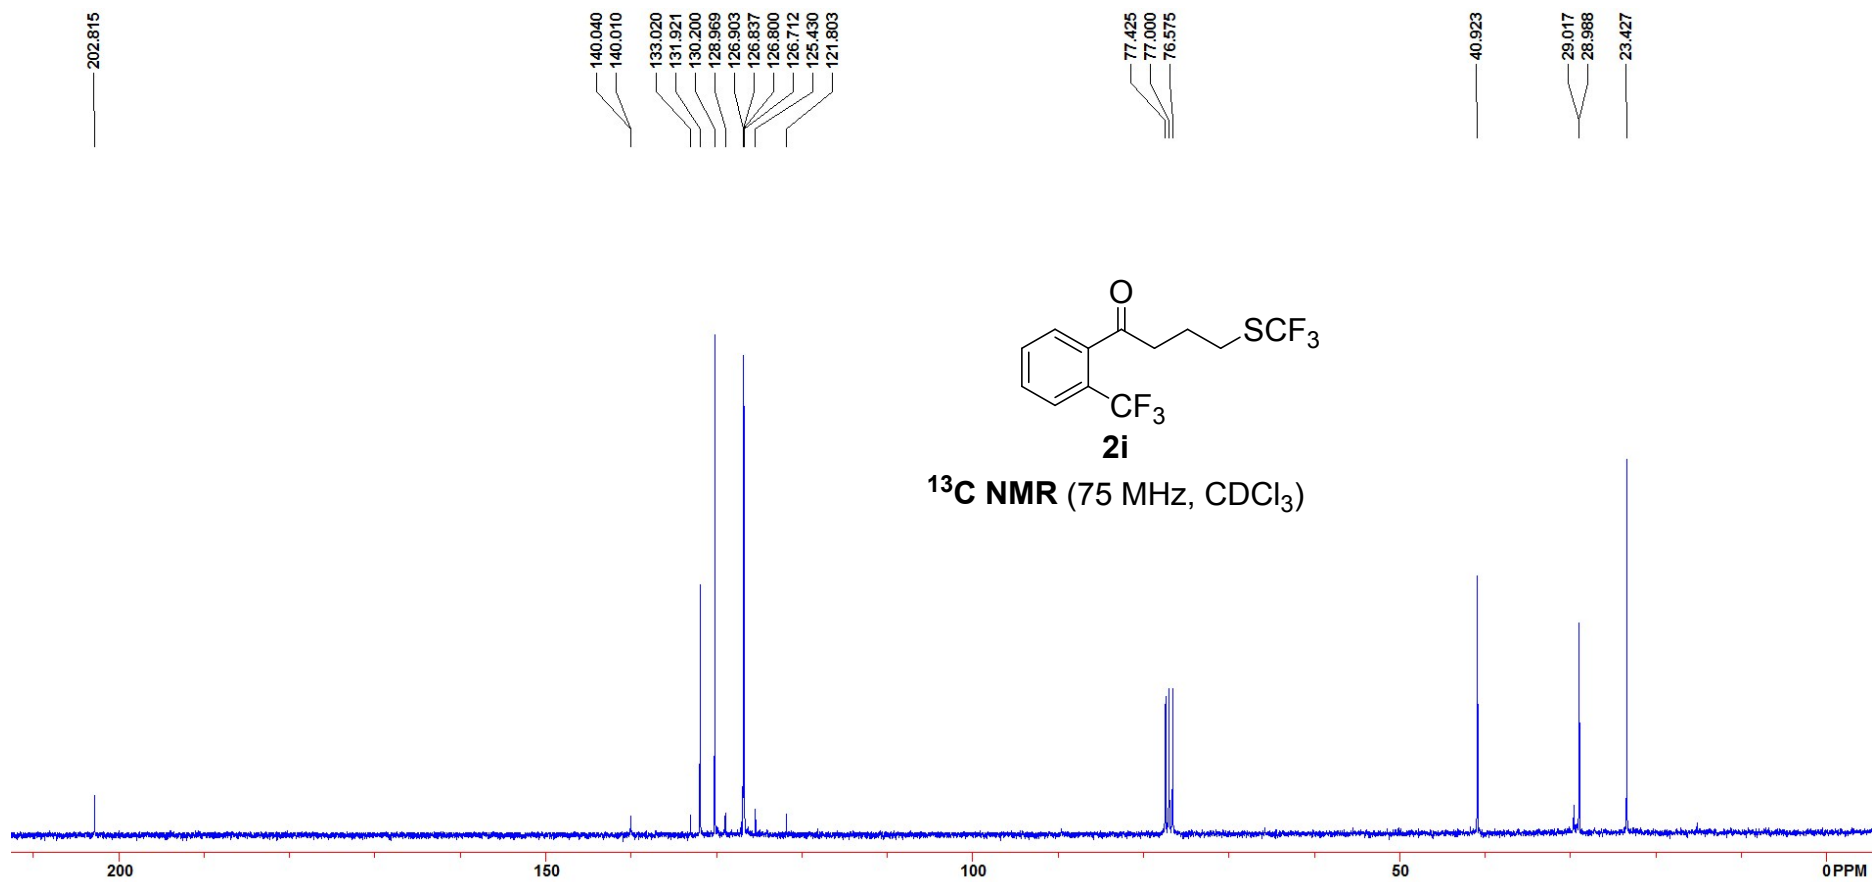

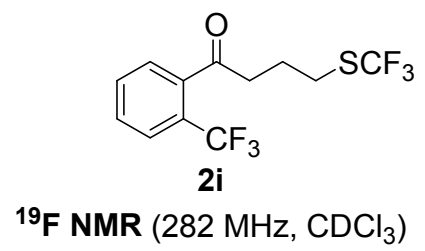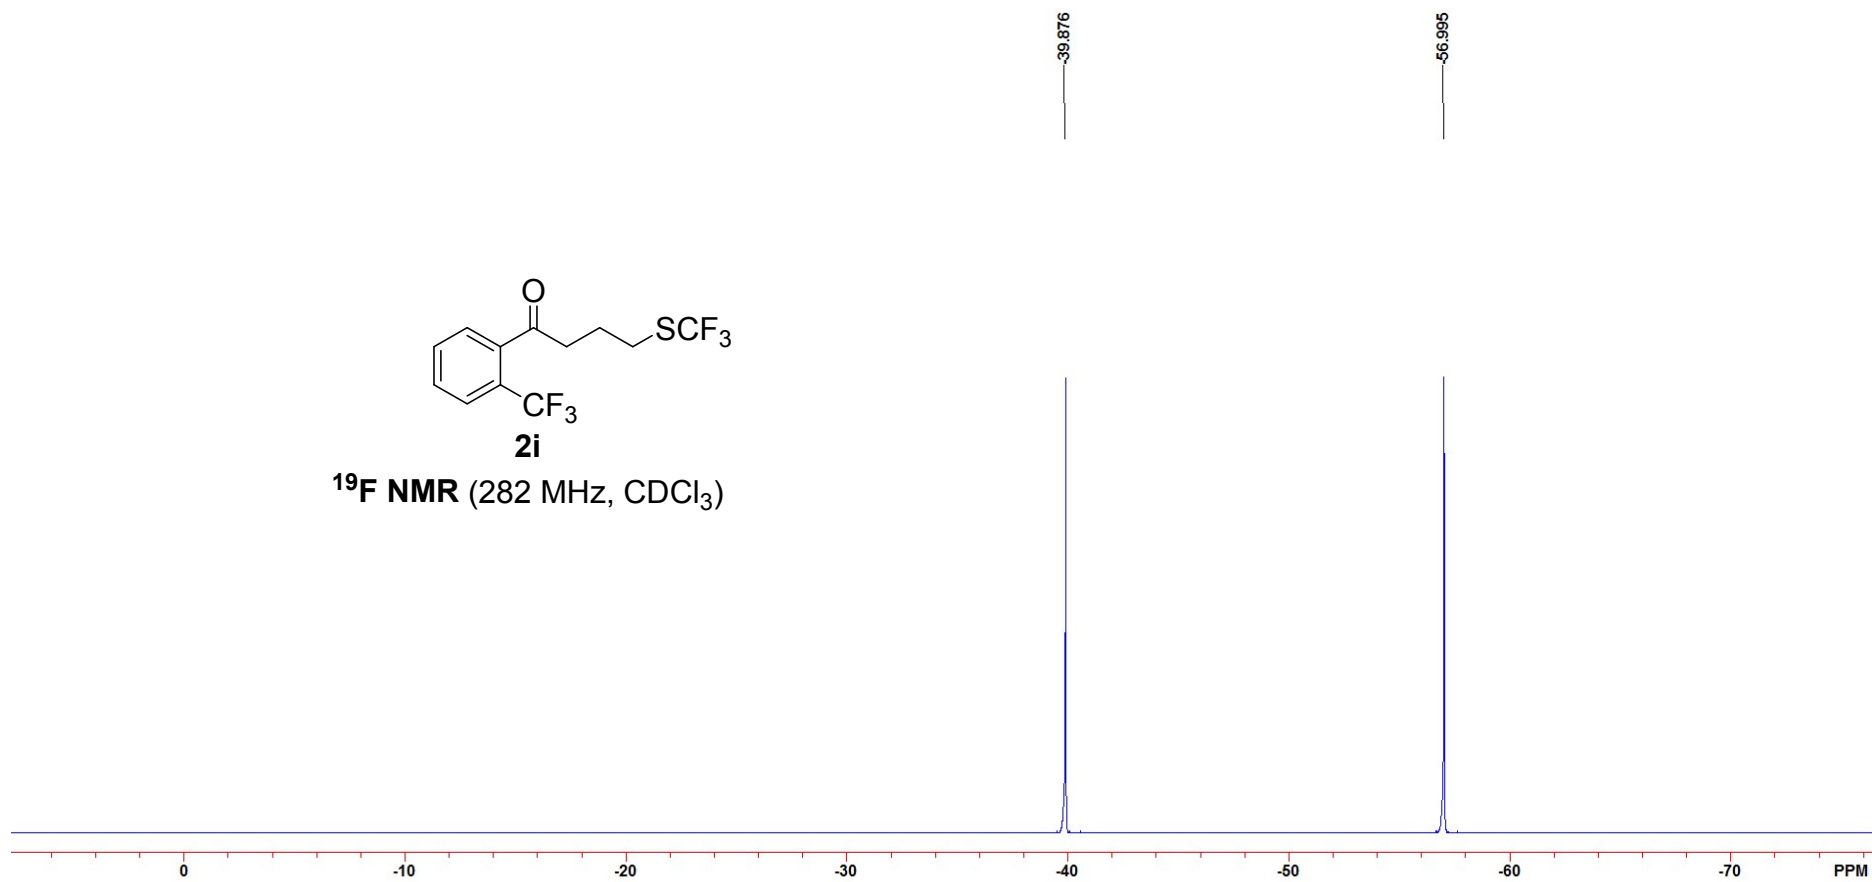

7.924  
7.837  
7.822  
7.555  
7.539  
7.434  
7.418  
7.402  
7.259

3.129  
3.116  
3.102  
3.036  
3.022  
3.008

2.187  
2.174  
2.160  
2.146  
2.133

-0.000

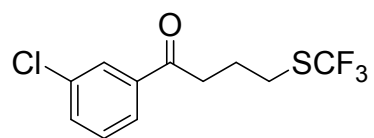

**2j**

**<sup>1</sup>H NMR (500 MHz, CDCl<sub>3</sub>)**

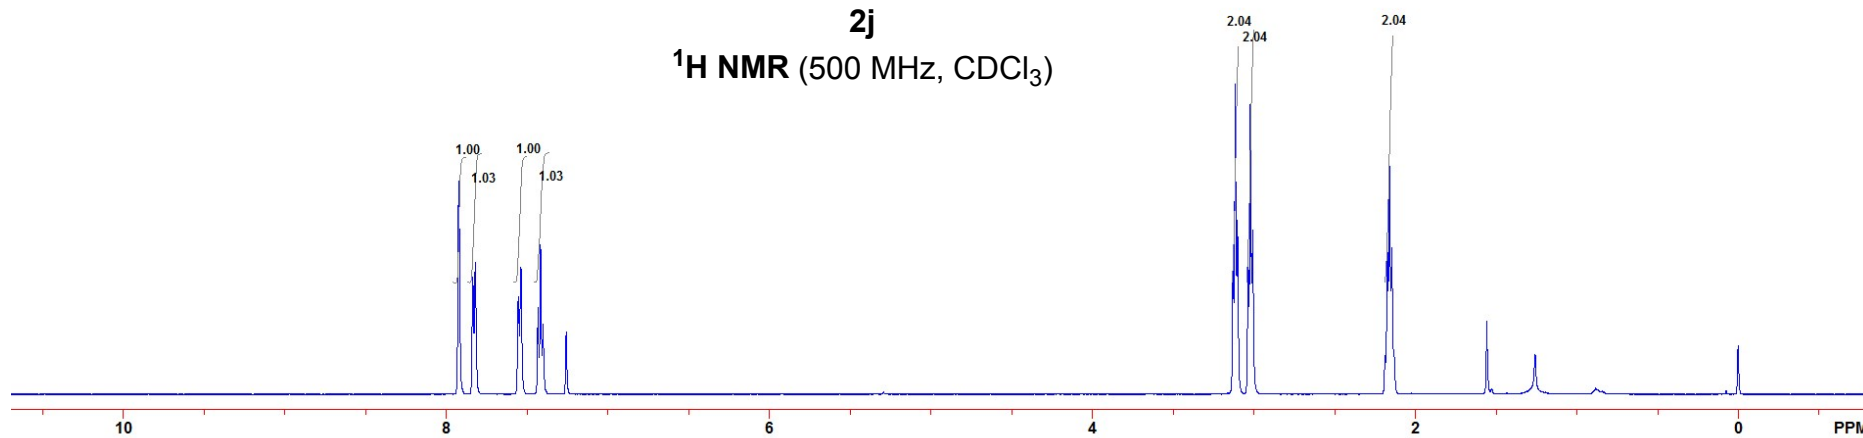



197.293

138.205  
135.100  
134.649  
133.218  
132.214  
130.028  
129.779  
128.130  
127.344  
126.037

77.249  
77.000  
76.743

36.451

29.309

23.575

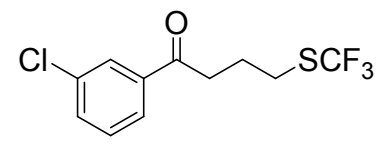

**2j**

**<sup>13</sup>C NMR (125 MHz, CDCl<sub>3</sub>)**

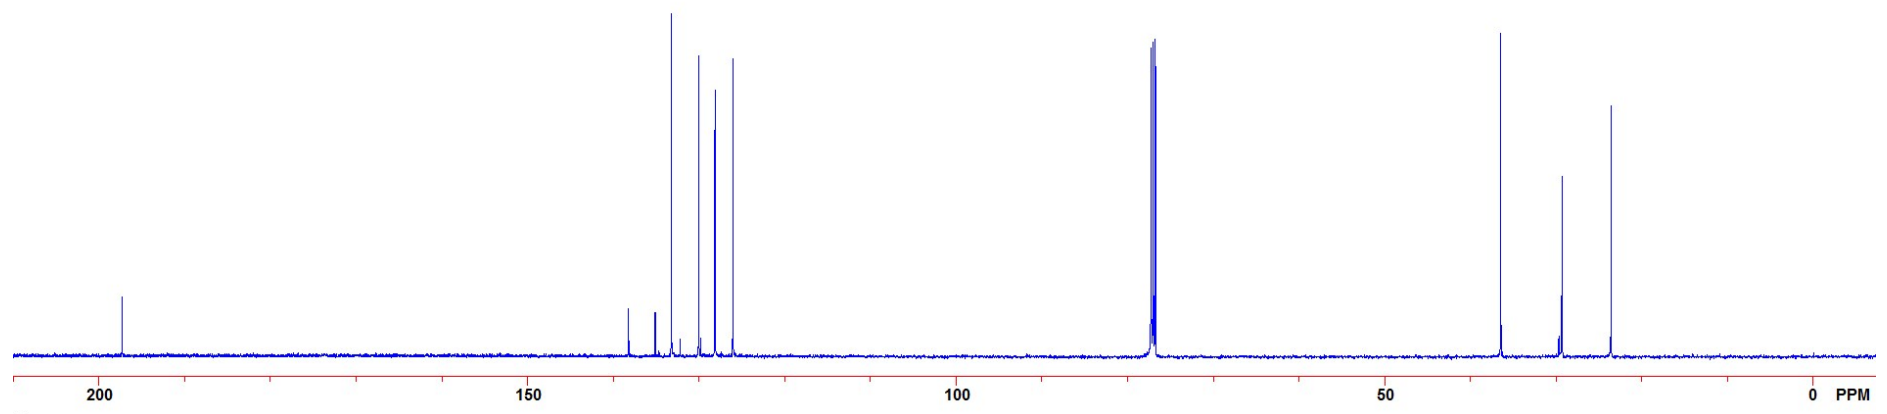

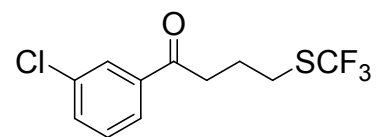

**2j**

**<sup>19</sup>F NMR (282 MHz, CDCl<sub>3</sub>)**

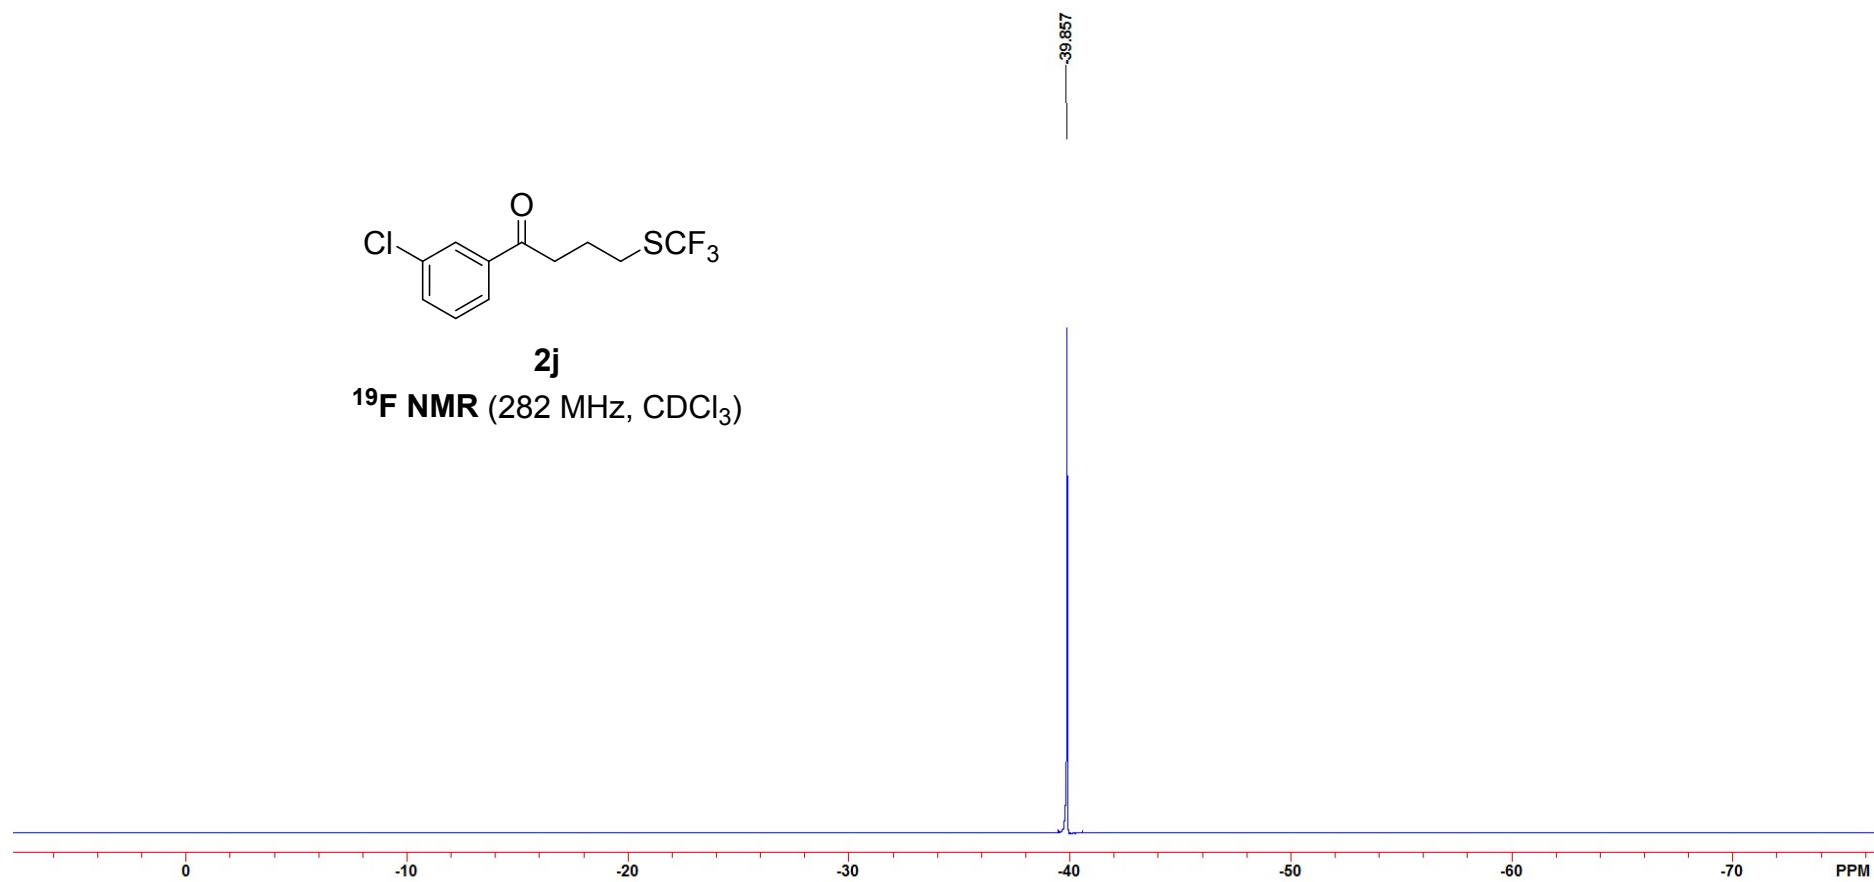

8.034  
8.028  
7.797  
7.790  
7.769  
7.762  
7.572  
7.544  
7.263

3.124  
3.101  
3.078  
3.045  
3.021  
2.998

2.204  
2.180  
2.157  
2.134  
2.111

0.000

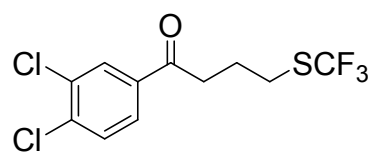

**2k**

**<sup>1</sup>H NMR (300 MHz, CDCl<sub>3</sub>)**

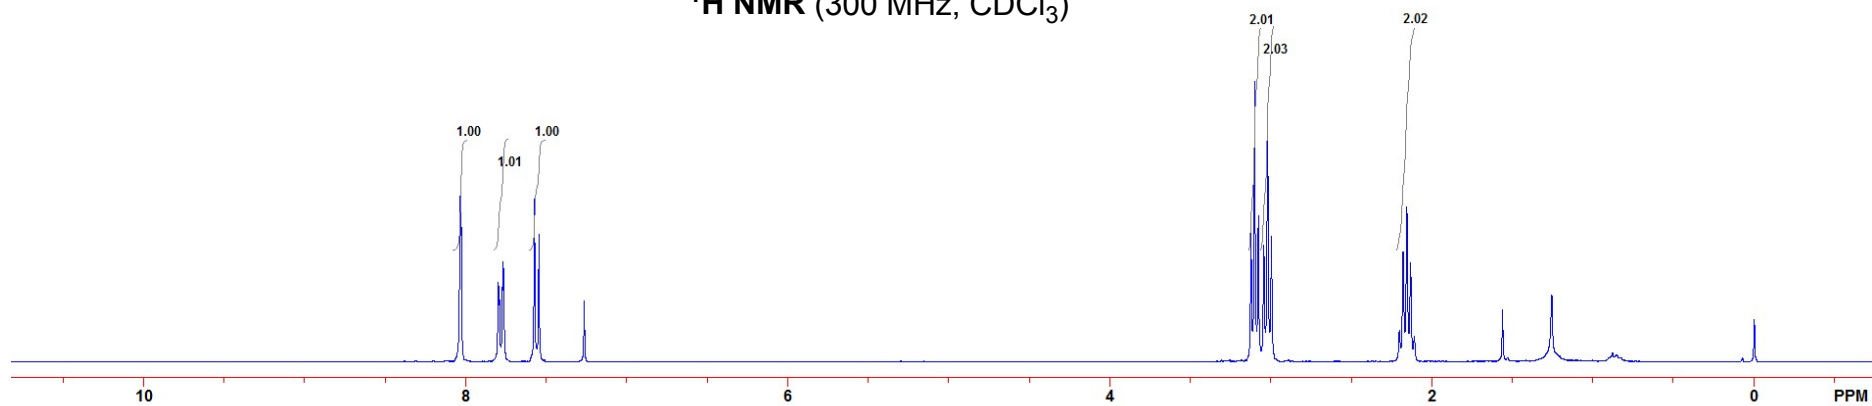

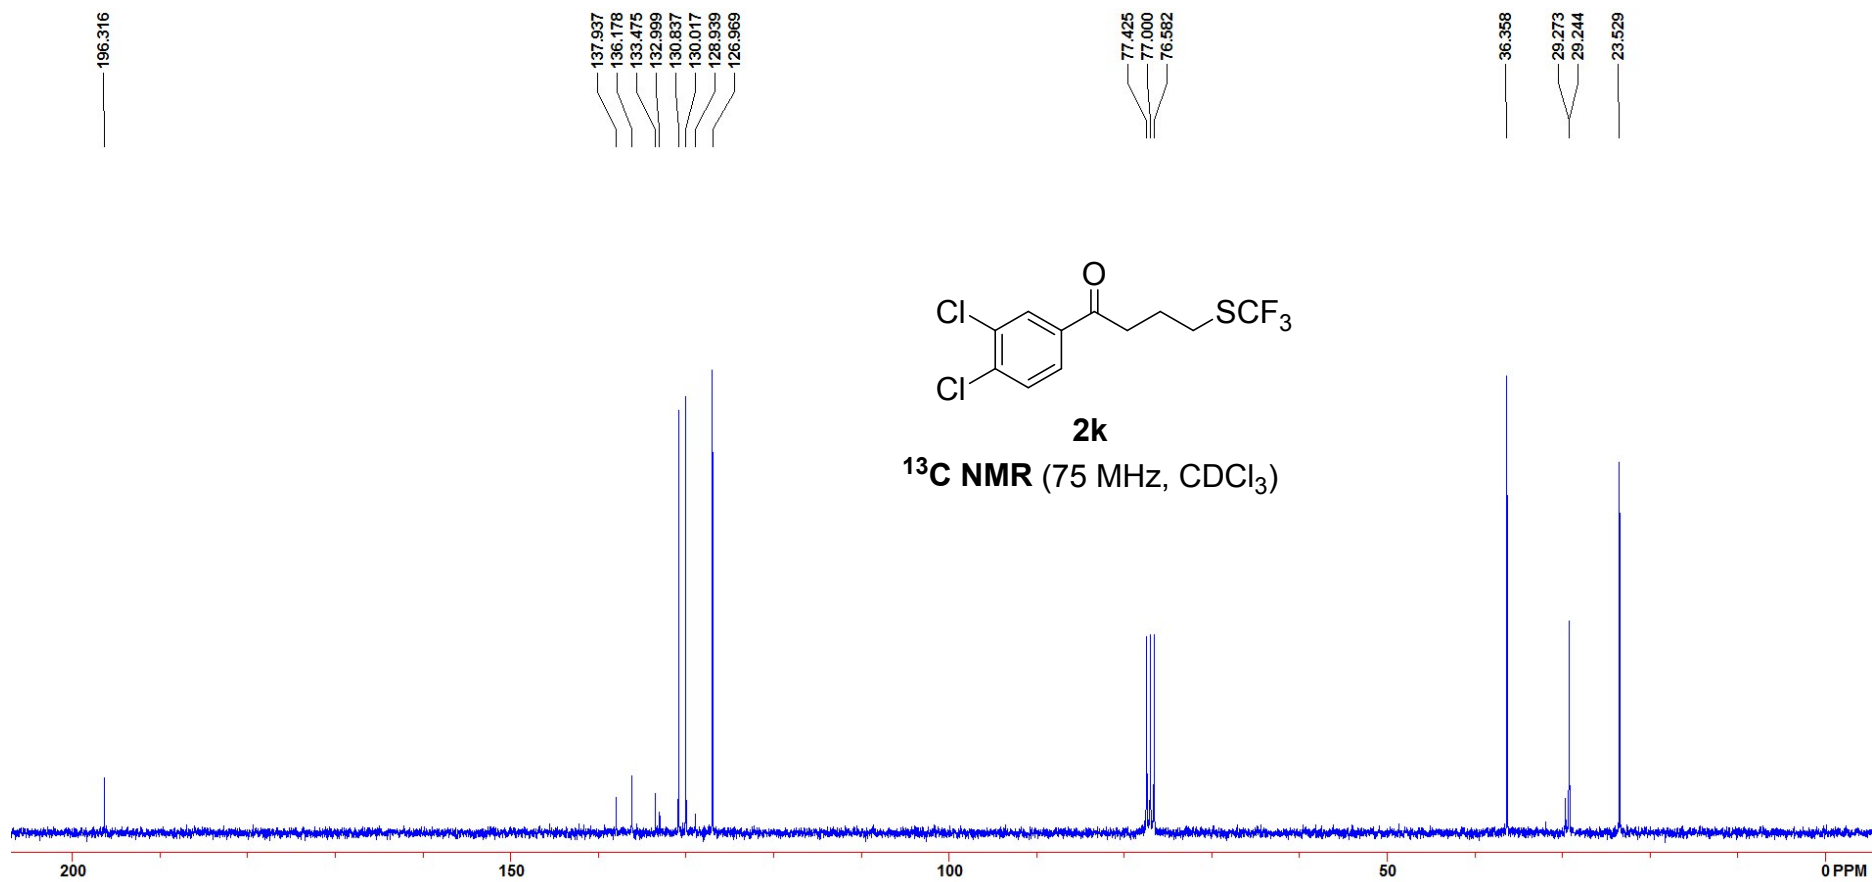

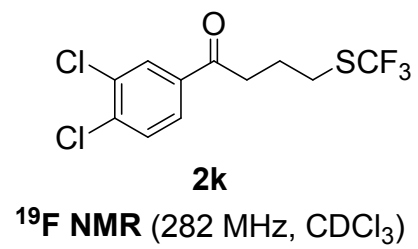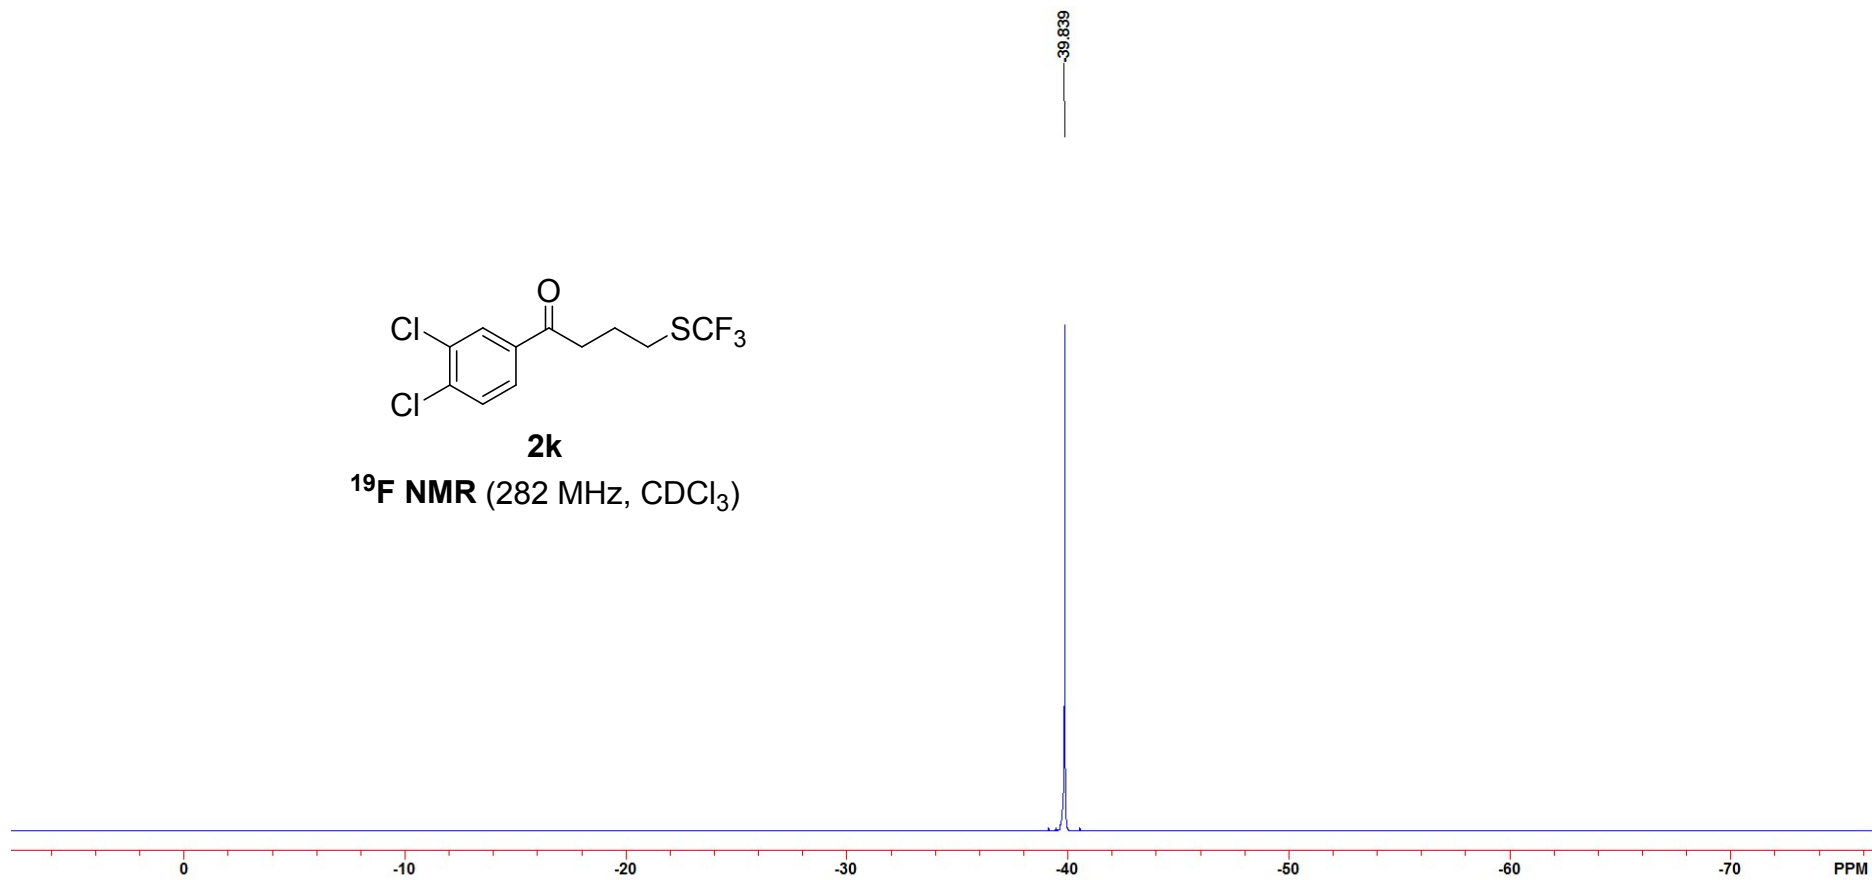

7.738  
7.725  
7.657  
7.641  
7.260  
7.156  
7.143  
7.139  
7.126

3.100  
3.077  
3.054  
3.041  
3.017  
2.993

2.207  
2.183  
2.160  
2.137  
2.113

0.000

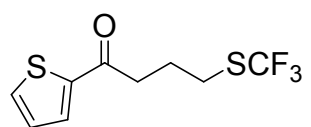

**2I**

**<sup>1</sup>H NMR (300 MHz, CDCl<sub>3</sub>)**

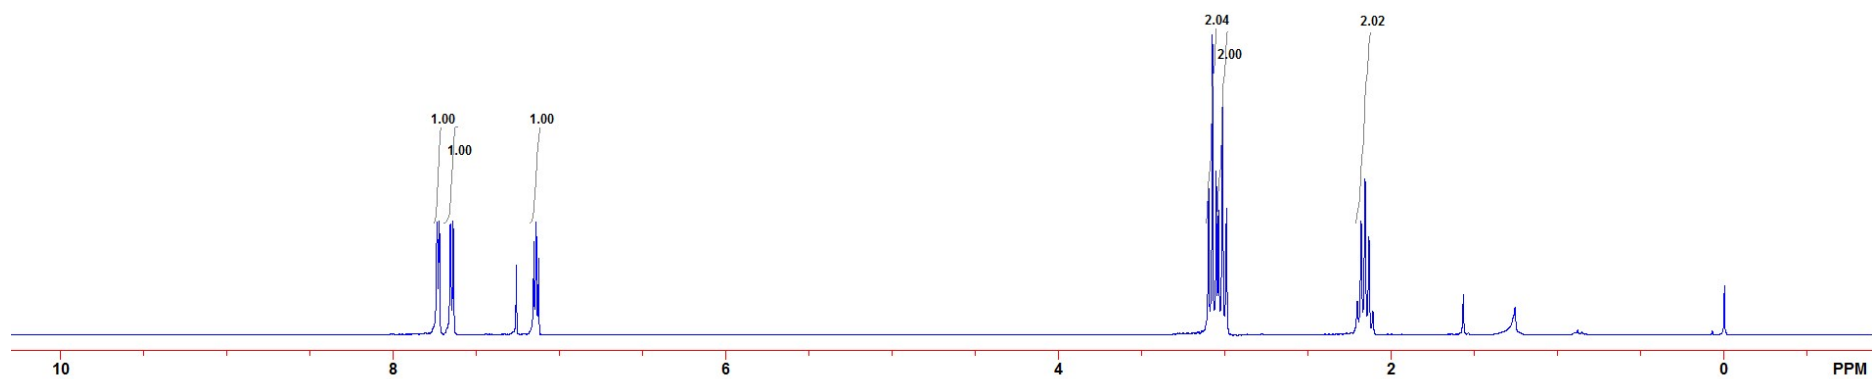

191.512

143.915

133.770

131.903

129.802

128.161

77.257

77.000

76.743

37.050

29.348

24.019

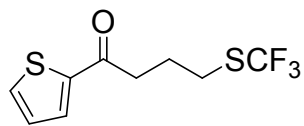

**21**

**<sup>13</sup>C NMR (125 MHz, CDCl<sub>3</sub>)**

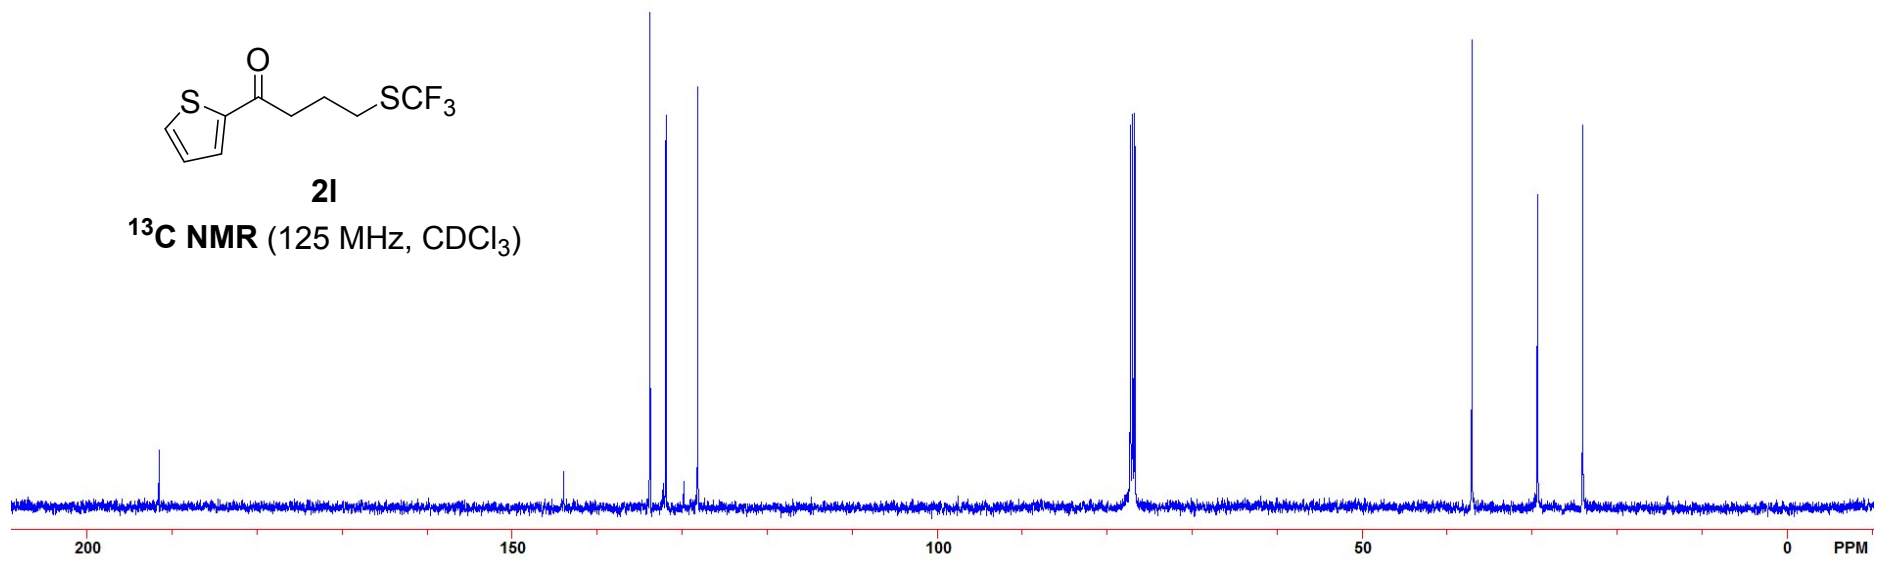

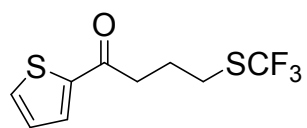

**21**

**<sup>19</sup>F NMR (282 MHz, CDCl<sub>3</sub>)**

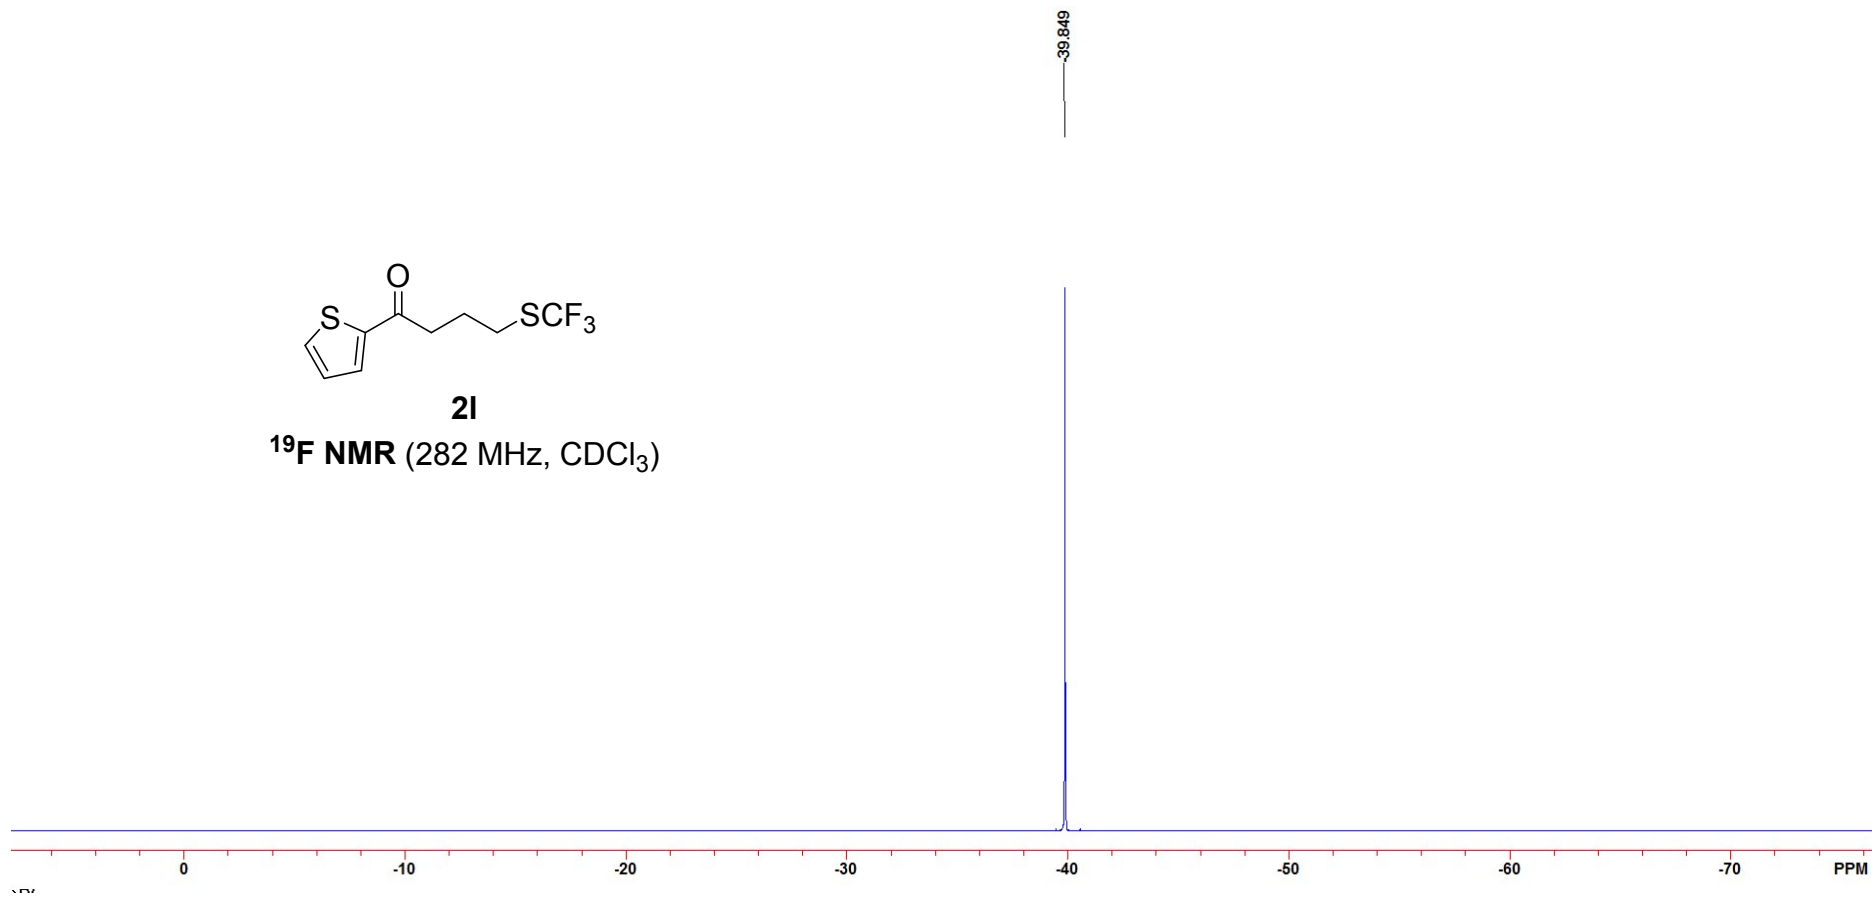



7.972  
7.948  
7.601  
7.576  
7.552  
7.496  
7.470  
7.446  
7.257

3.162  
3.139  
3.116  
3.049  
3.026  
3.002

2.209  
2.186  
2.163  
2.140  
2.116

0.000

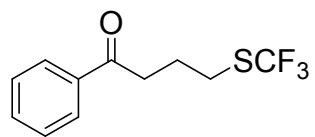

**2m**

**<sup>1</sup>H NMR (300 MHz, CDCl<sub>3</sub>)**

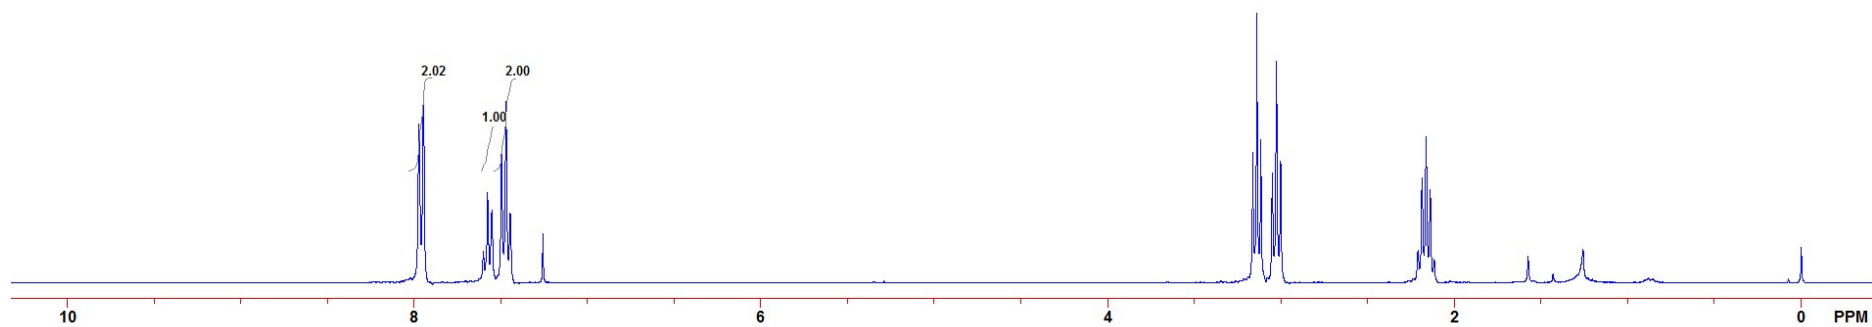

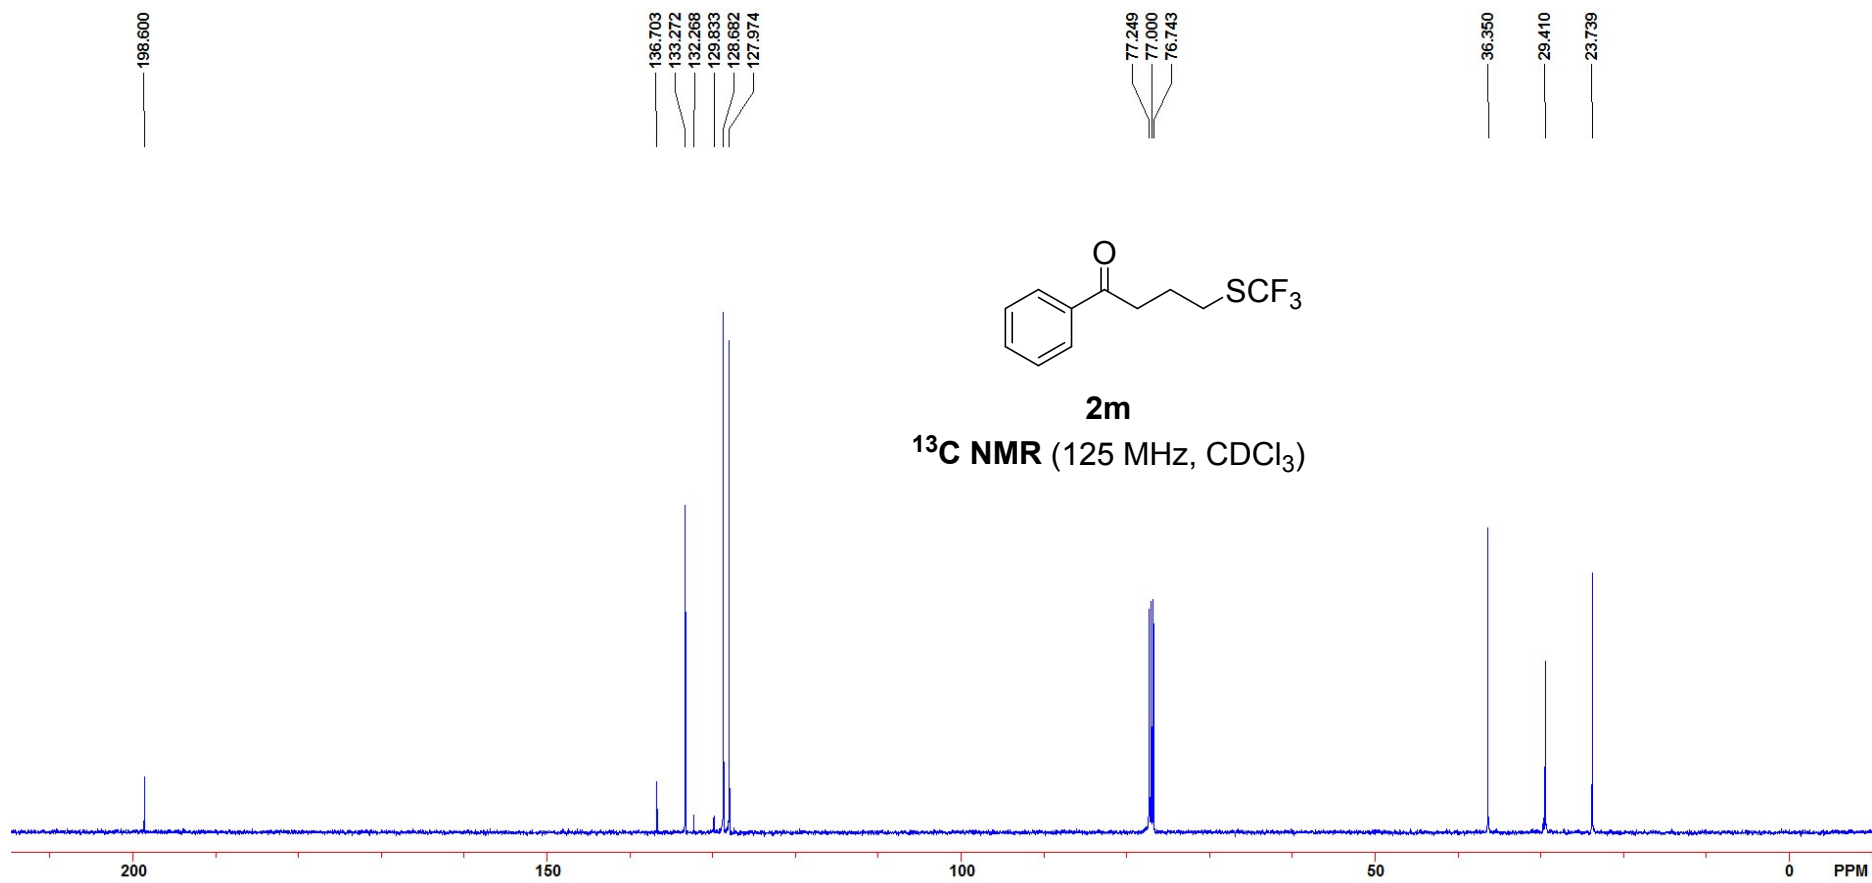

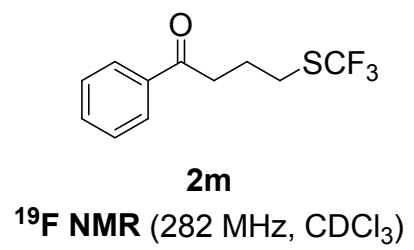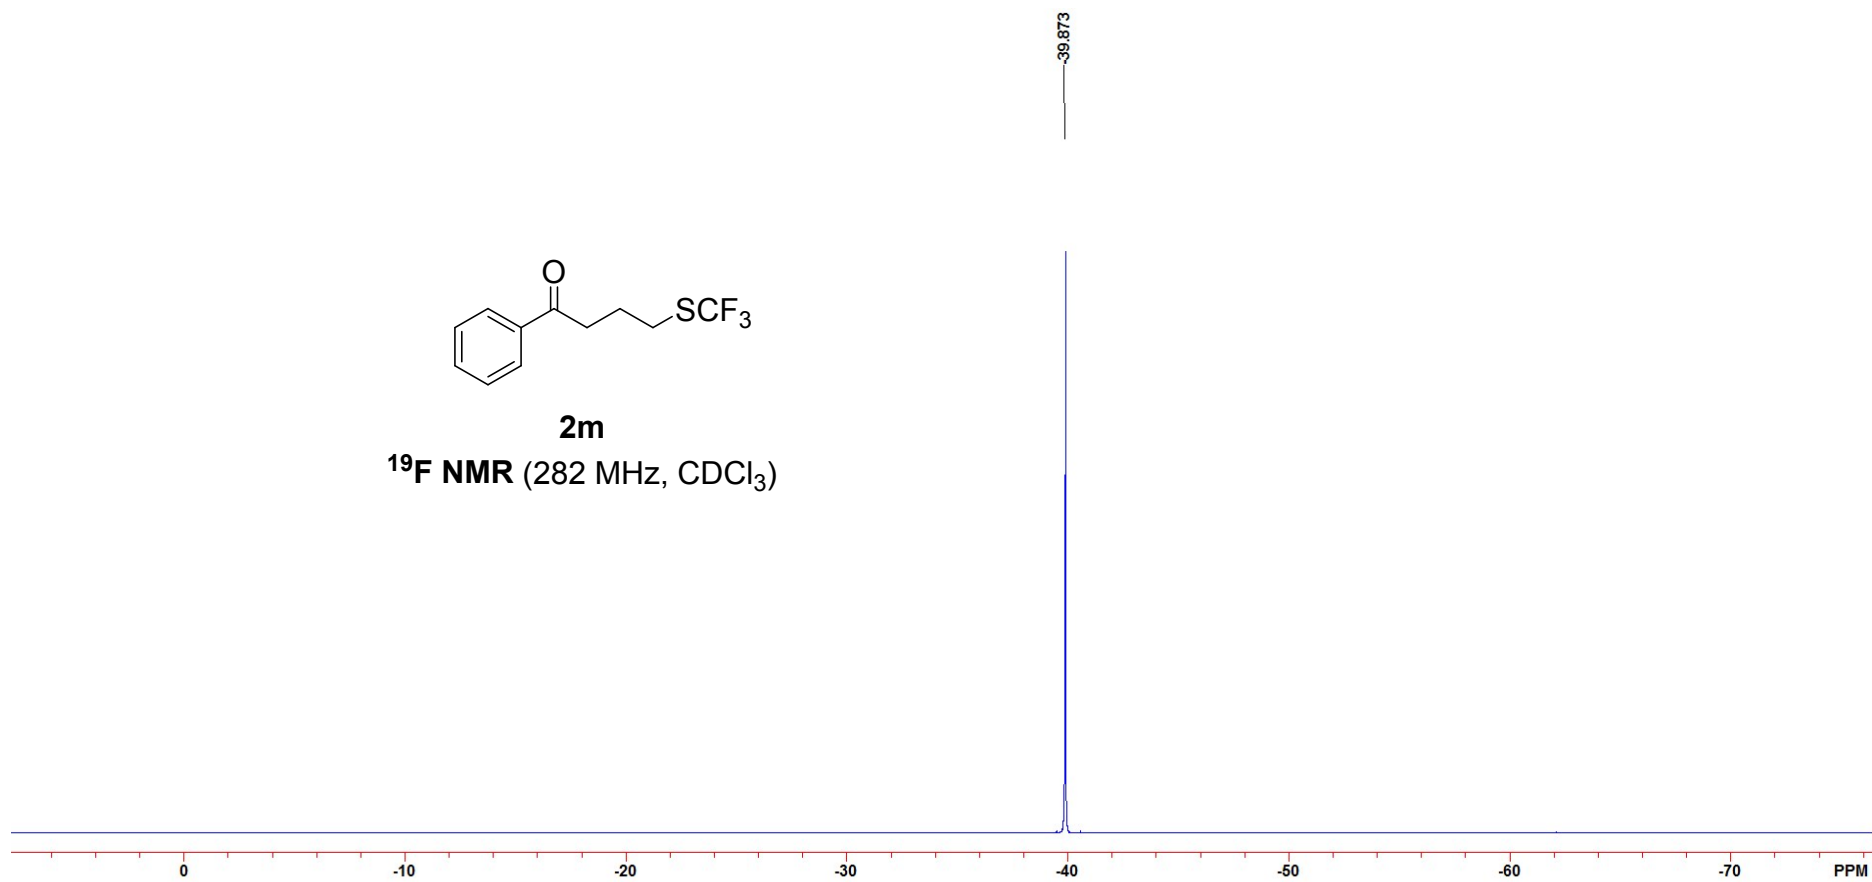

7.267

2.925  
2.911  
2.896  
2.604  
2.590  
2.577  
2.355  
2.348  
2.333  
2.326  
2.318  
2.311  
2.304  
1.986  
1.972  
1.958  
1.944  
1.931  
1.844  
1.819  
1.797  
1.773  
1.687  
1.663  
1.376  
1.352  
1.326  
1.309  
1.292  
1.267  
1.261  
1.242  
1.212  
1.188  
-0.000

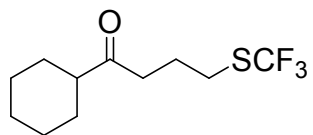

**2n**

**<sup>1</sup>H NMR (500 MHz, CDCl<sub>3</sub>)**

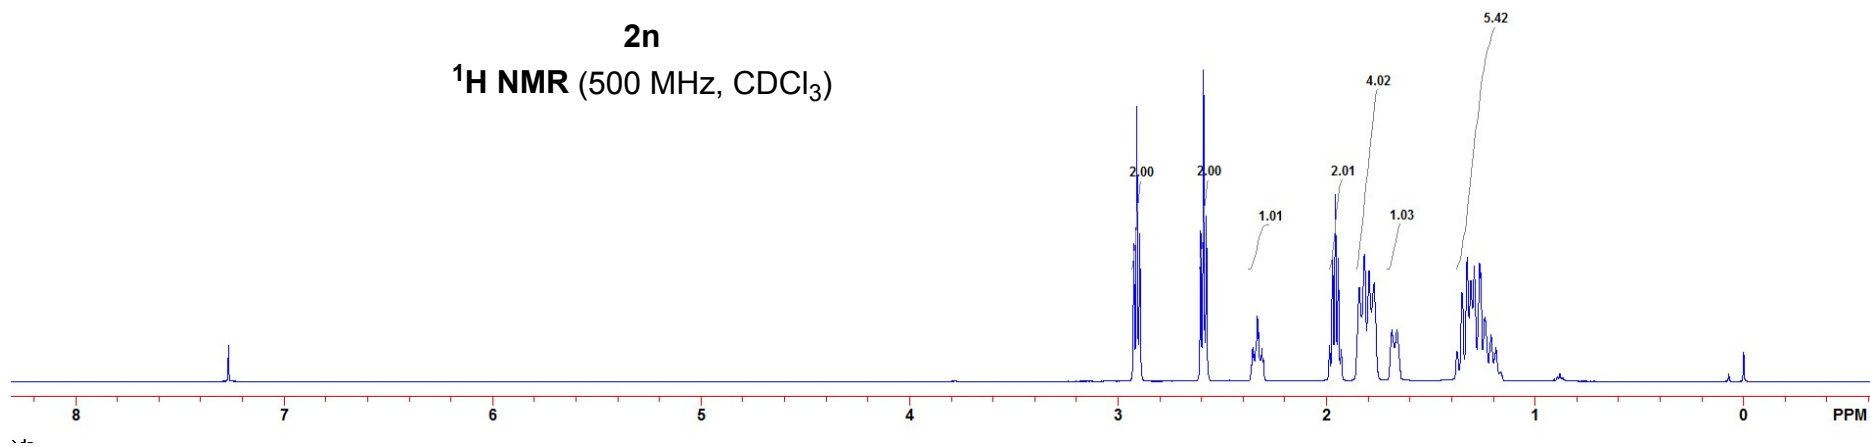

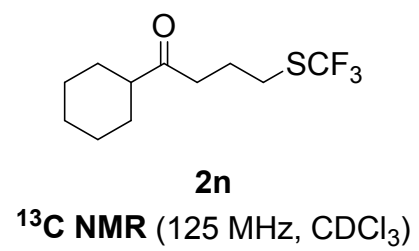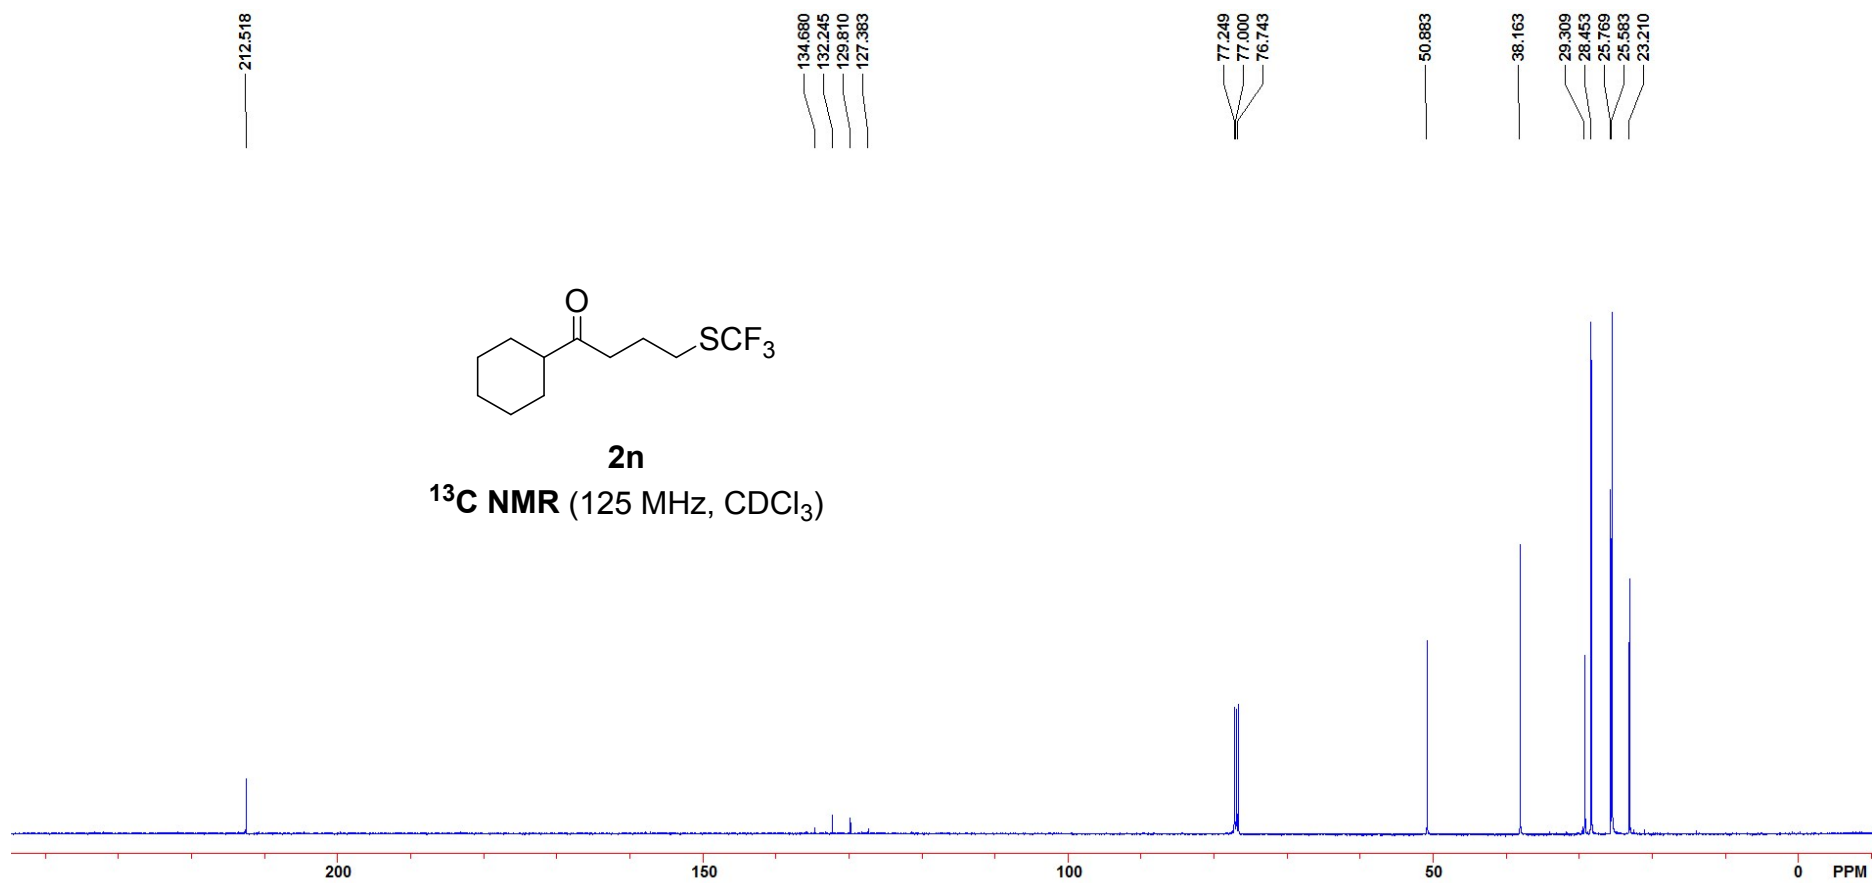

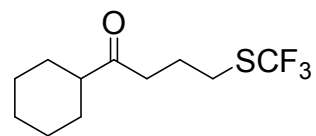

**2n**

**<sup>19</sup>F NMR (282 MHz, CDCl<sub>3</sub>)**

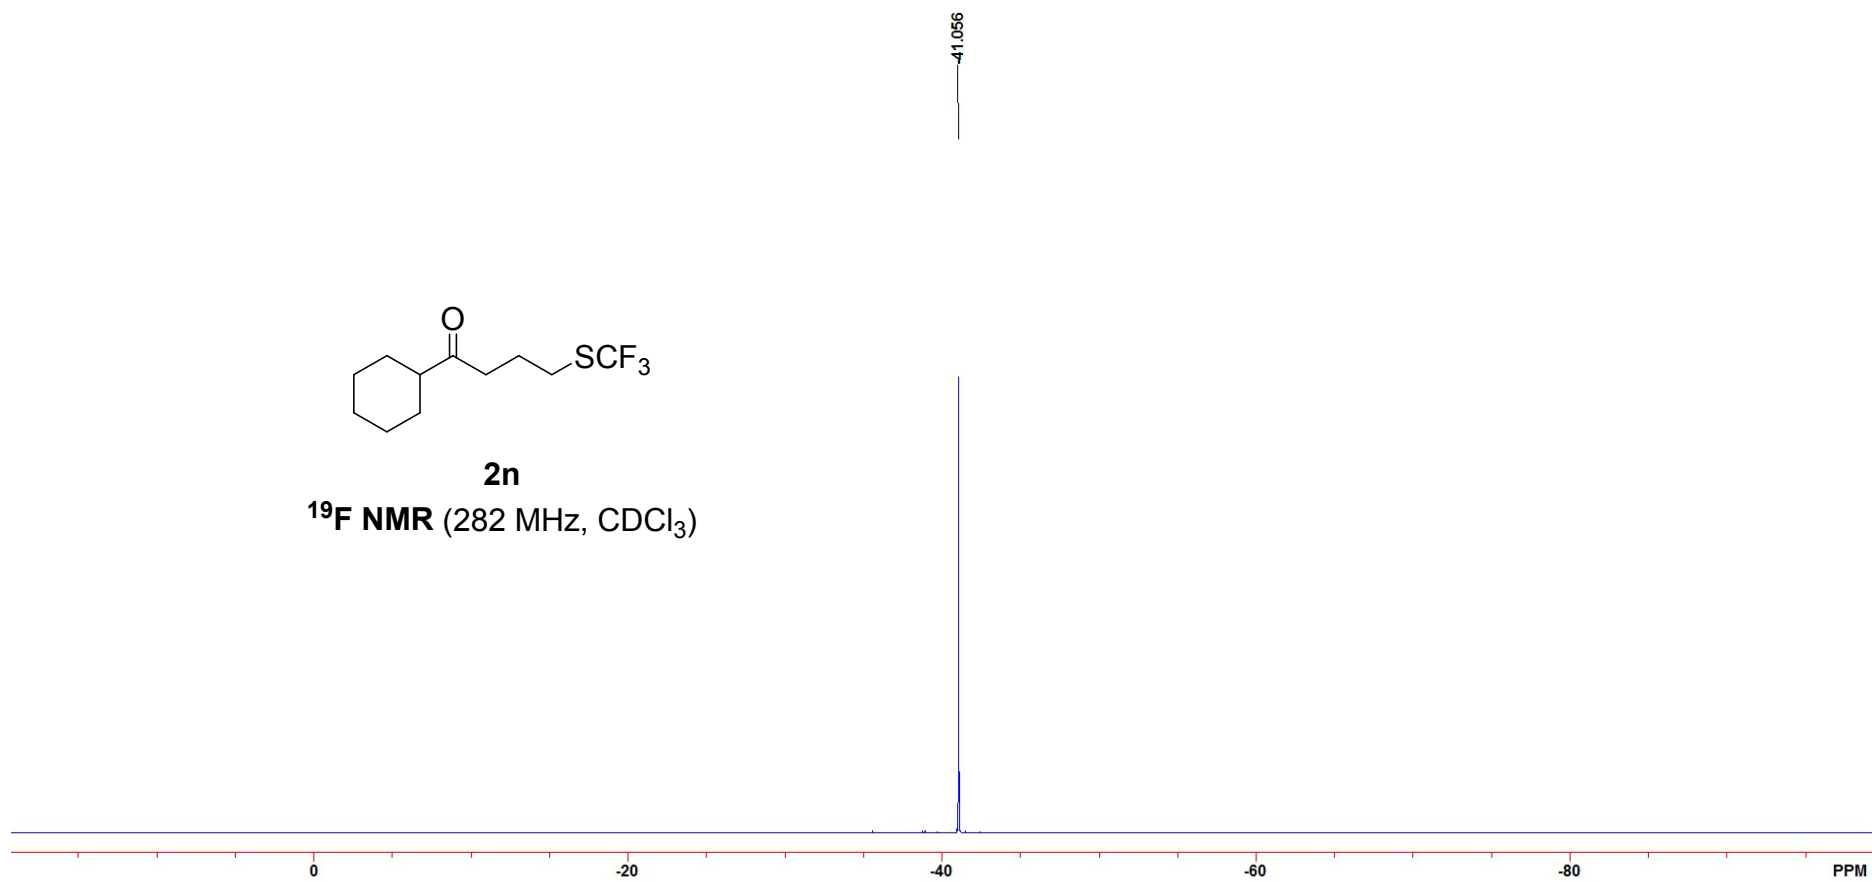

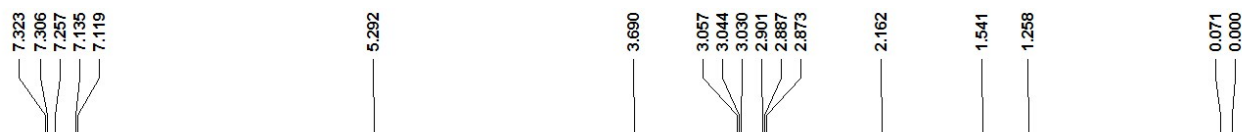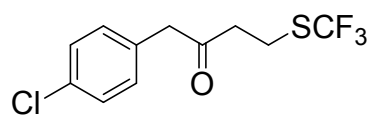

**4a**

**<sup>1</sup>H NMR (500 MHz, CDCl<sub>3</sub>)**

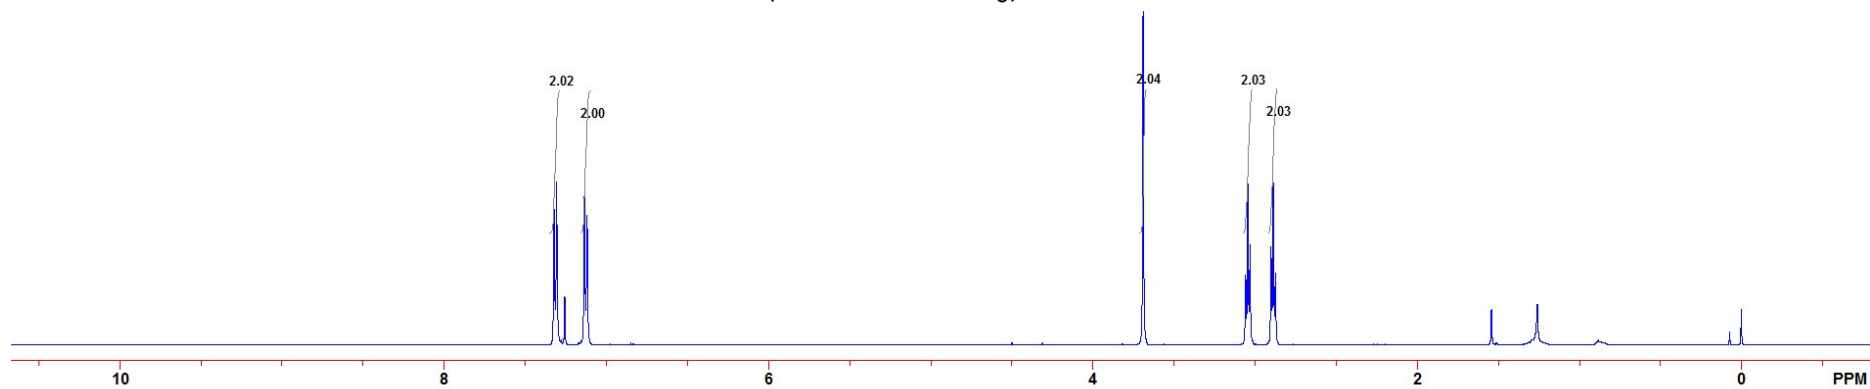

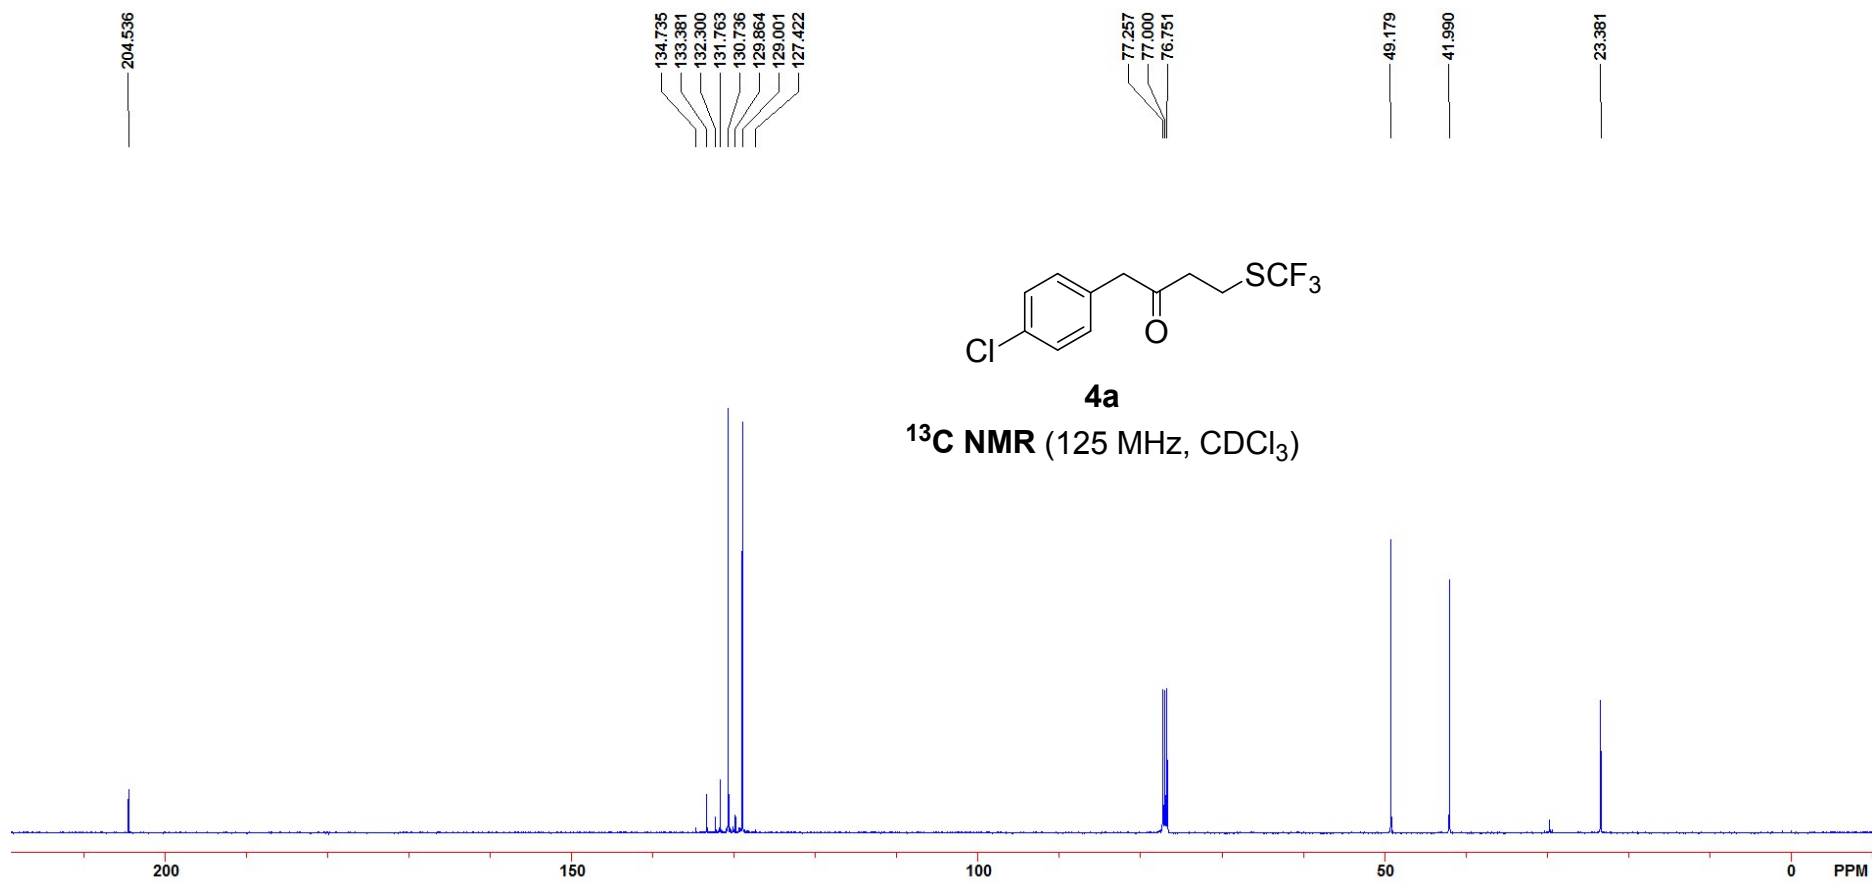



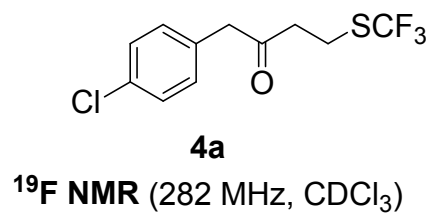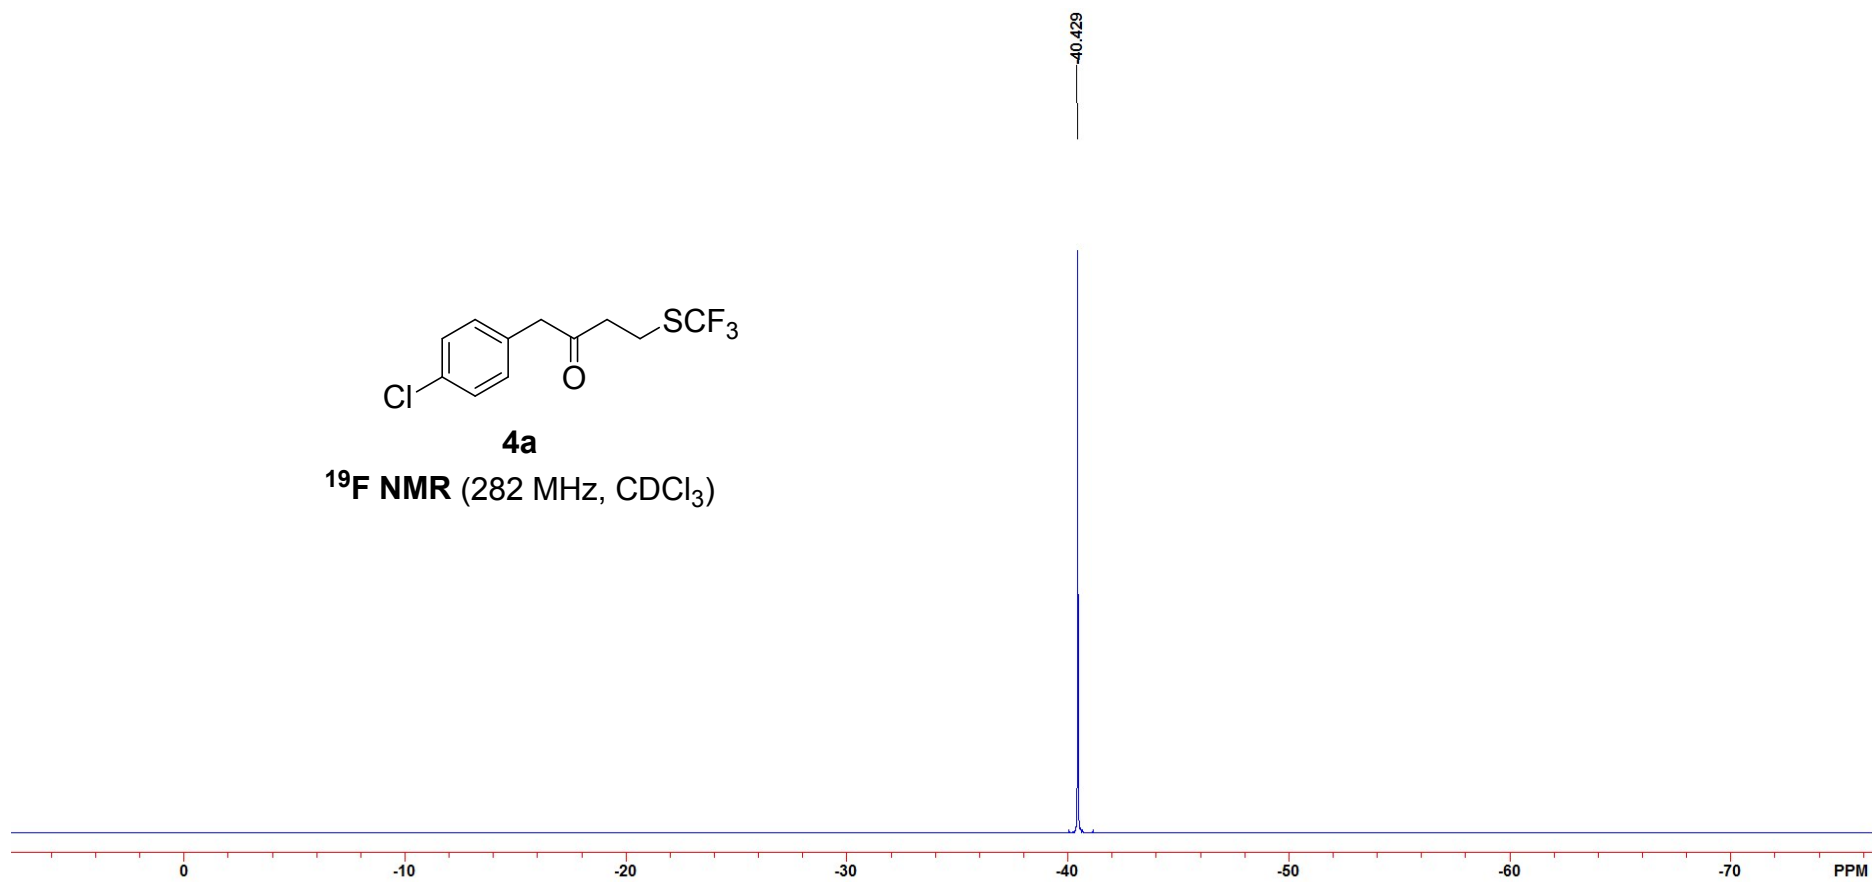

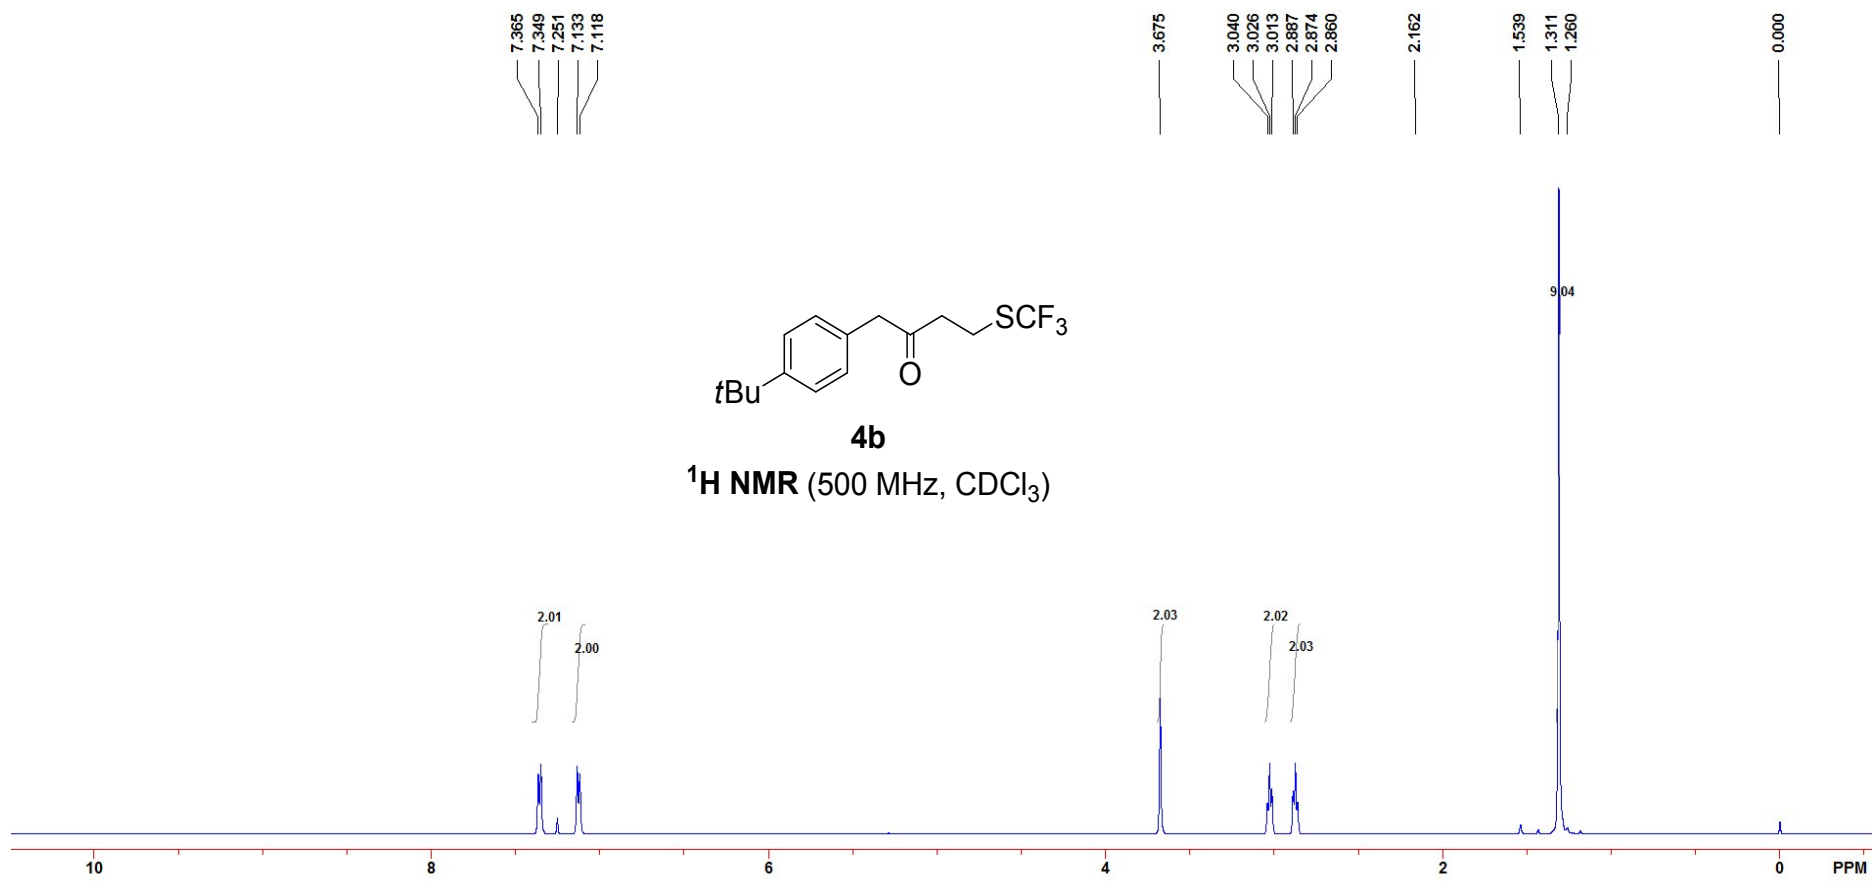

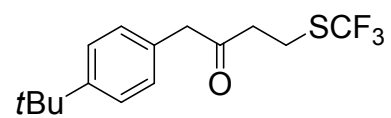

**4b**

<sup>13</sup>C NMR (125 MHz, CDCl<sub>3</sub>)

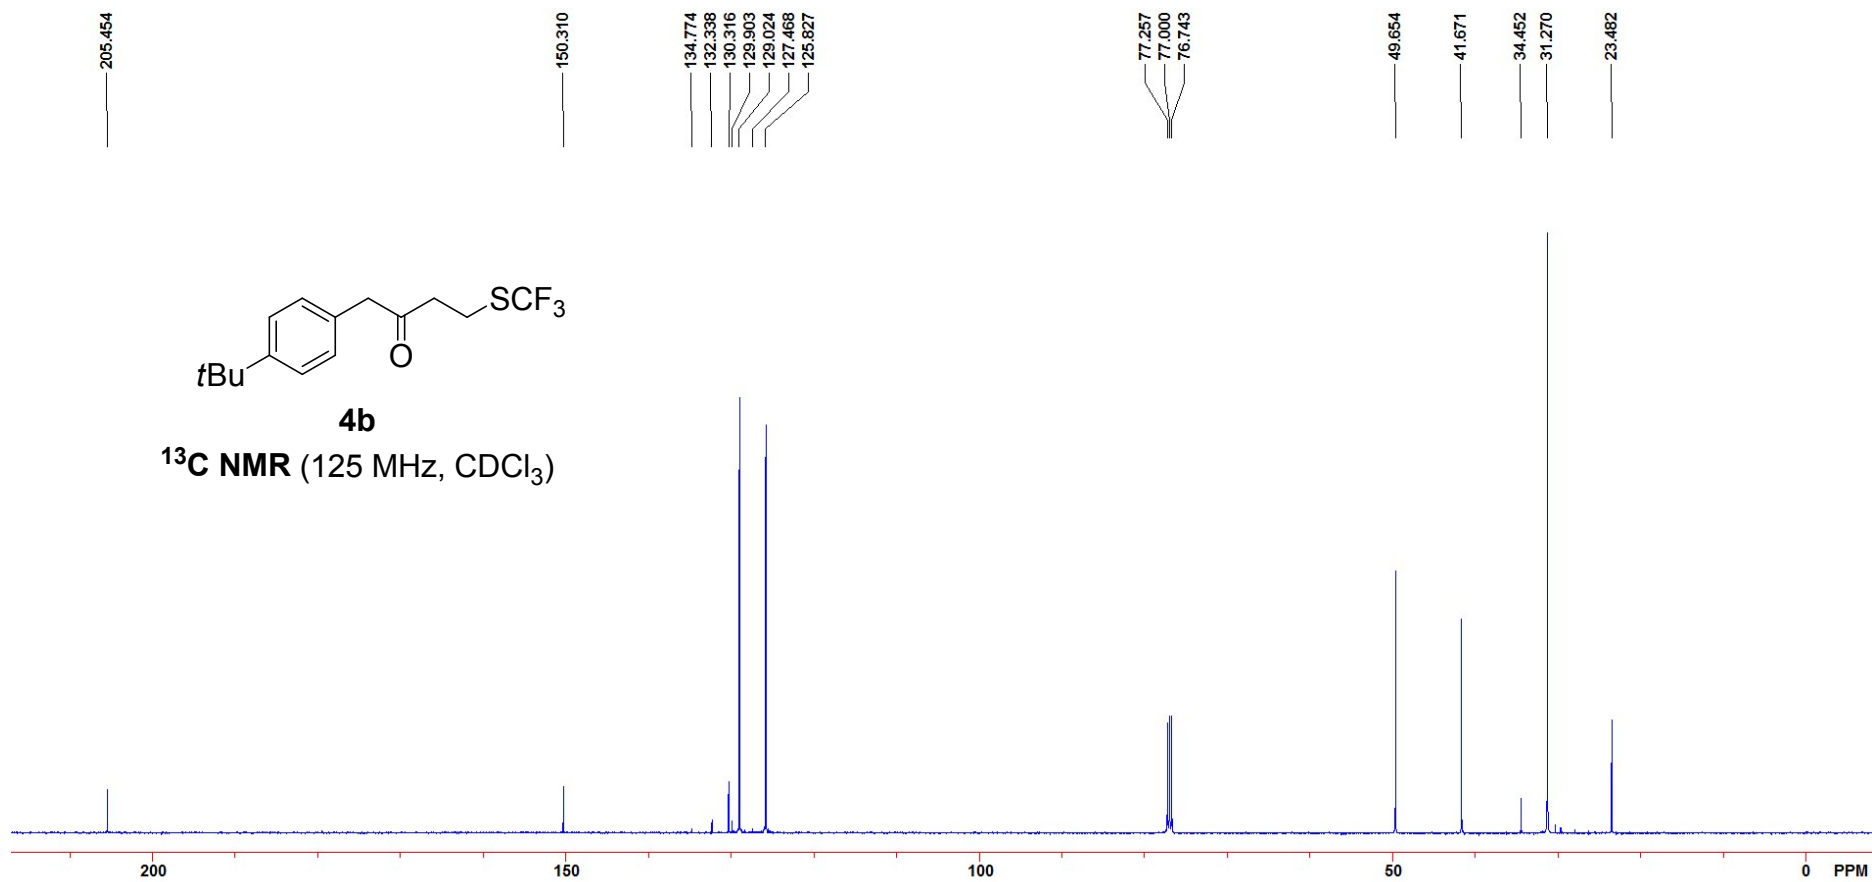

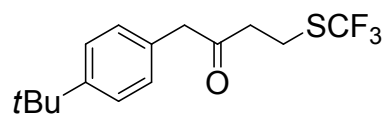

**4b**

**<sup>19</sup>F NMR (282 MHz, CDCl<sub>3</sub>)**

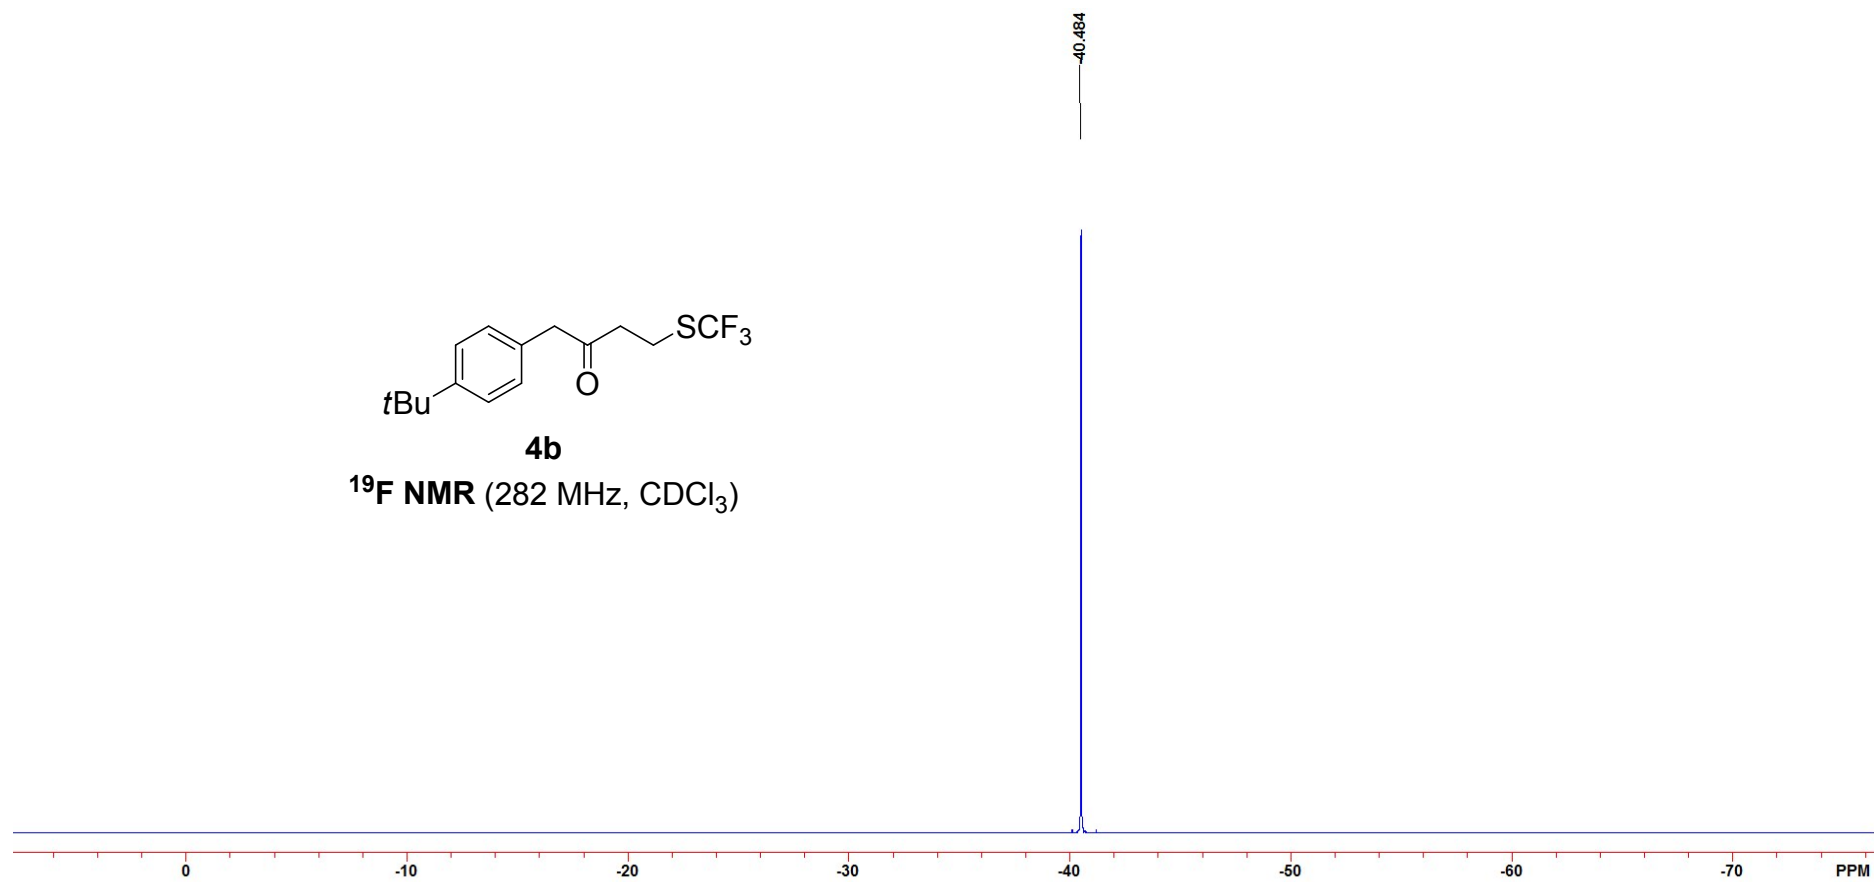

7.294  
7.279  
7.265  
7.251  
7.209  
7.195  
7.177

3.066  
3.052  
3.039  
2.934  
2.920  
2.904  
2.825  
2.812  
2.799  
2.772  
2.757  
2.742  
2.161  
1.533

0.000

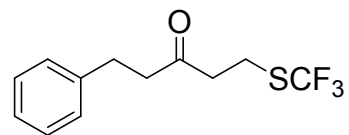

**4c**

**<sup>1</sup>H NMR (500 MHz, CDCl<sub>3</sub>)**

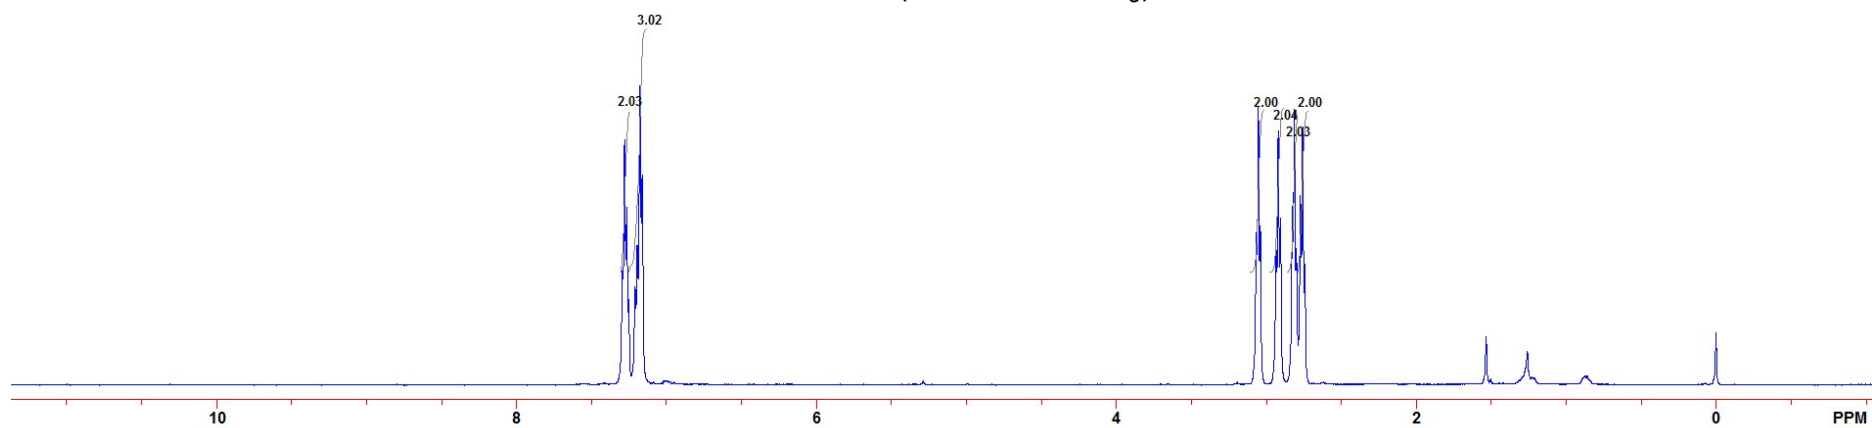

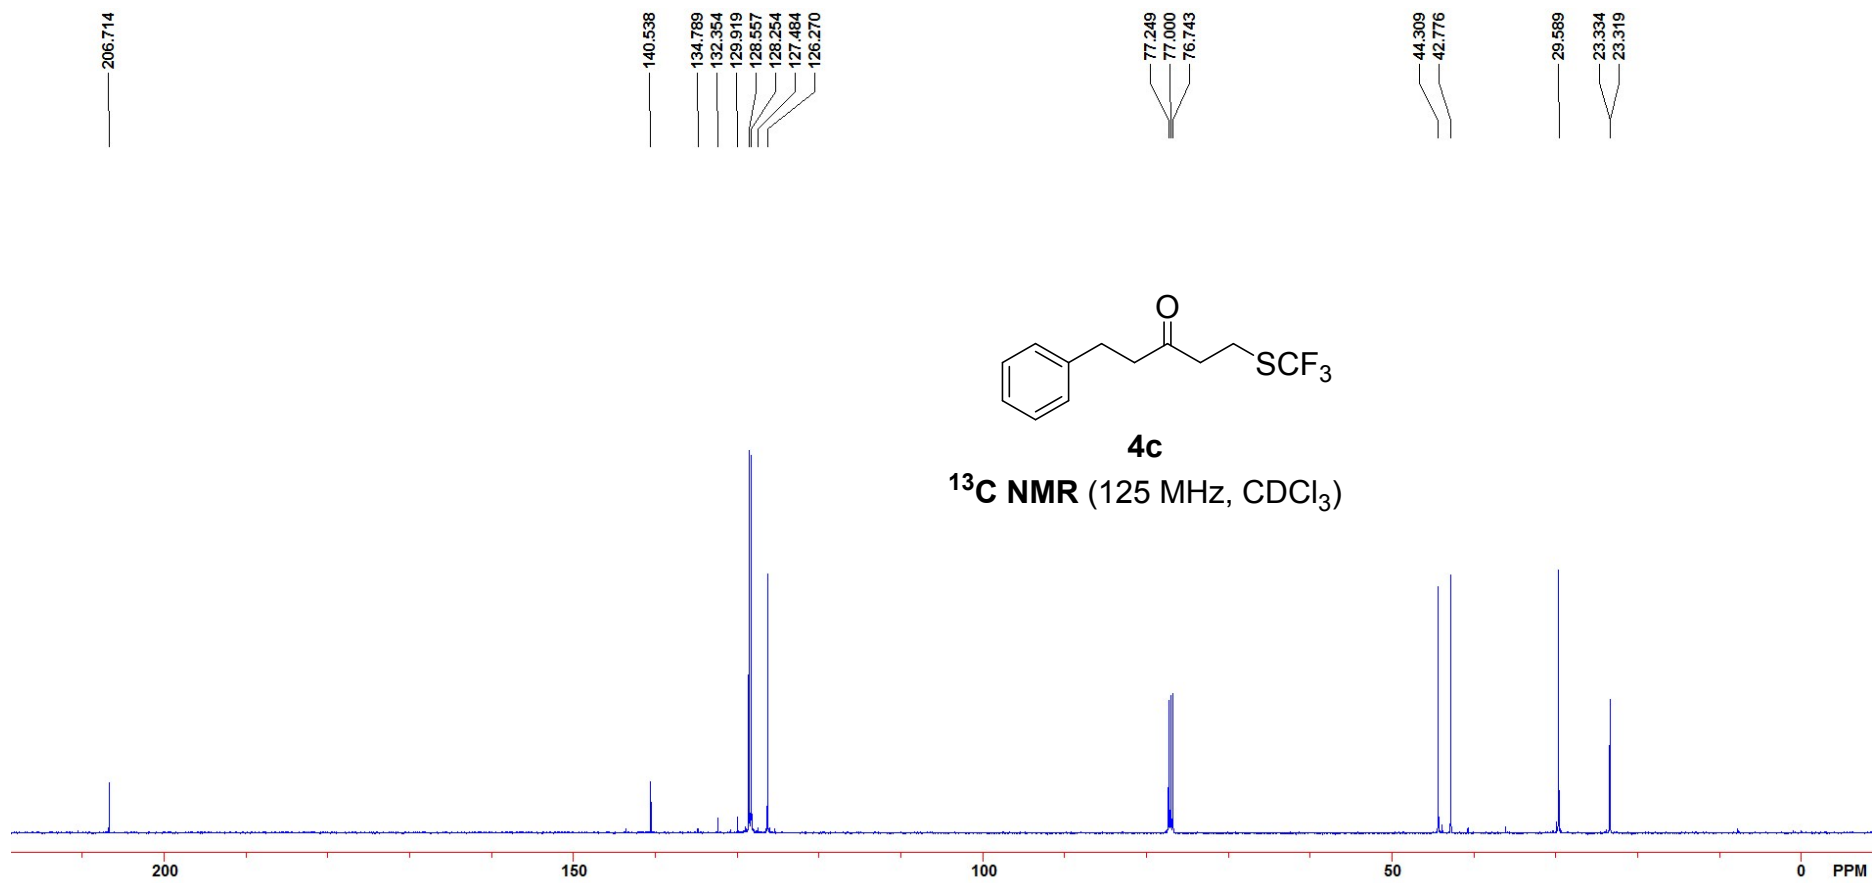

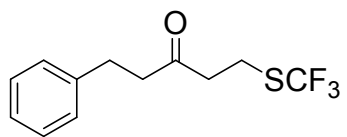

**4c**

**<sup>19</sup>F NMR (282 MHz, CDCl<sub>3</sub>)**

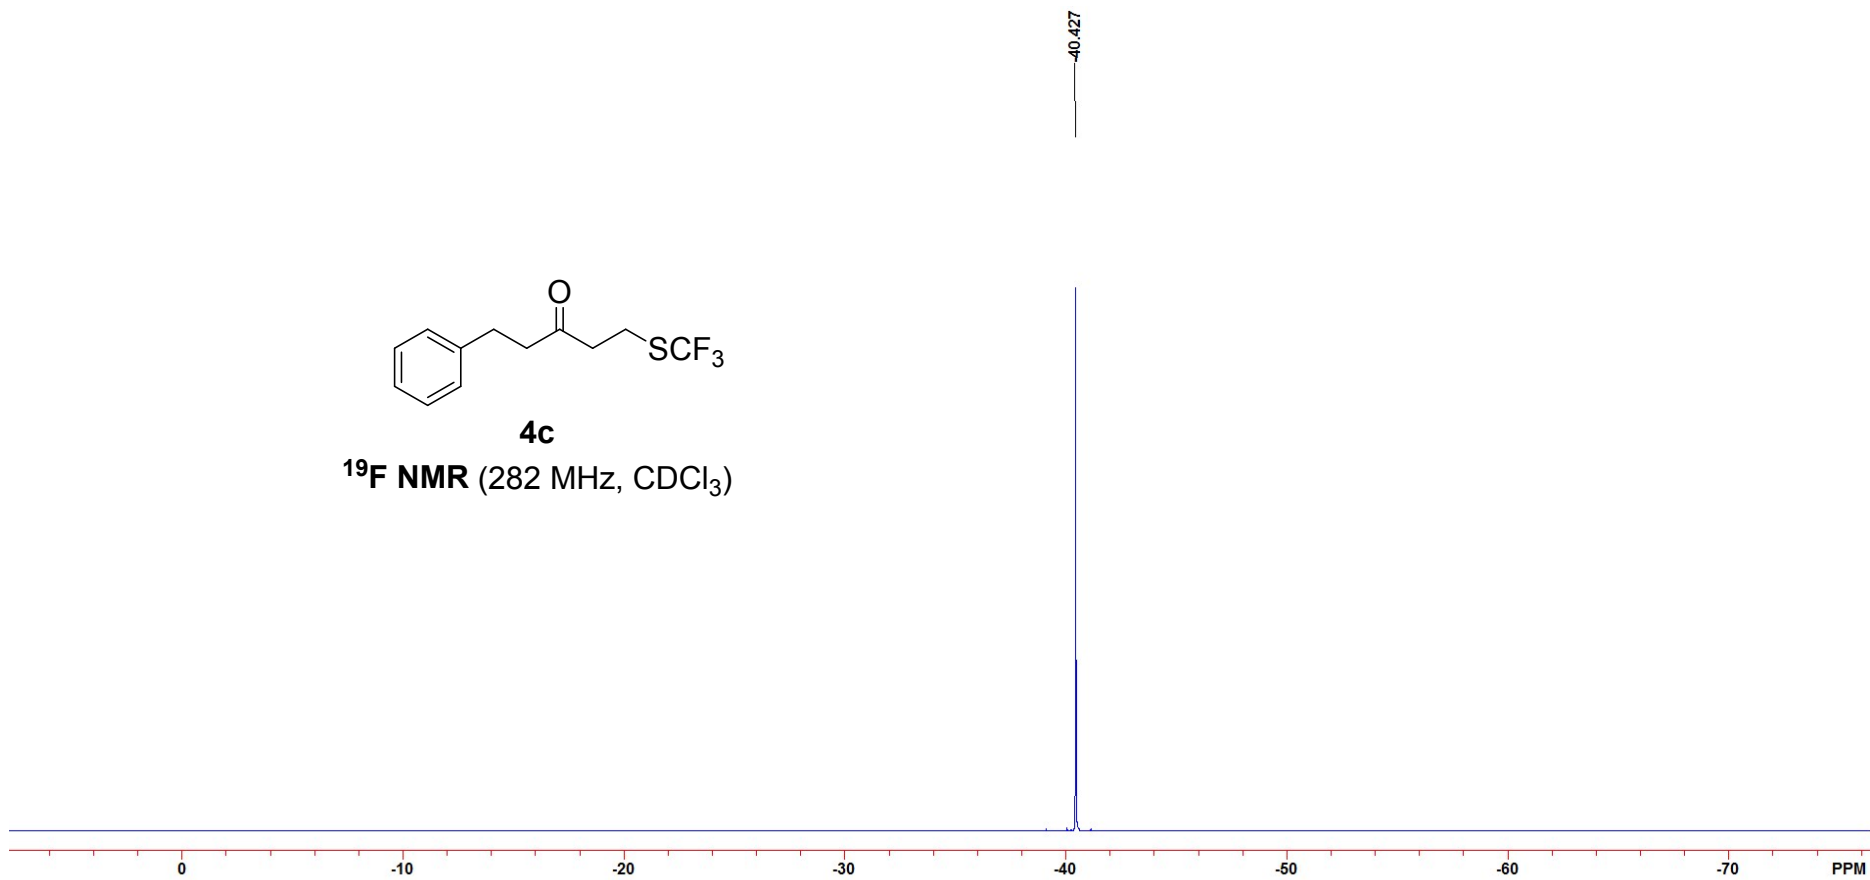

7.311  
7.295  
7.280  
7.260  
7.224  
7.210  
7.196  
7.182

3.560  
3.549  
3.546  
3.534  
3.523  
3.520  
3.508  
2.946  
2.931  
2.916  
2.896  
2.886  
2.861  
2.850  
2.798  
2.784  
2.770  
2.763  
2.754  
2.741  
1.765  
1.752  
1.737  
1.723  
1.710  
1.695  
1.680  
1.666  
1.651  
1.637  
1.023  
1.009  
0.994

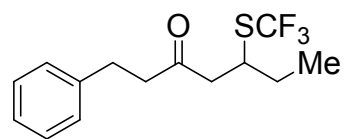

**4d**

**<sup>1</sup>H NMR (500 MHz, CDCl<sub>3</sub>)**

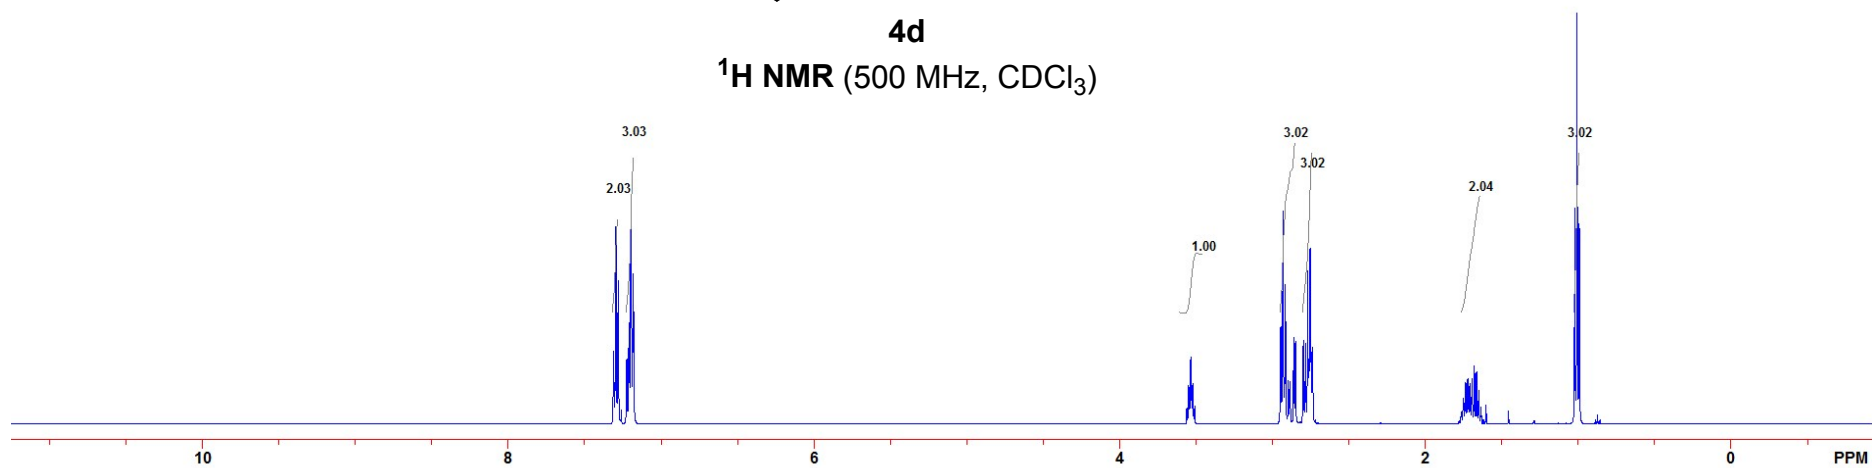



206.403

140.593  
134.750  
132.315  
129.872  
128.519  
128.254  
127.437  
126.216

77.249  
77.000  
76.743

48.168  
44.706  
42.418

29.550  
27.932

11.120

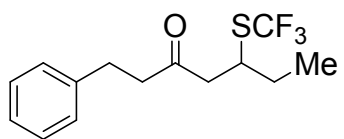

**4d**

**<sup>13</sup>C NMR (125 MHz, CDCl<sub>3</sub>)**

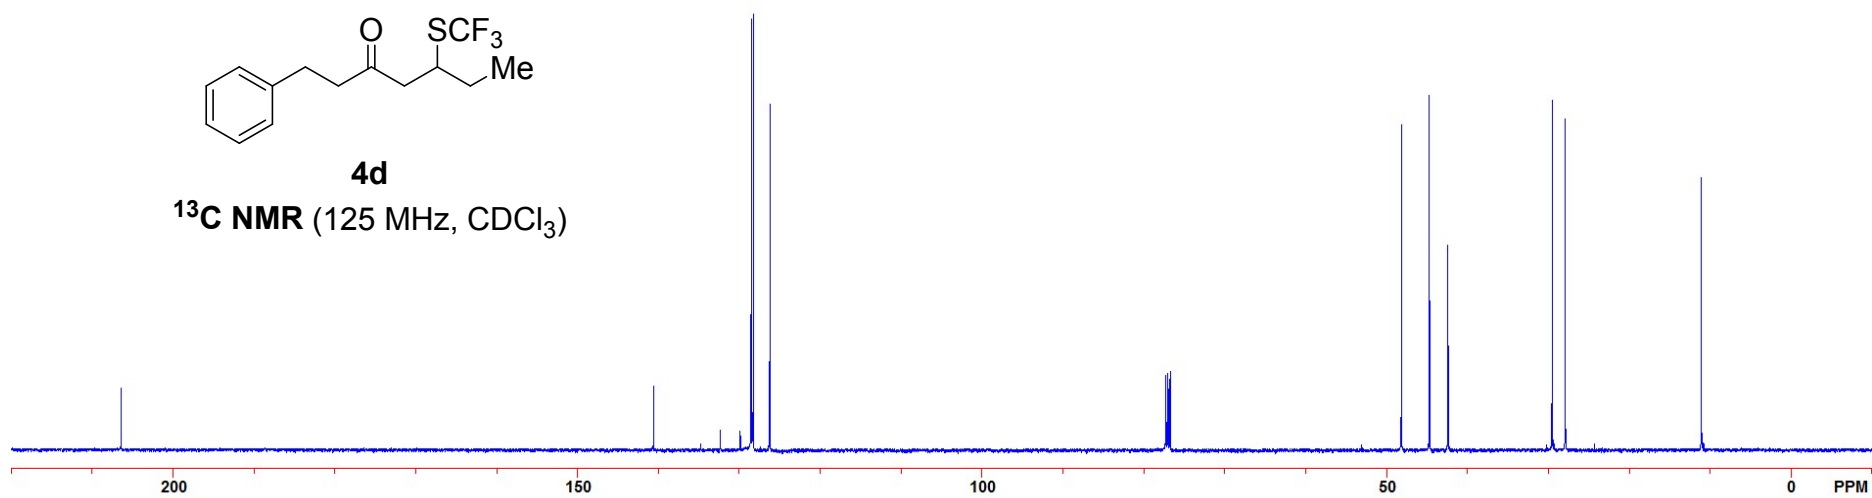

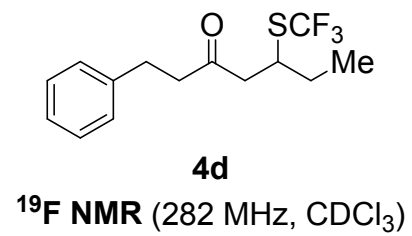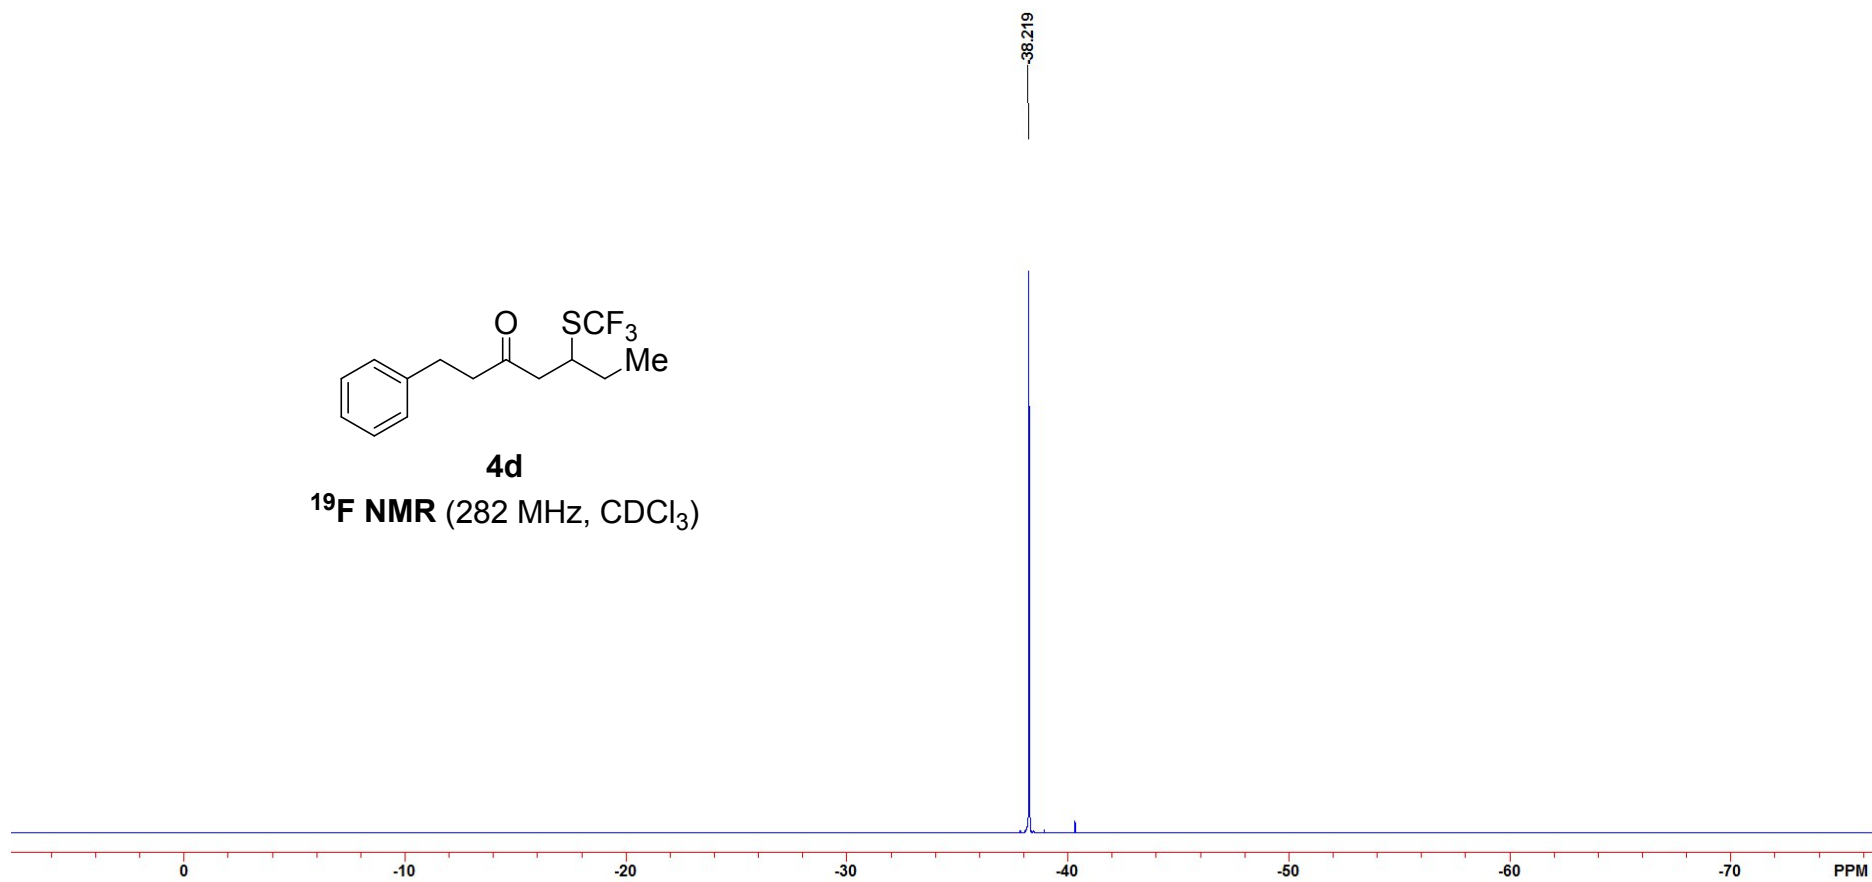

7.958  
7.942  
7.578  
7.564  
7.549  
7.480  
7.464  
7.449  
7.257

3.026  
3.012  
2.998  
2.947  
2.932  
2.918

1.888  
1.874  
1.871  
1.865  
1.857  
1.843  
1.826  
1.811  
1.796  
1.780

0.000

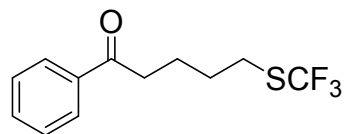

**4e**

**<sup>1</sup>H NMR (500 MHz, CDCl<sub>3</sub>)**

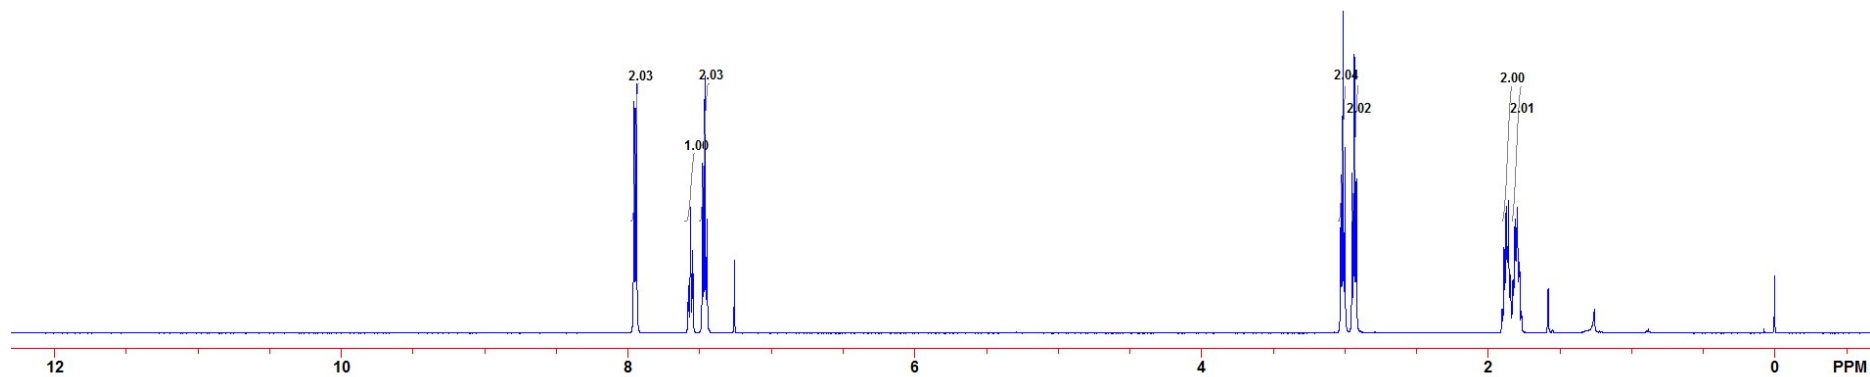

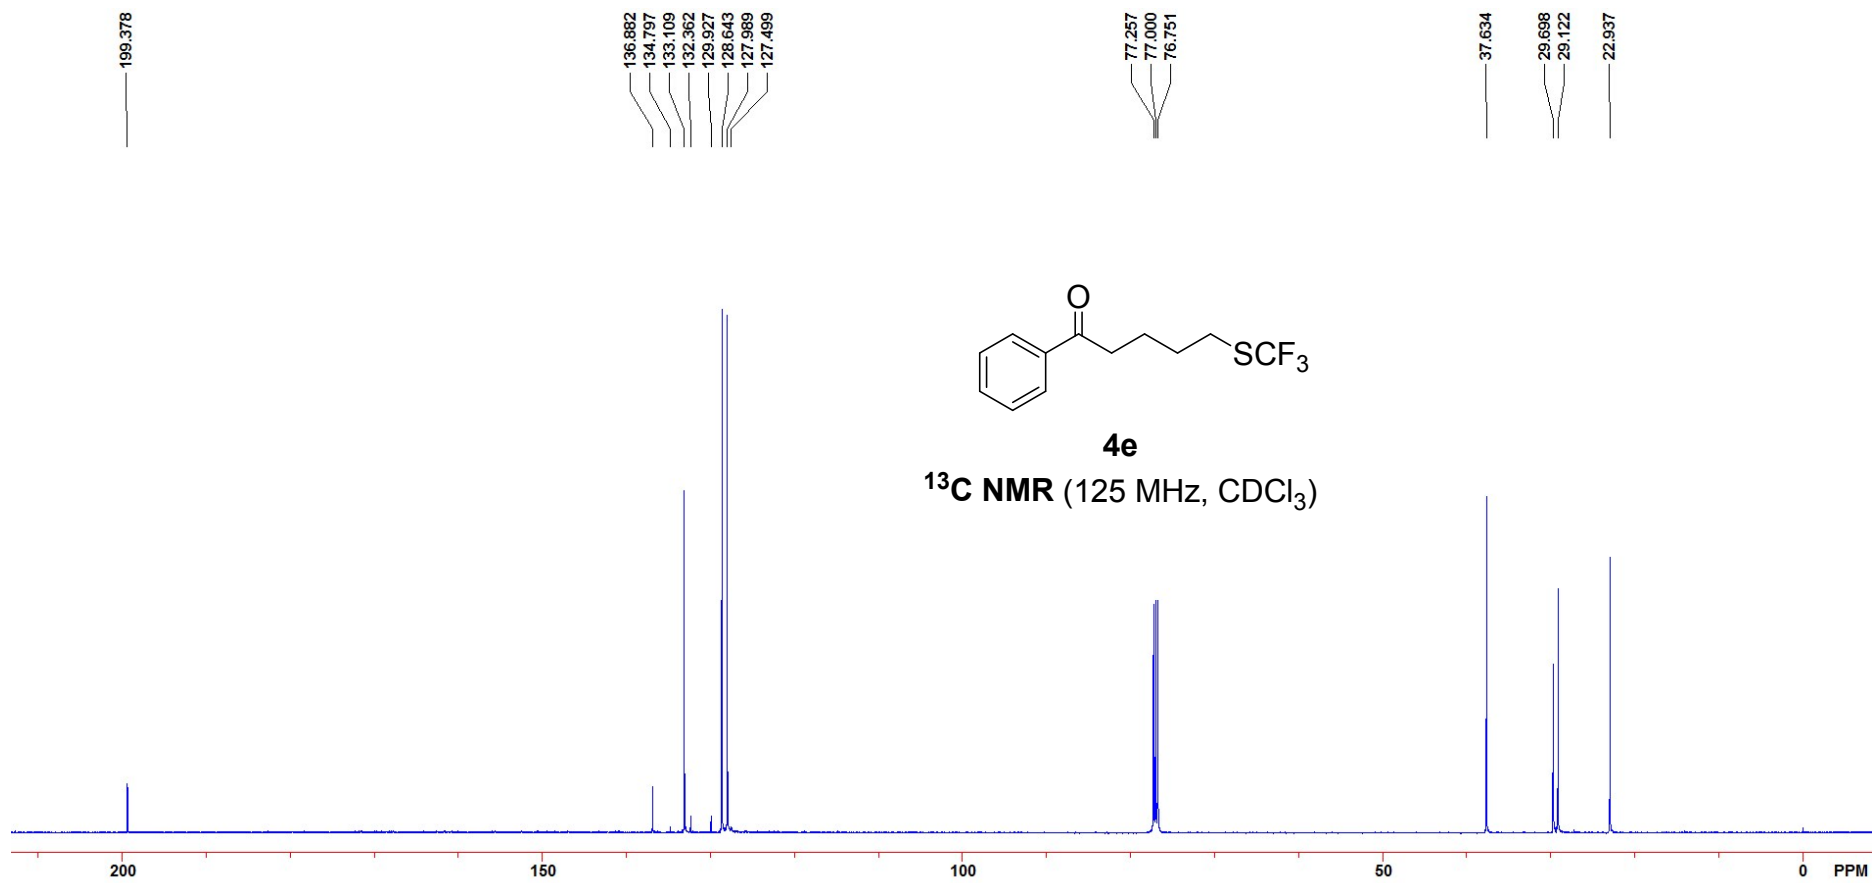

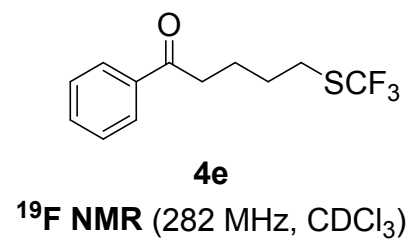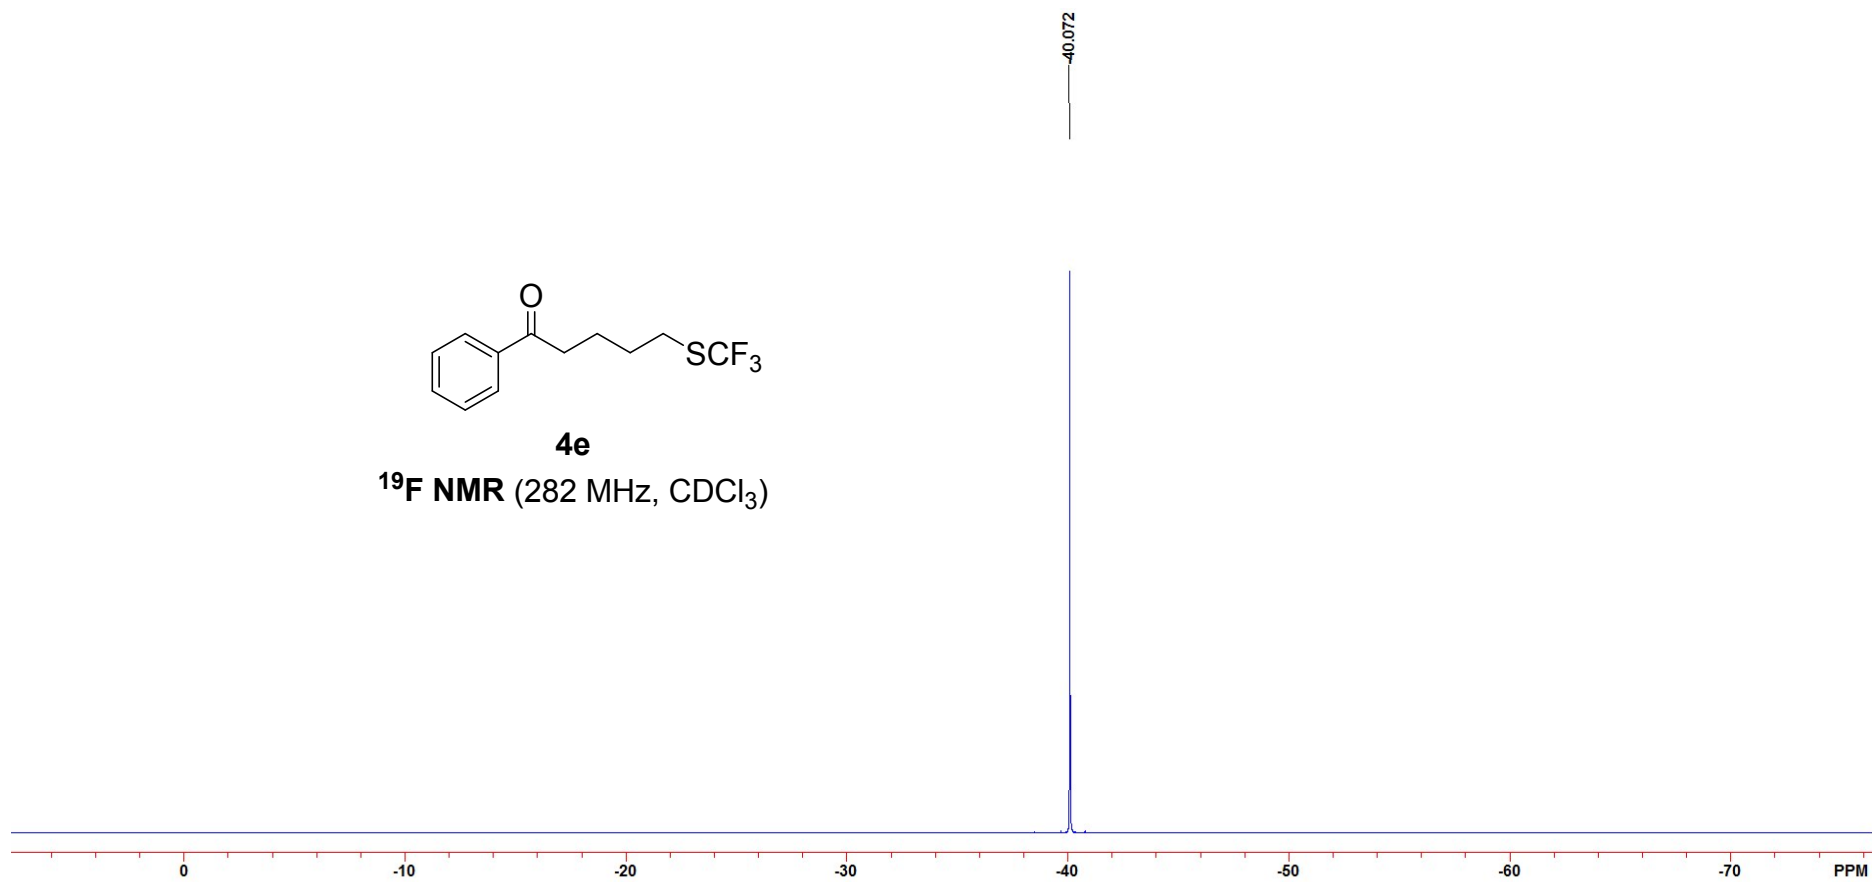

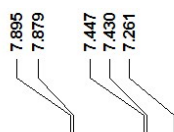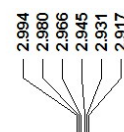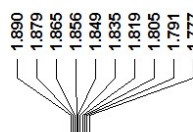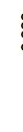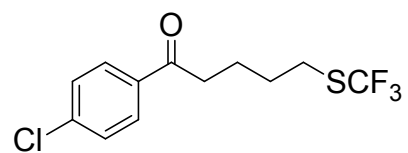

4f

<sup>1</sup>H NMR (500 MHz, CDCl<sub>3</sub>)

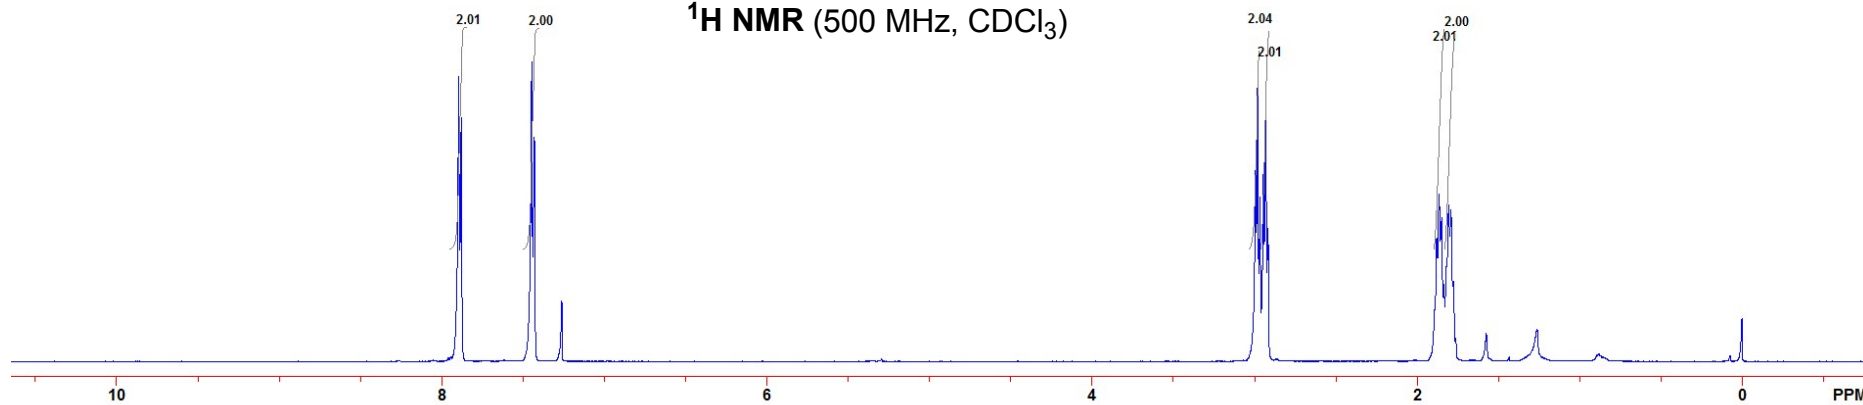

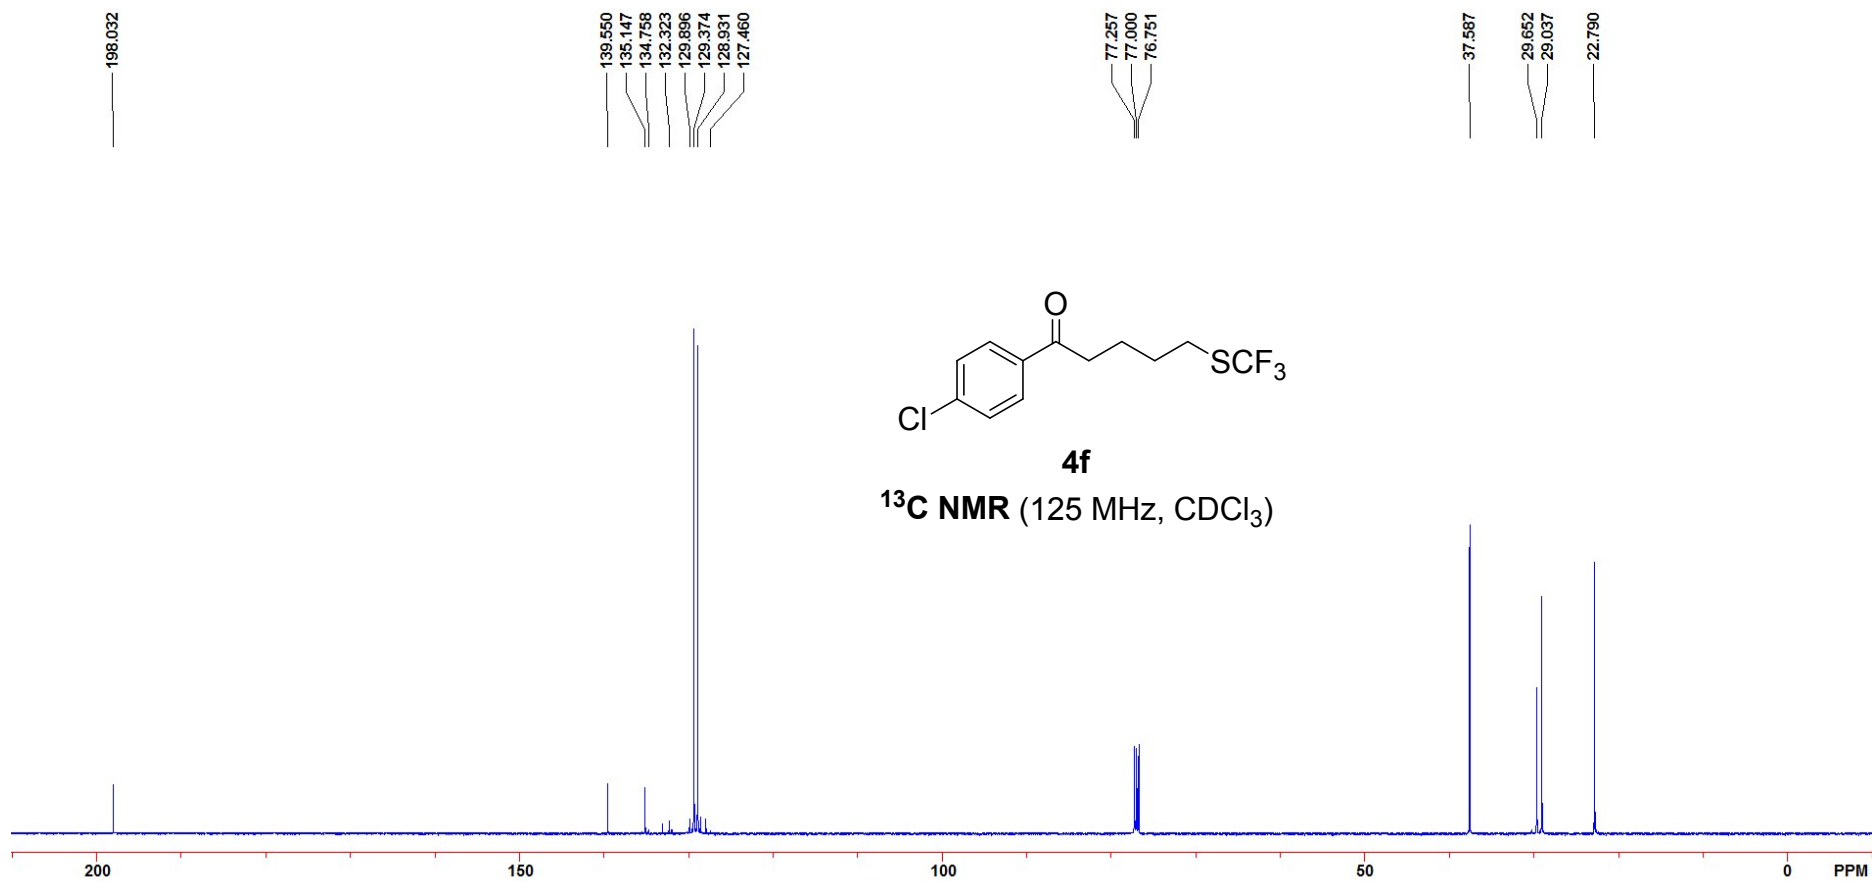

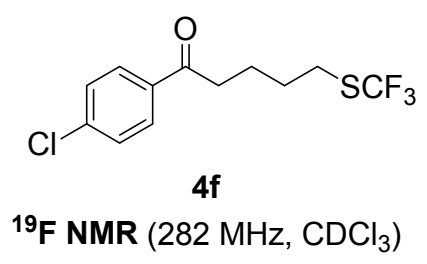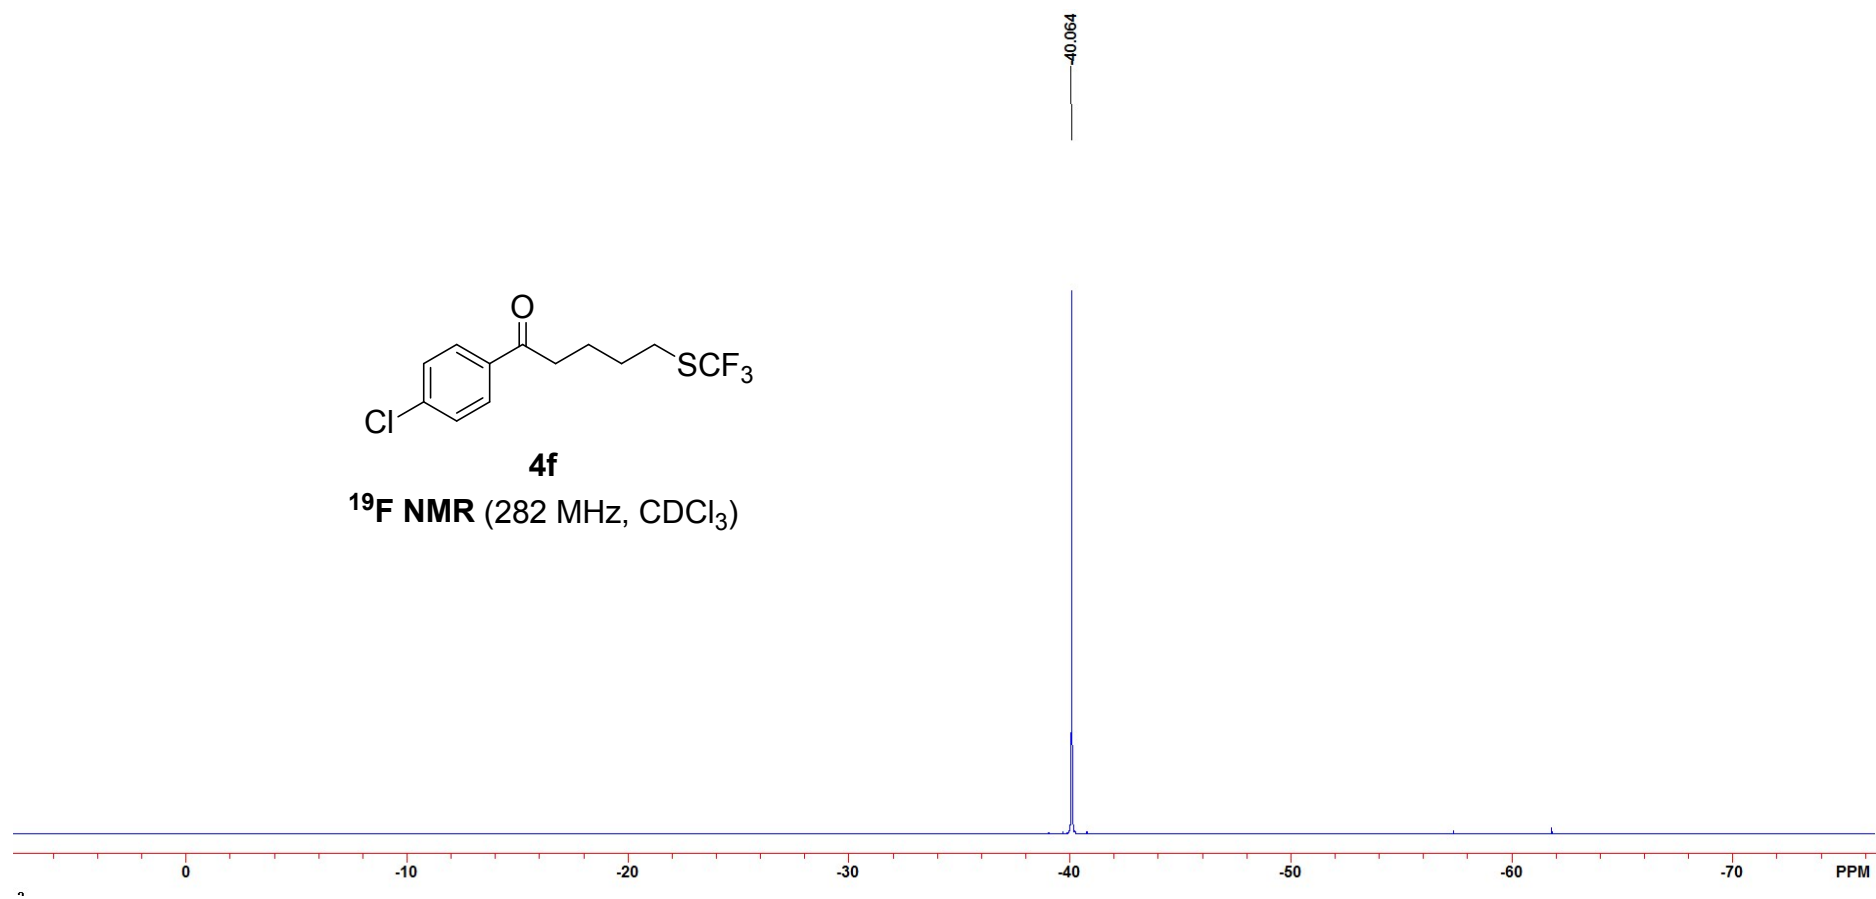



8.012  
7.994

7.301  
7.284  
7.261

3.015  
3.001  
2.987  
2.950  
2.936  
2.922

1.891  
1.877  
1.874  
1.868  
1.860  
1.846  
1.827  
1.812  
1.798  
1.782

-0.000

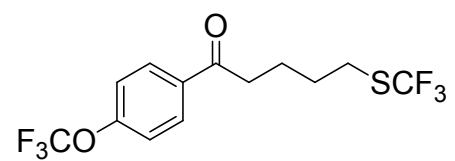

**4g**

**<sup>1</sup>H NMR (500 MHz, CDCl<sub>3</sub>)**

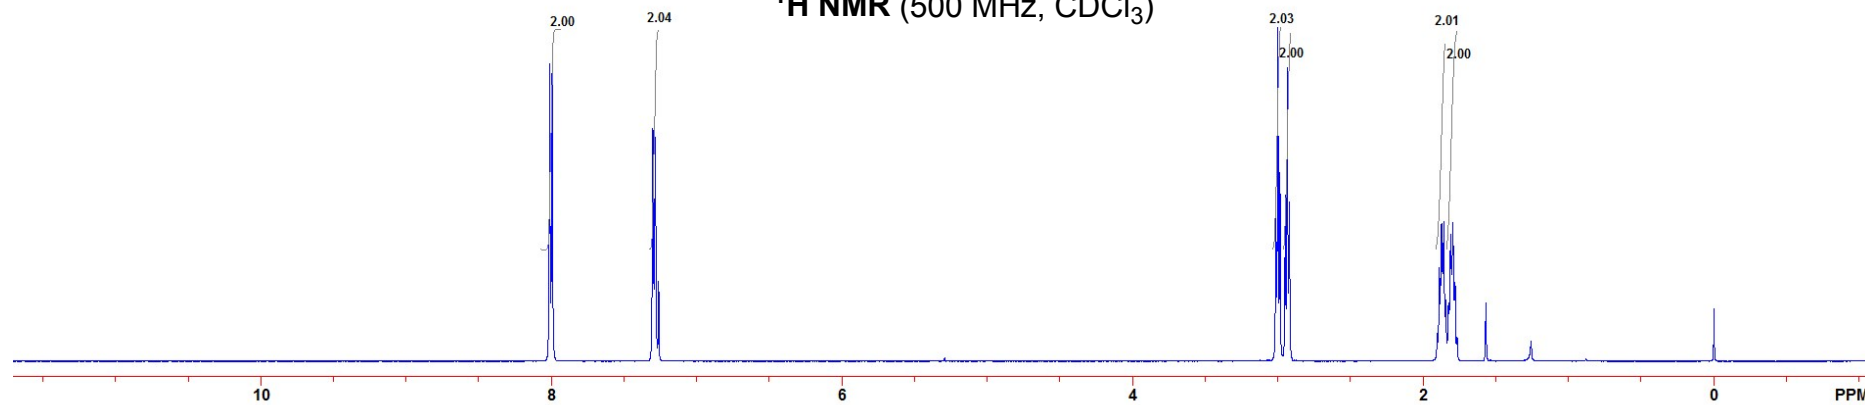

197.744

152.691

135.065

132.338

129.997

121.338

120.451

119.284

77.249

77.000

76.743

37.680

29.667

29.060

22.790

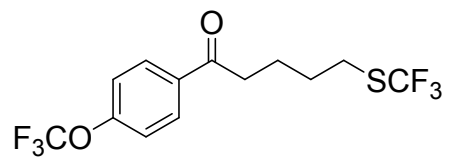

**4g**

**<sup>13</sup>C NMR (125 MHz, CDCl<sub>3</sub>)**

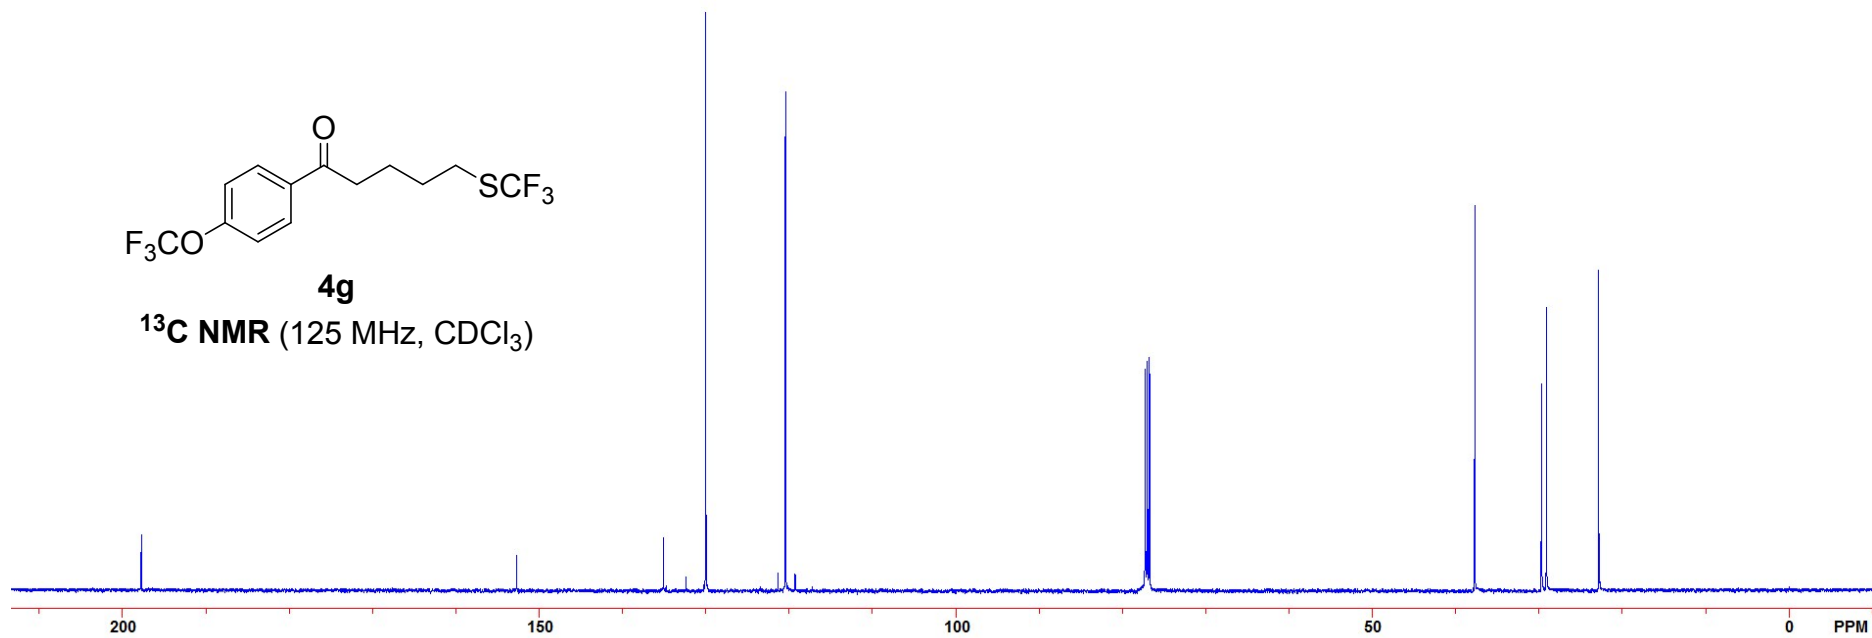

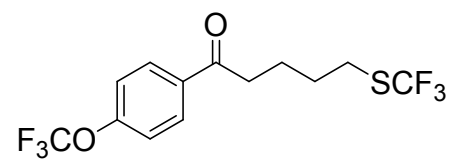

**4g**

$^{19}\text{F}$  NMR (282 MHz,  $\text{CDCl}_3$ )

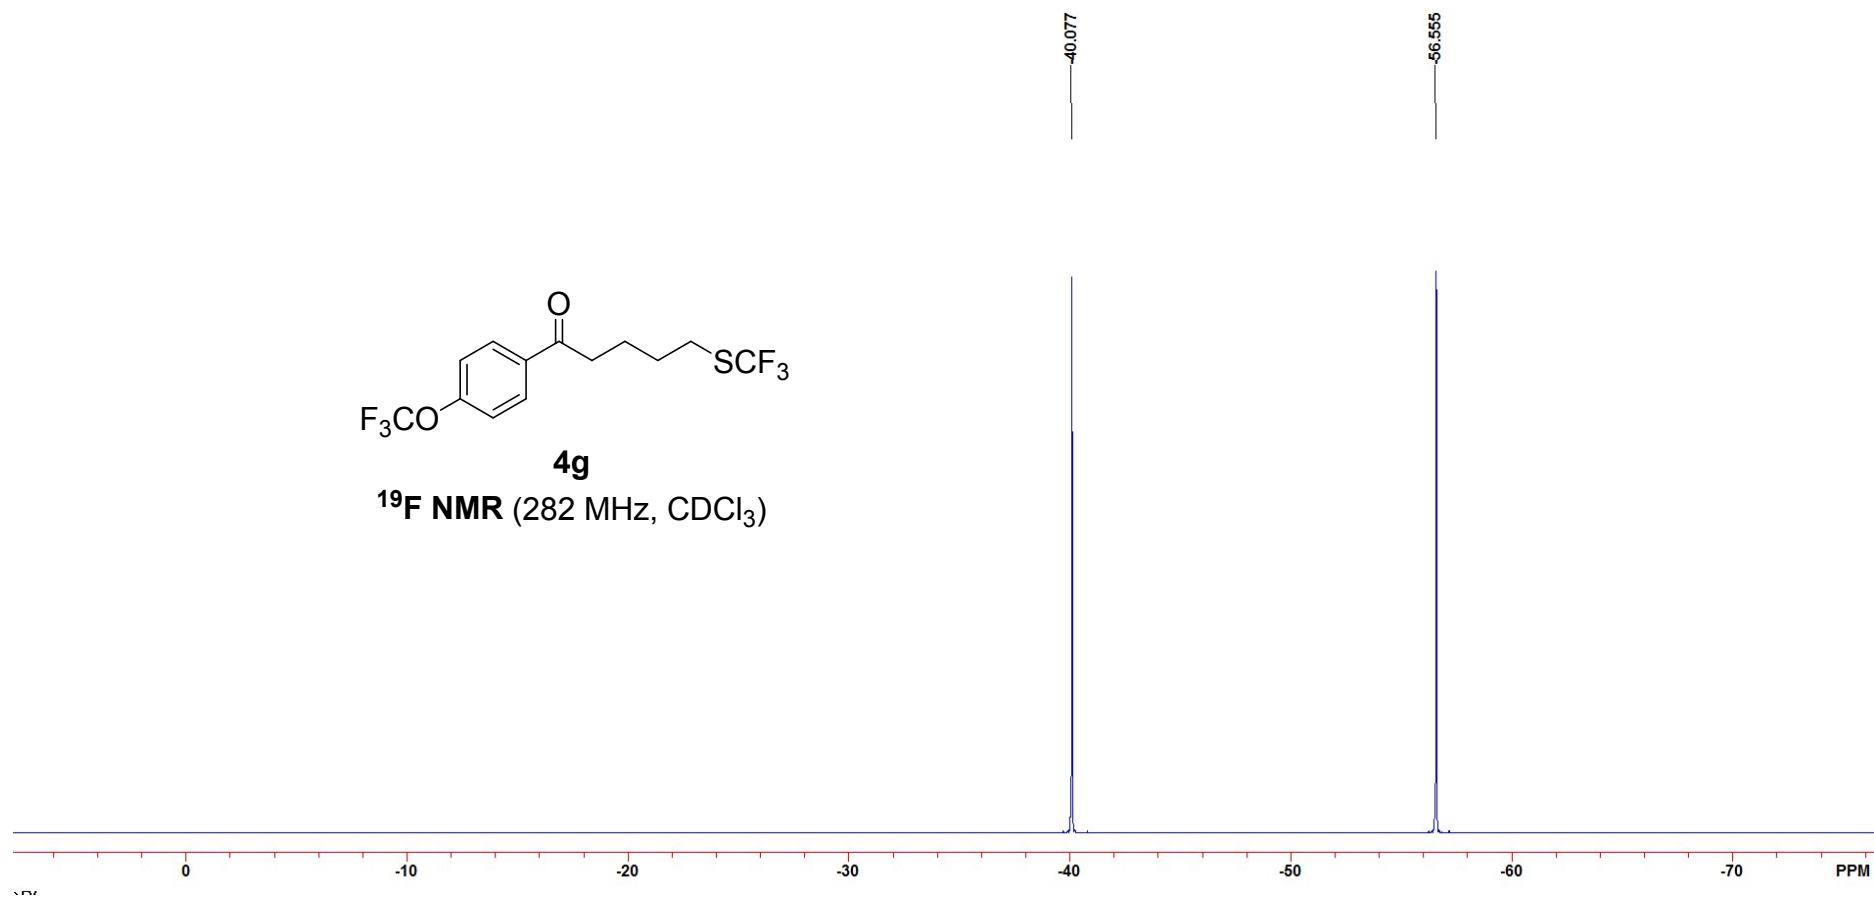

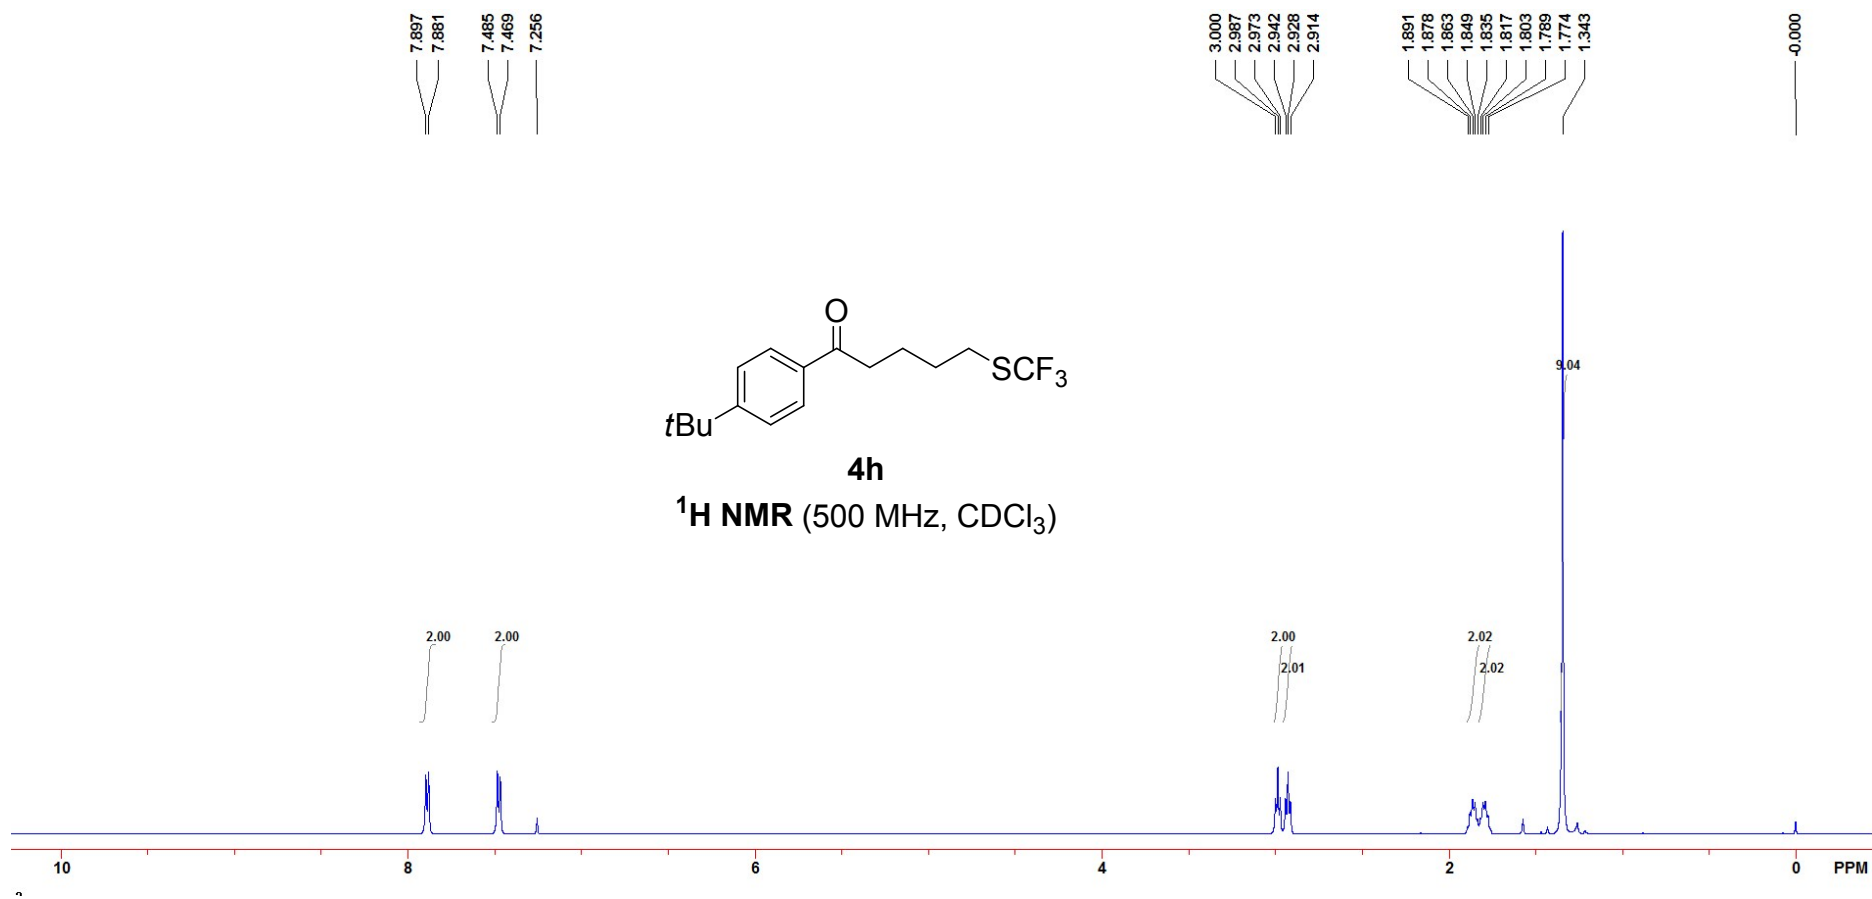

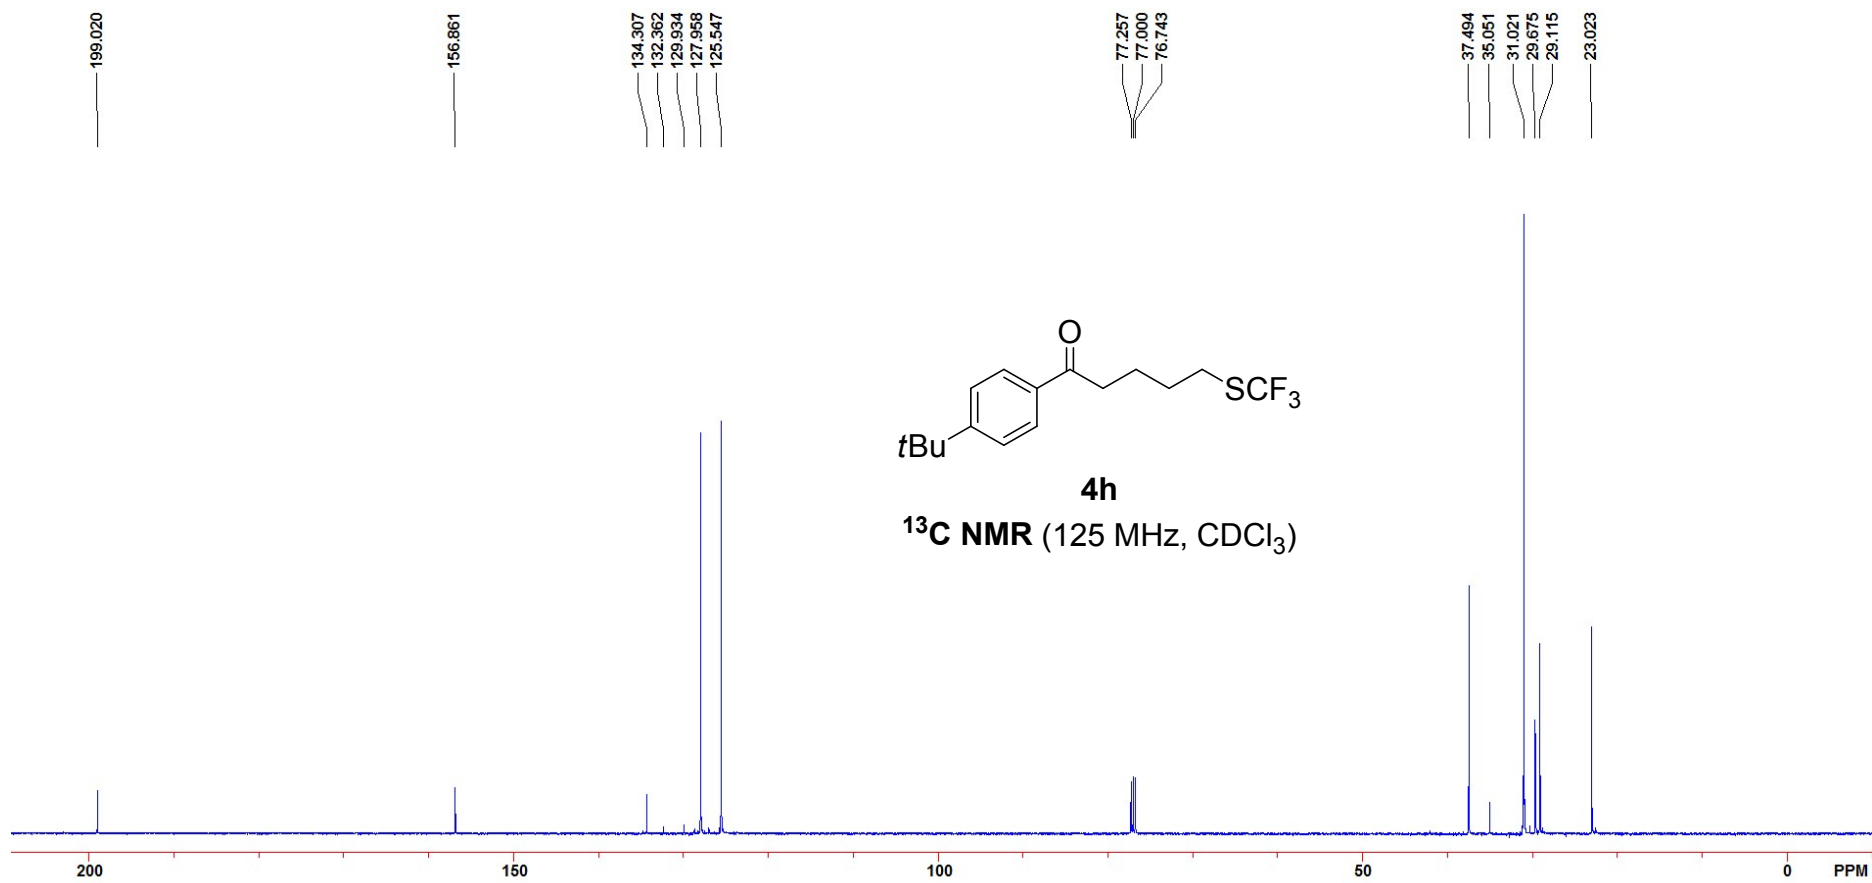

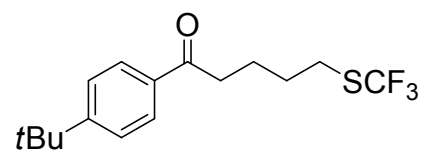

**4h**

**<sup>19</sup>F NMR (282 MHz, CDCl<sub>3</sub>)**

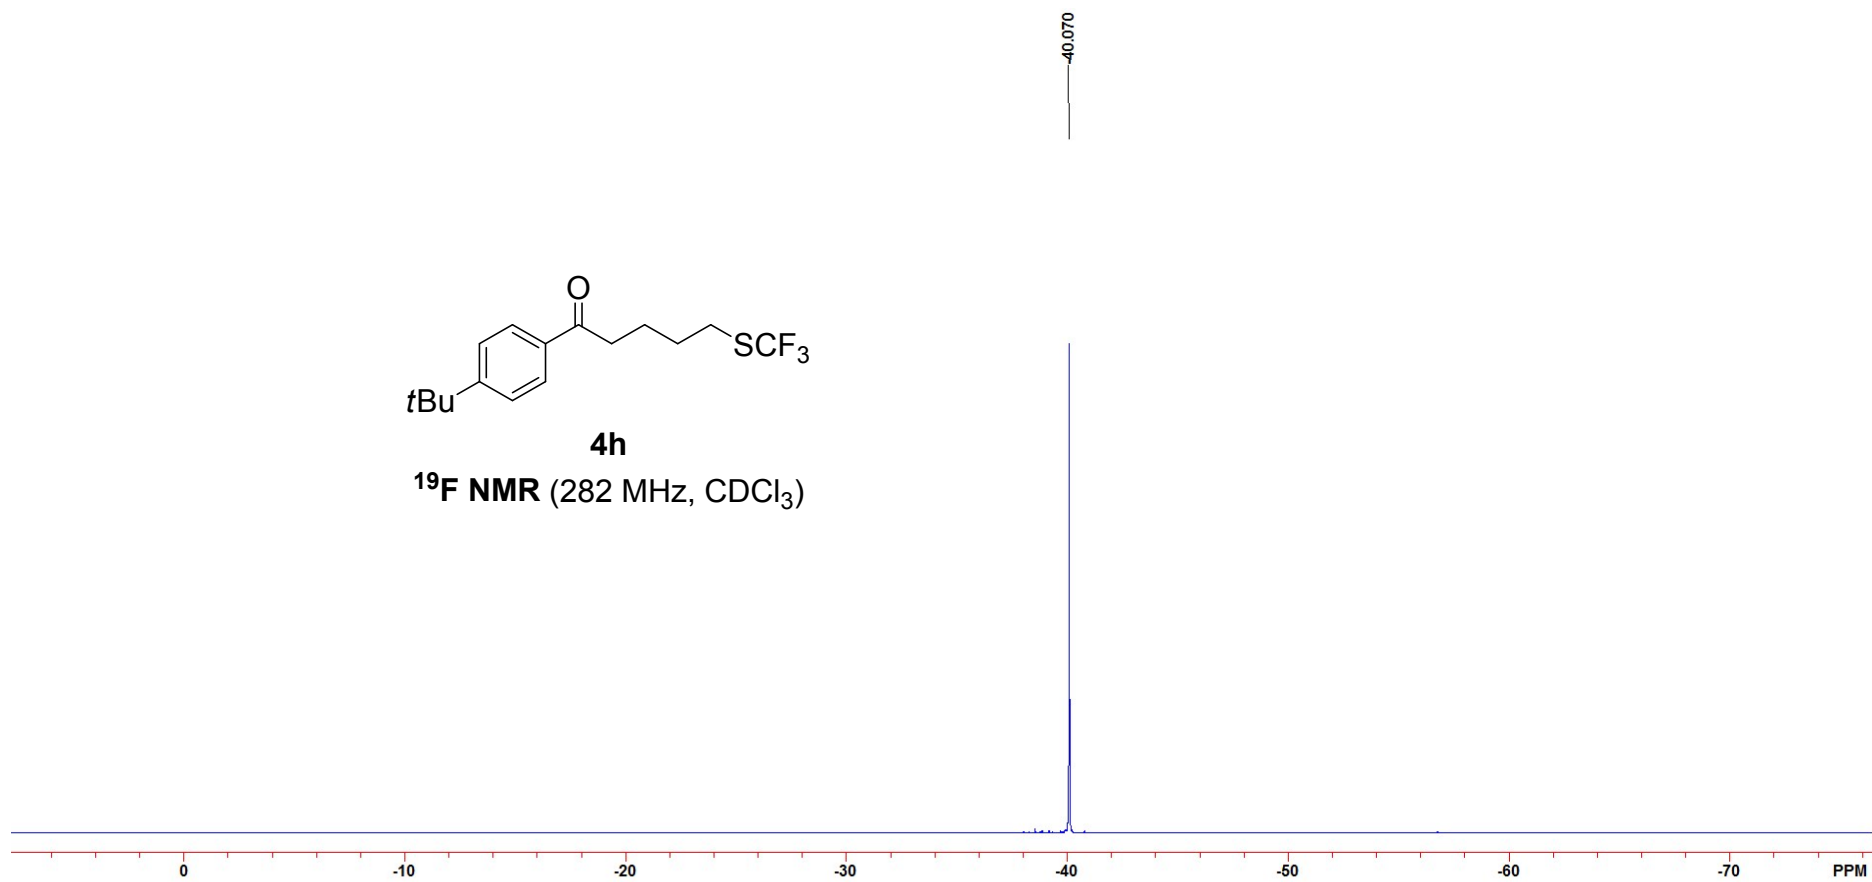

7.914  
7.824  
7.809  
7.542  
7.527  
7.425  
7.409  
7.393  
7.261

3.000  
2.987  
2.973  
2.947  
2.932  
2.918  
1.894  
1.880  
1.863  
1.865  
1.851  
1.838  
1.820  
1.805  
1.790  
1.776  
1.762  
1.569

-0.000

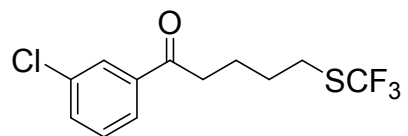

**4i**

**<sup>1</sup>H NMR (500 MHz, CDCl<sub>3</sub>)**

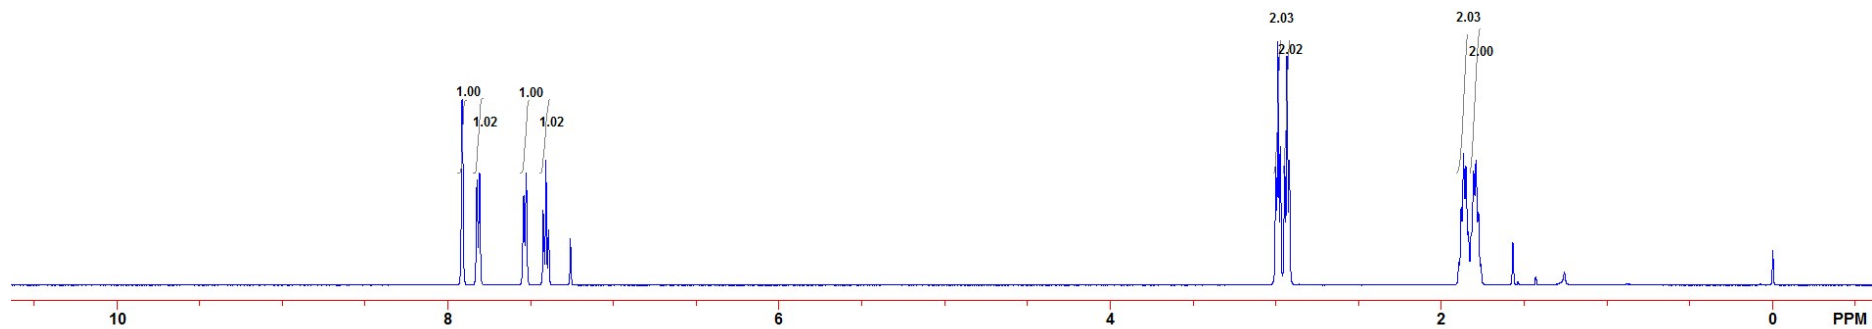

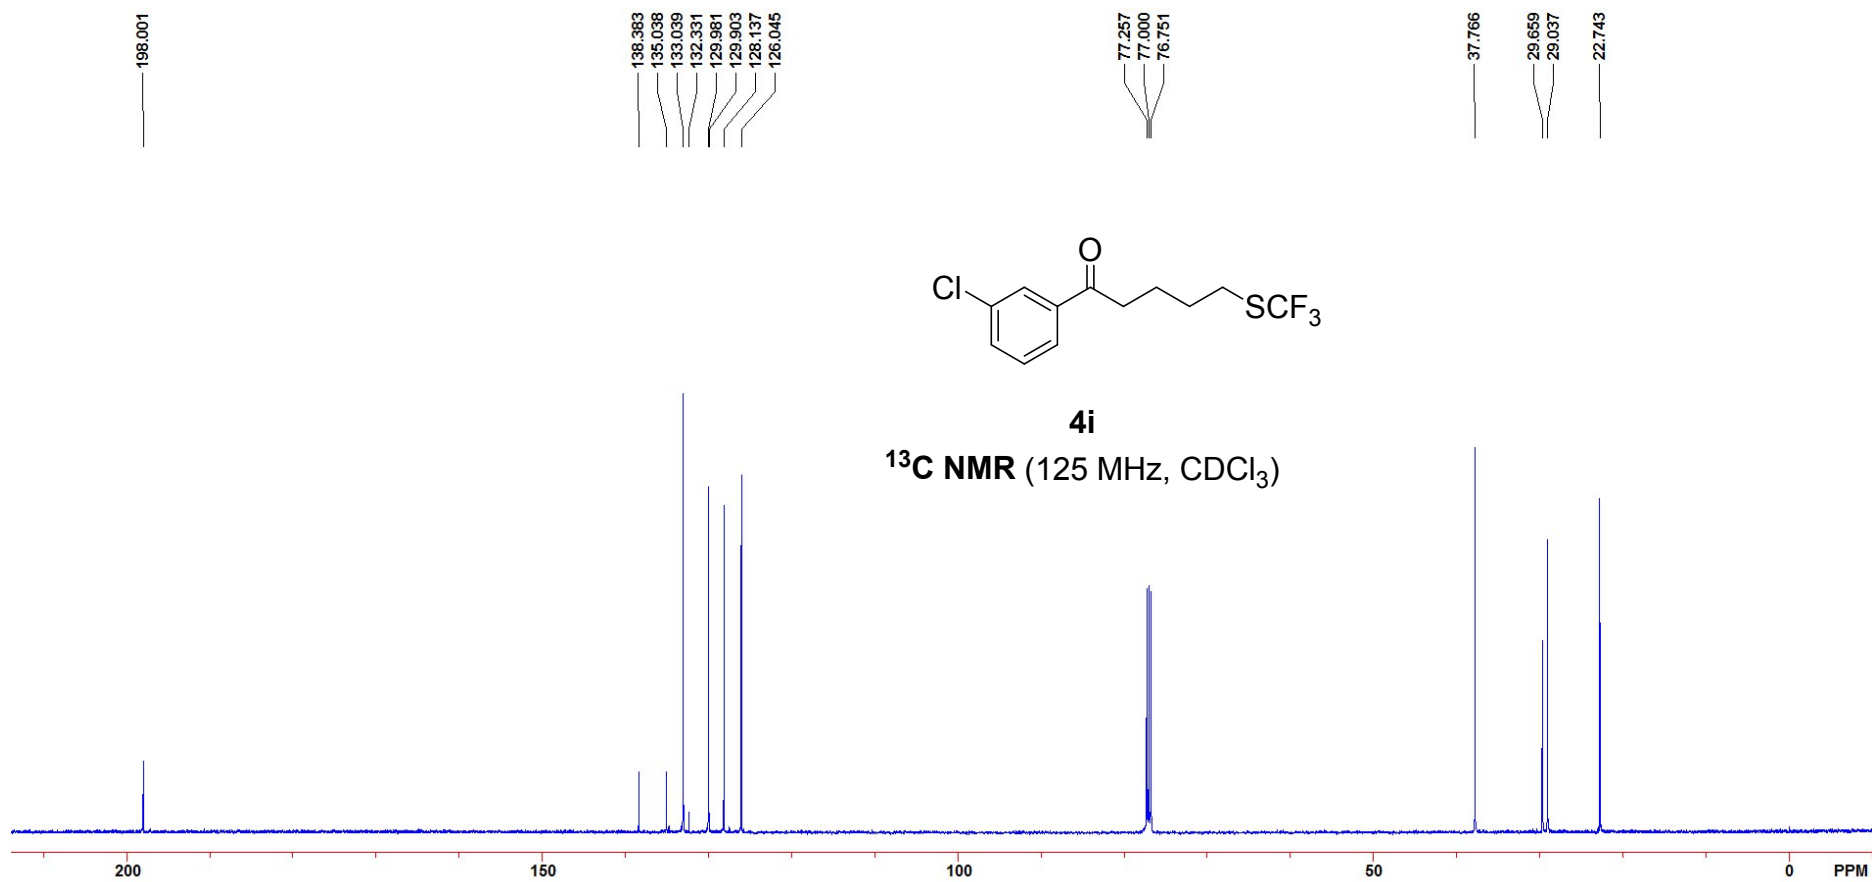



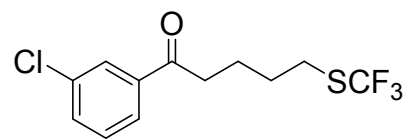

**4i**

**<sup>19</sup>F NMR (282 MHz, CDCl<sub>3</sub>)**

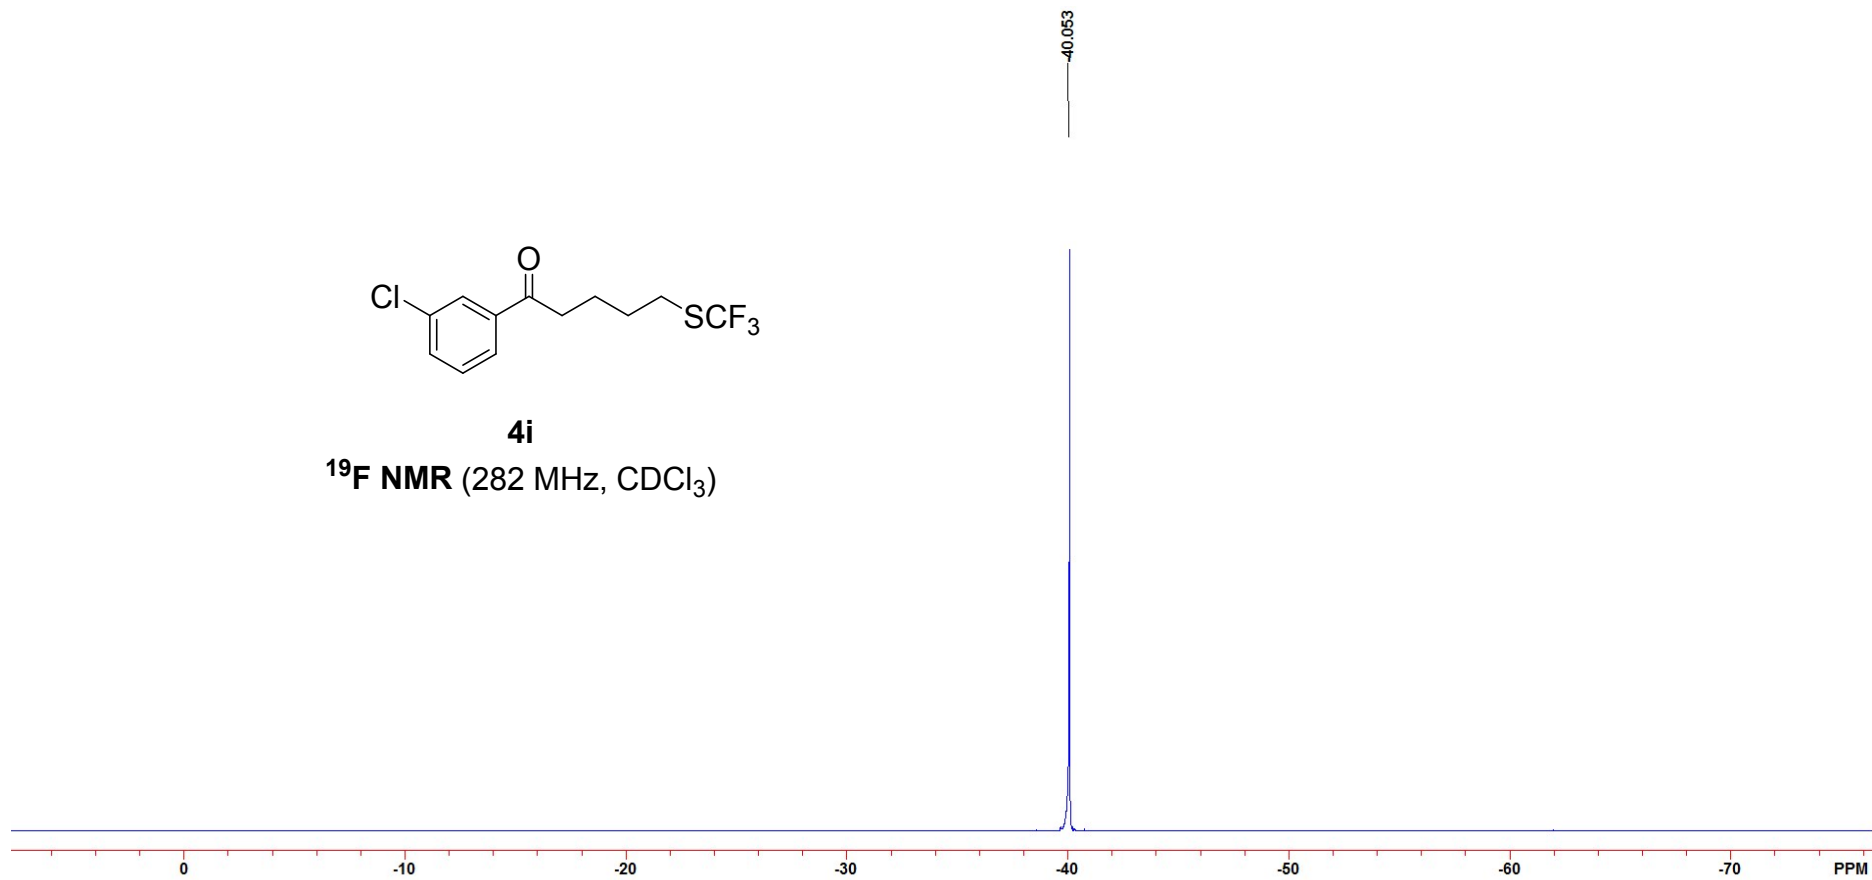

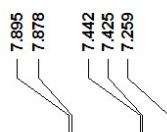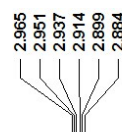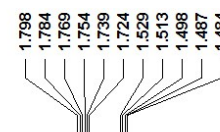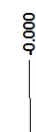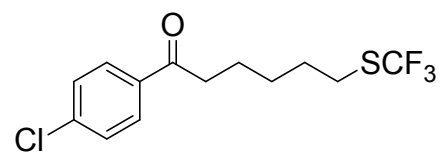

**4j**

**<sup>1</sup>H NMR (500 MHz, CDCl<sub>3</sub>)**

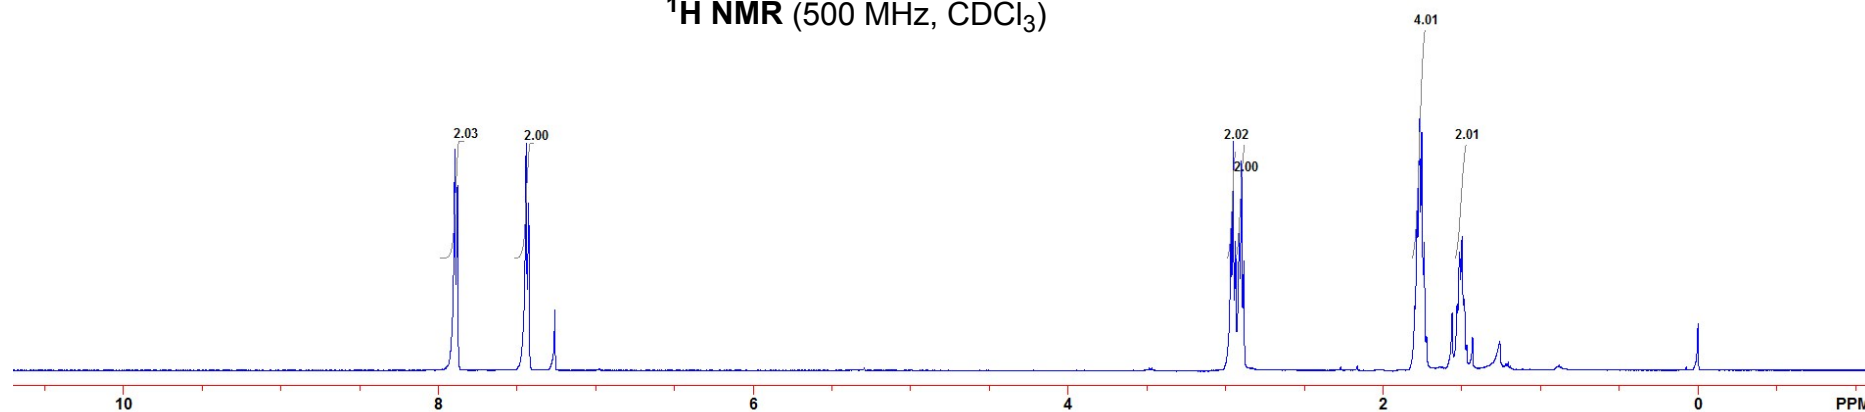

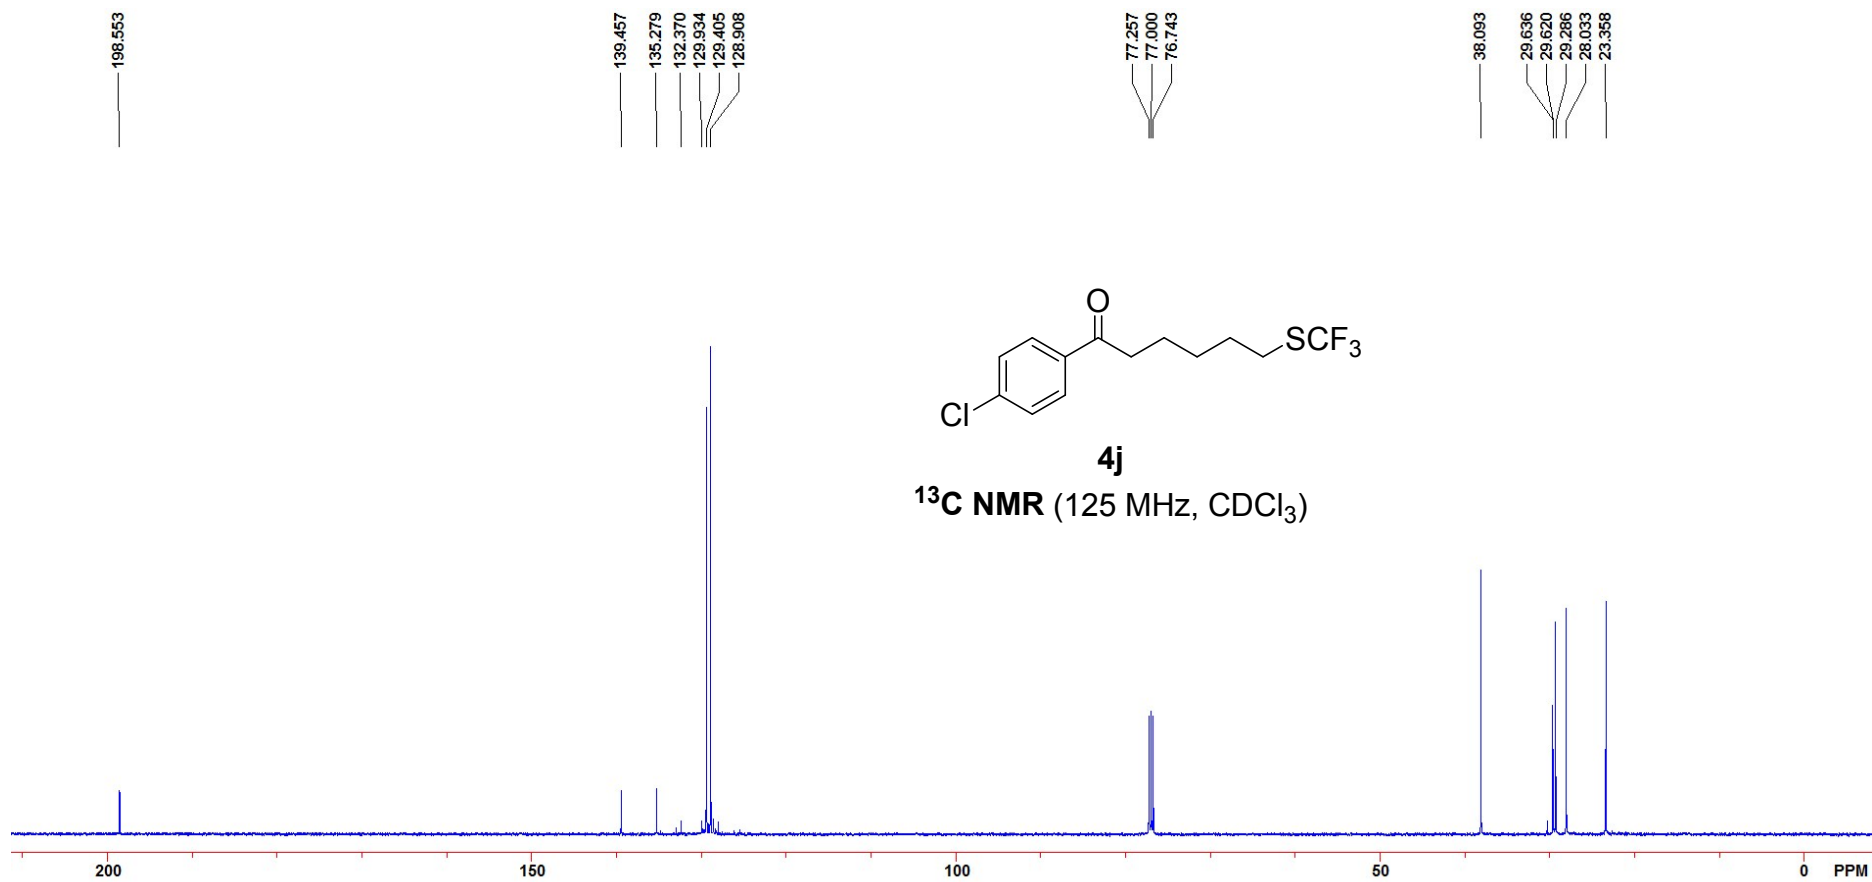

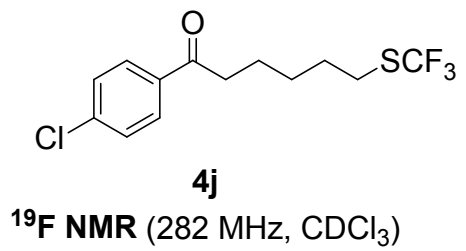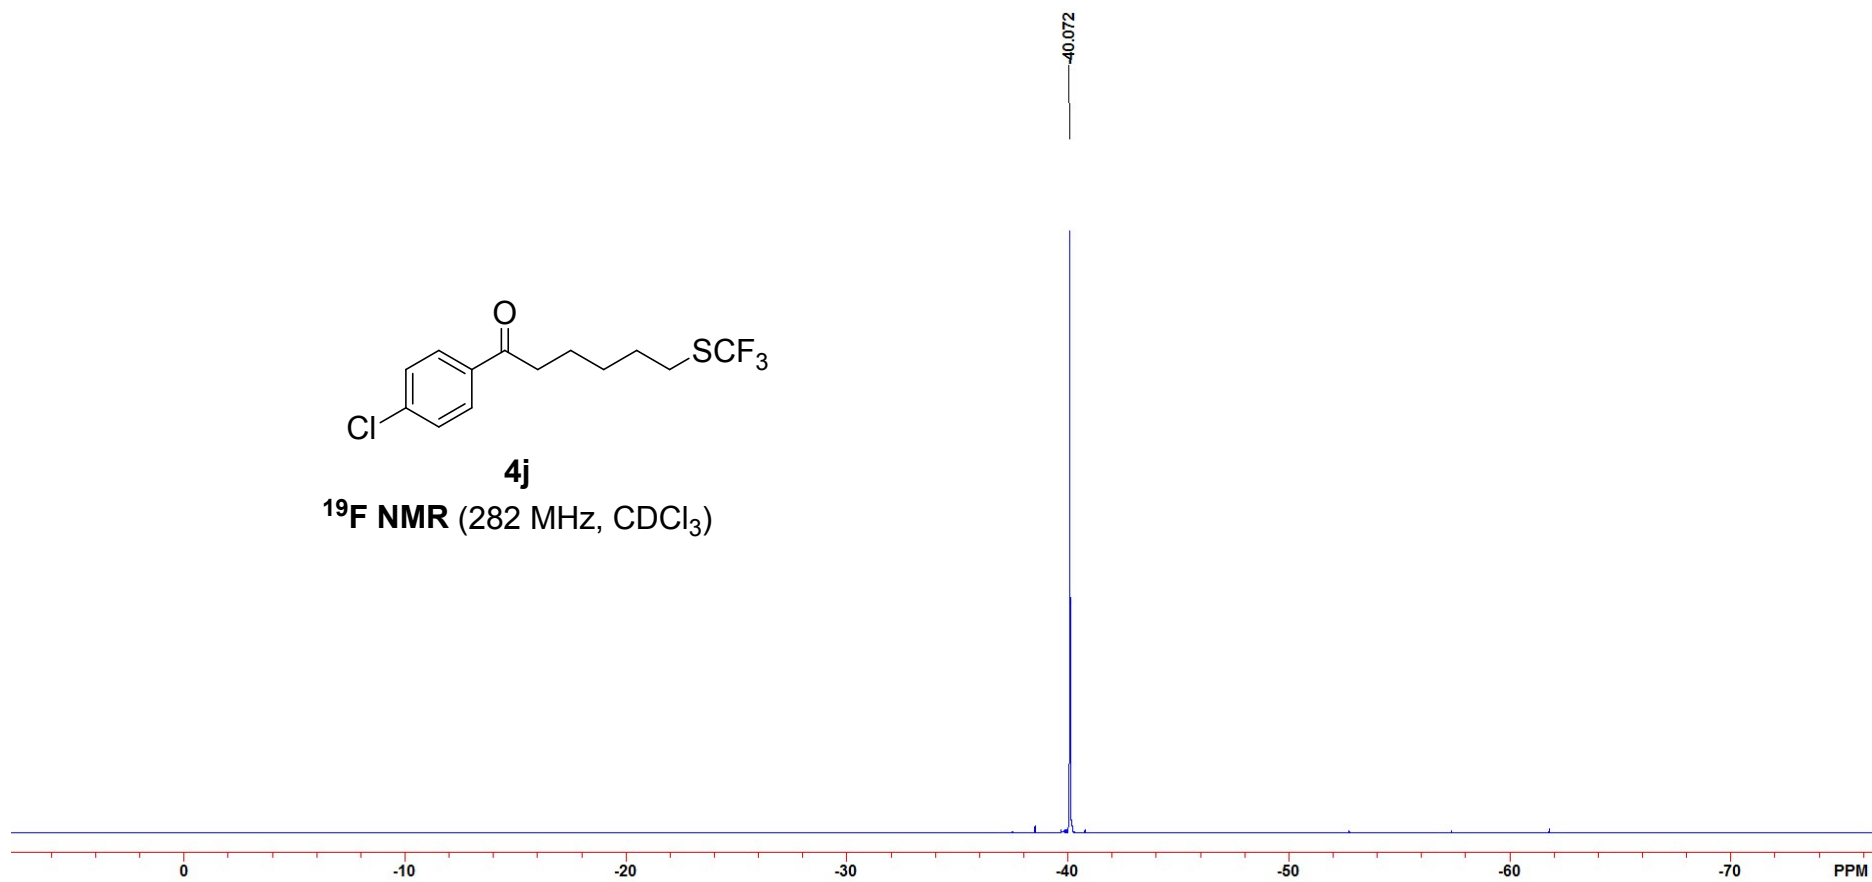

7.314  
7.312  
7.298  
7.265  
7.262  
7.253  
7.248

3.068  
3.054  
3.040  
2.575  
2.562  
2.549  
2.019  
2.005  
1.991  
1.978  
1.520  
1.431

-0.000

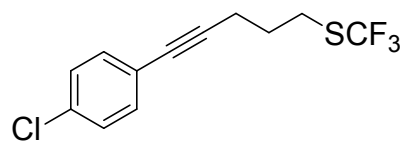

**5**

**<sup>1</sup>H NMR (500 MHz, CDCl<sub>3</sub>)**

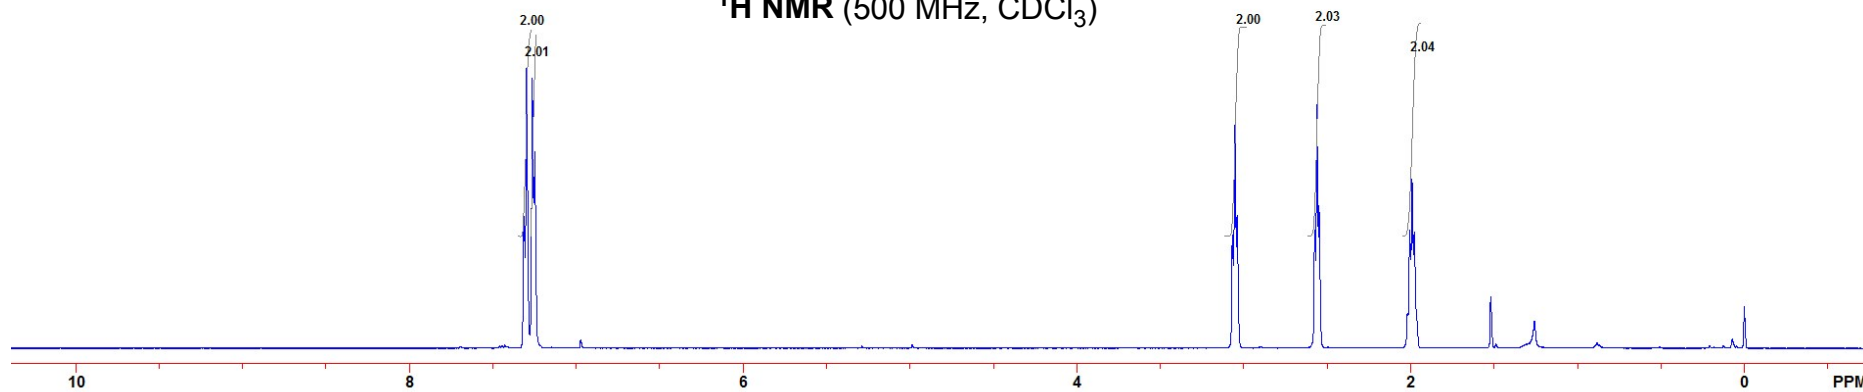

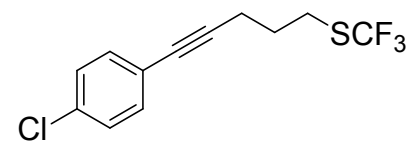

**5**

**<sup>13</sup>C NMR (125 MHz, CDCl<sub>3</sub>)**

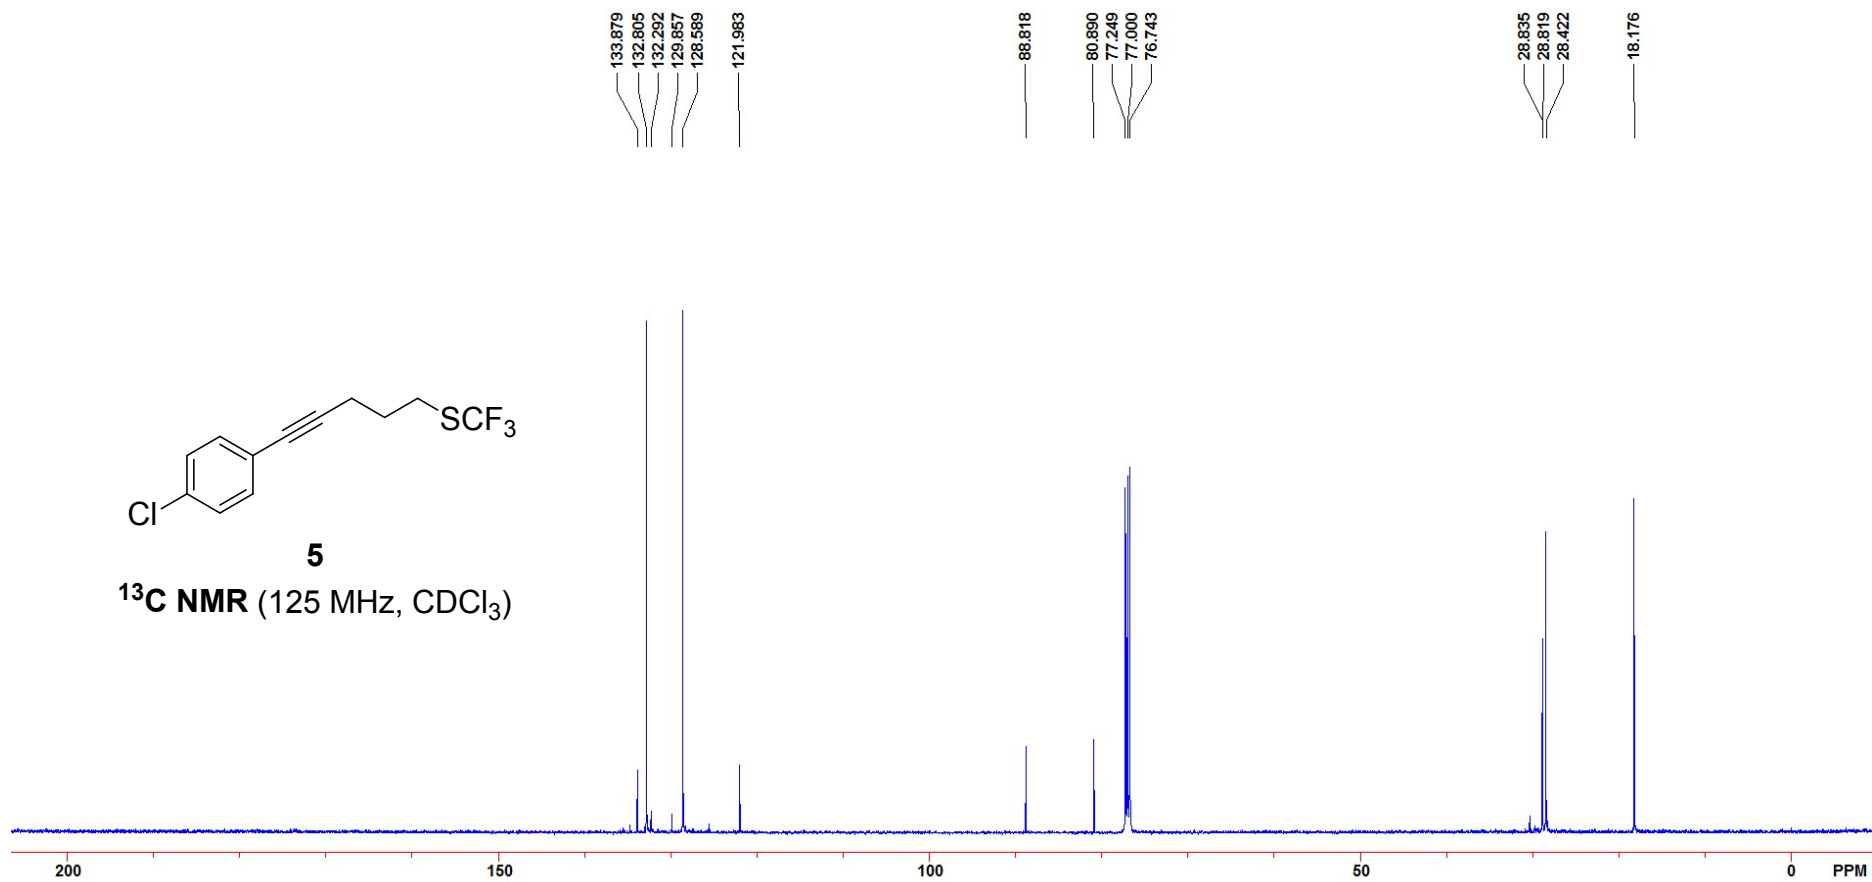

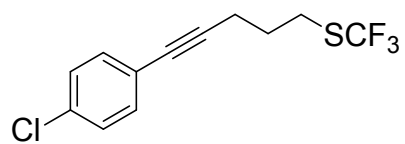

**5**

**<sup>19</sup>F NMR (282 MHz, CDCl<sub>3</sub>)**

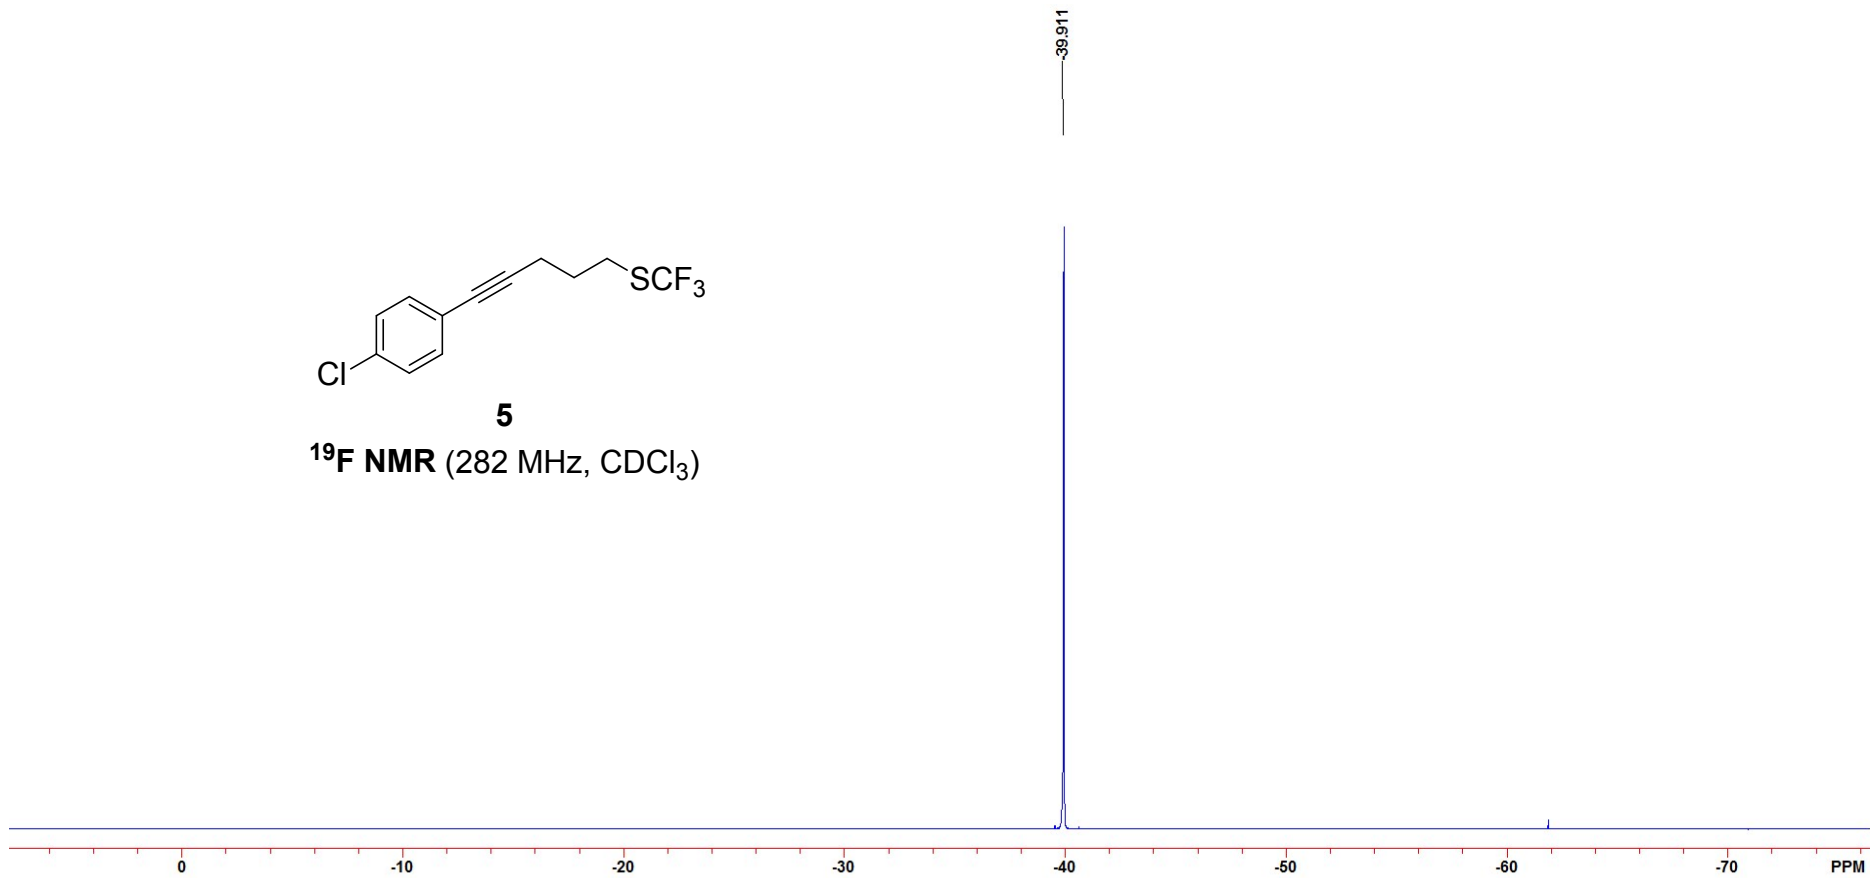

7.541  
7.525  
7.335  
7.318  
7.254

2.942  
2.928  
2.915  
2.900  
2.893  
2.879  
2.866  
2.853  
2.839  
2.367  
2.014  
1.992  
1.977  
1.957  
1.939  
1.931  
1.918  
1.912  
1.896  
1.876  
1.854  
1.830  
1.811  
1.795  
1.775  
1.761  
1.751  
0.215  
-0.000

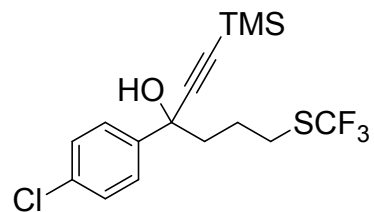

<sup>1</sup>H NMR (500 MHz, CDCl<sub>3</sub>)

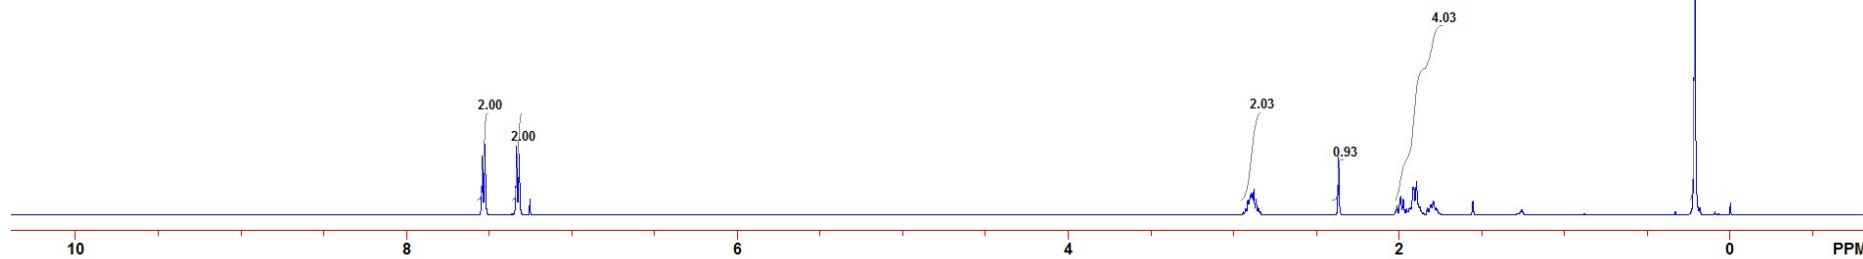



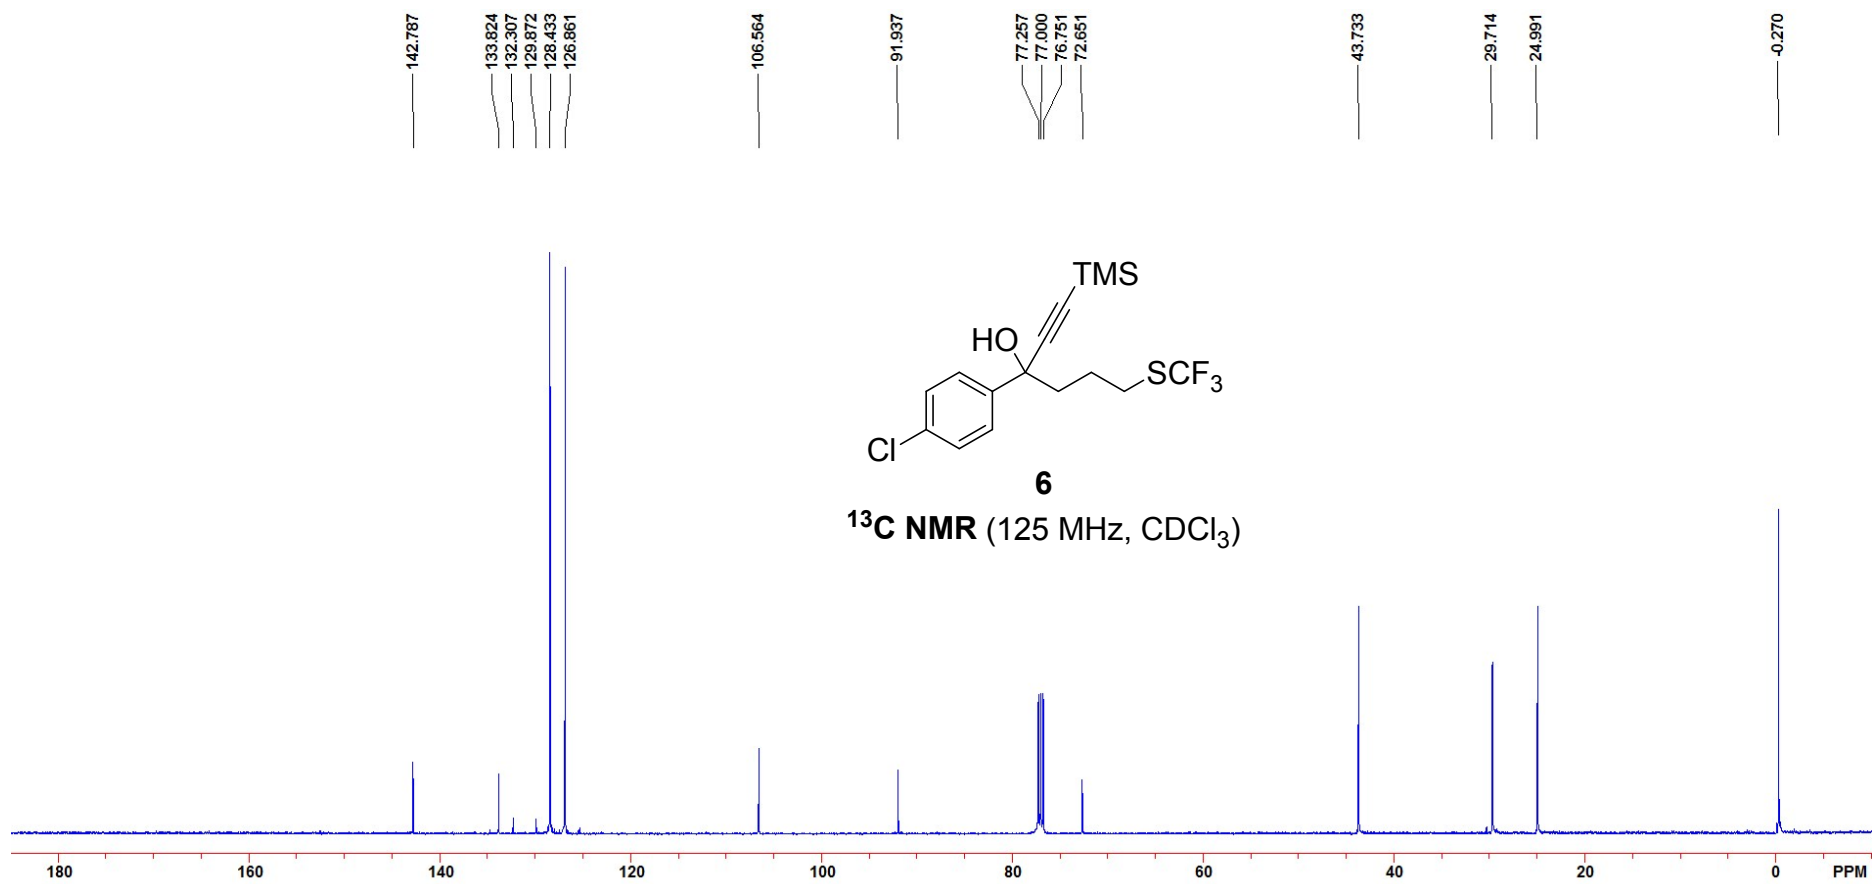

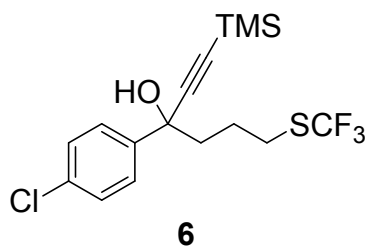

**<sup>19</sup>F NMR (282 MHz, CDCl<sub>3</sub>)**

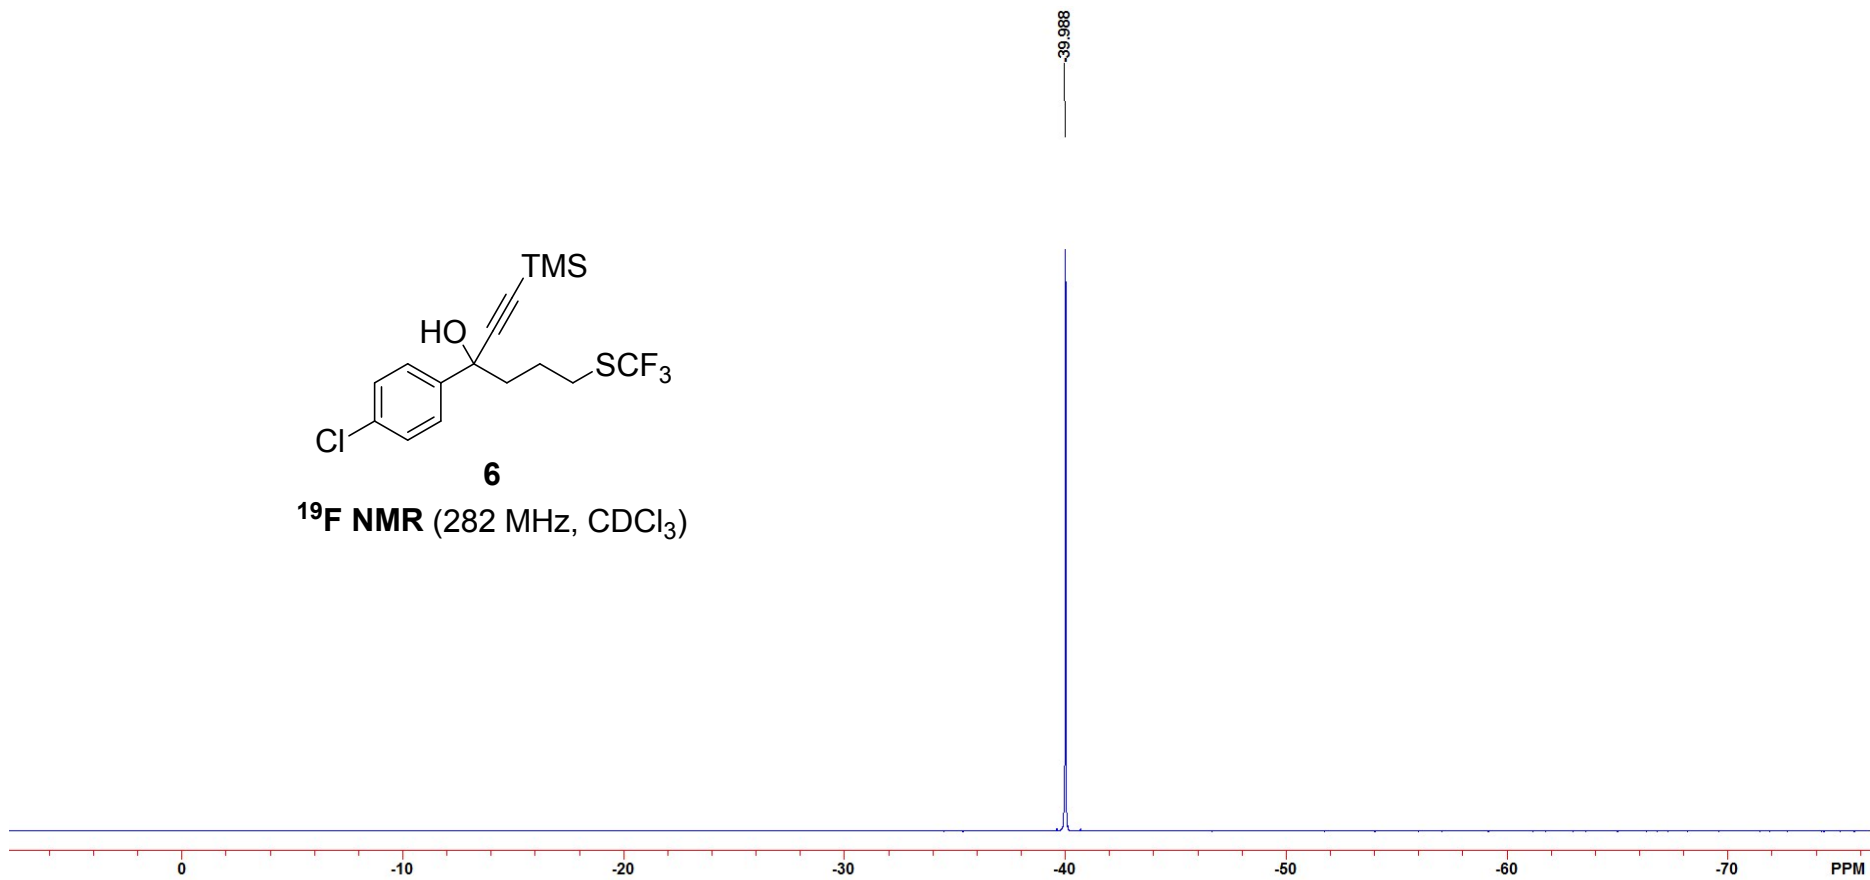

7.322  
7.306  
7.260  
7.243

4.663

2.889  
2.879  
2.874  
1.868  
1.848  
1.829  
1.822  
2.024  
1.815  
1.806  
1.801  
1.789  
1.772  
1.751  
1.742  
1.730  
1.715  
1.700  
1.675  
0.000

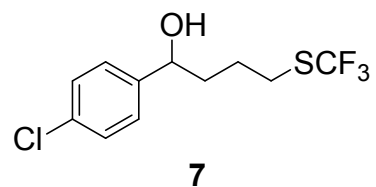

**<sup>1</sup>H NMR (500 MHz, CDCl<sub>3</sub>)**

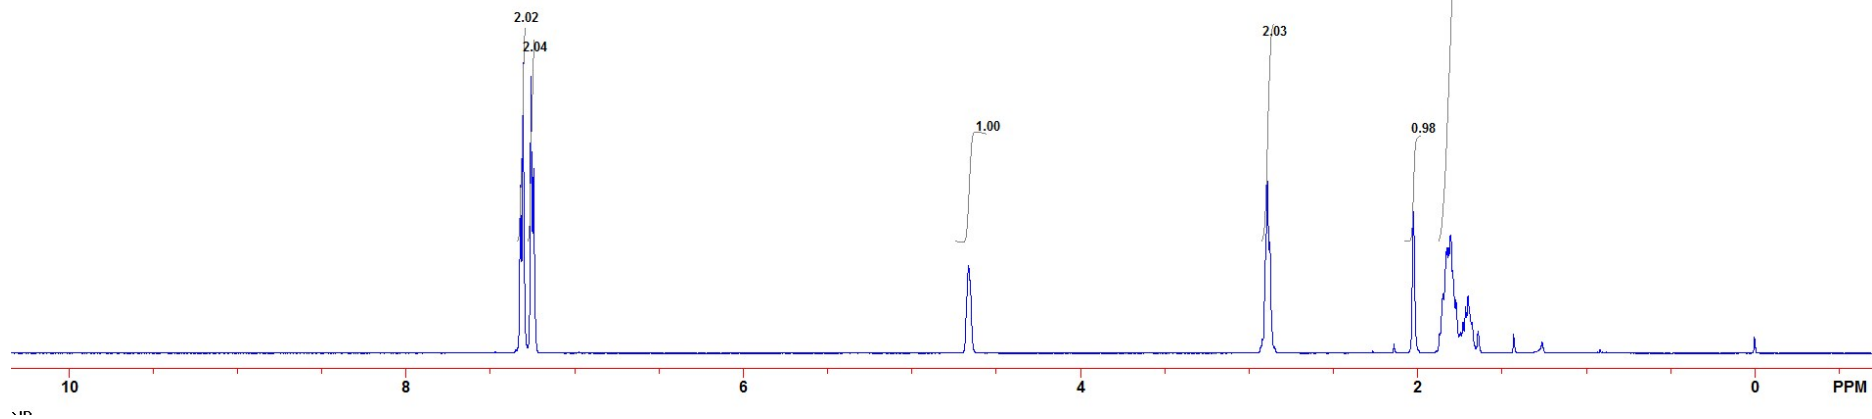

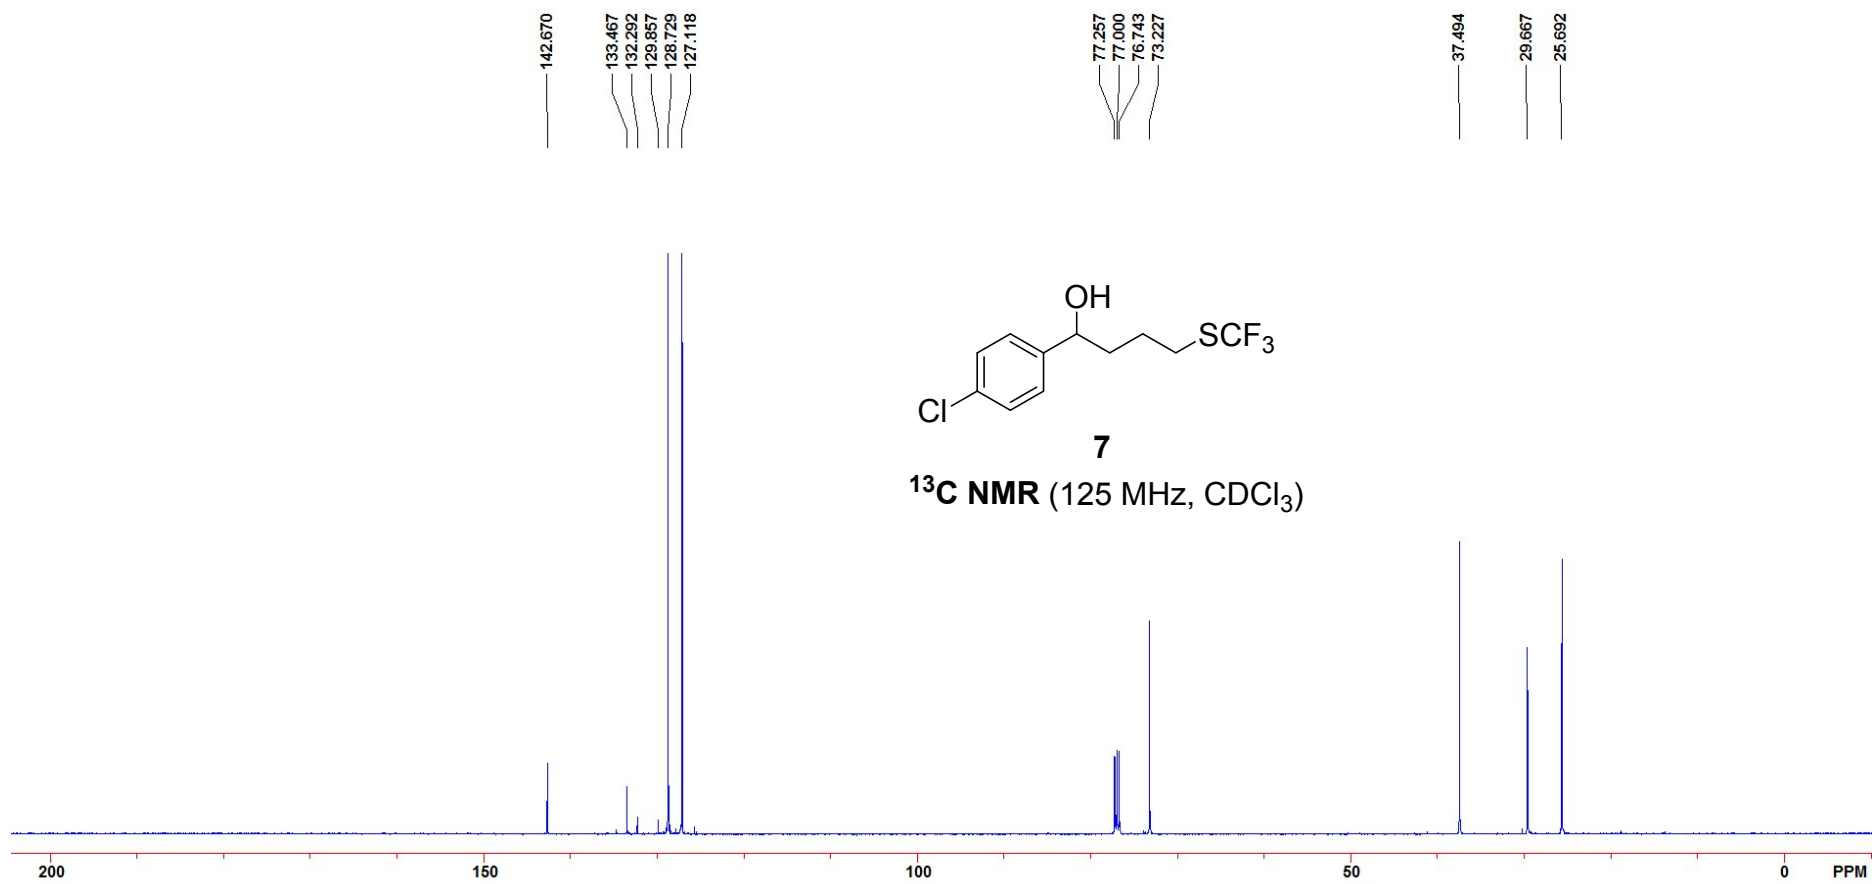

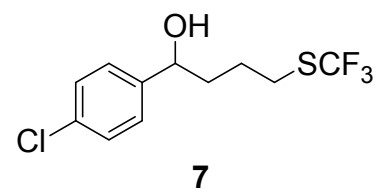

**<sup>19</sup>F NMR (282 MHz, CDCl<sub>3</sub>)**

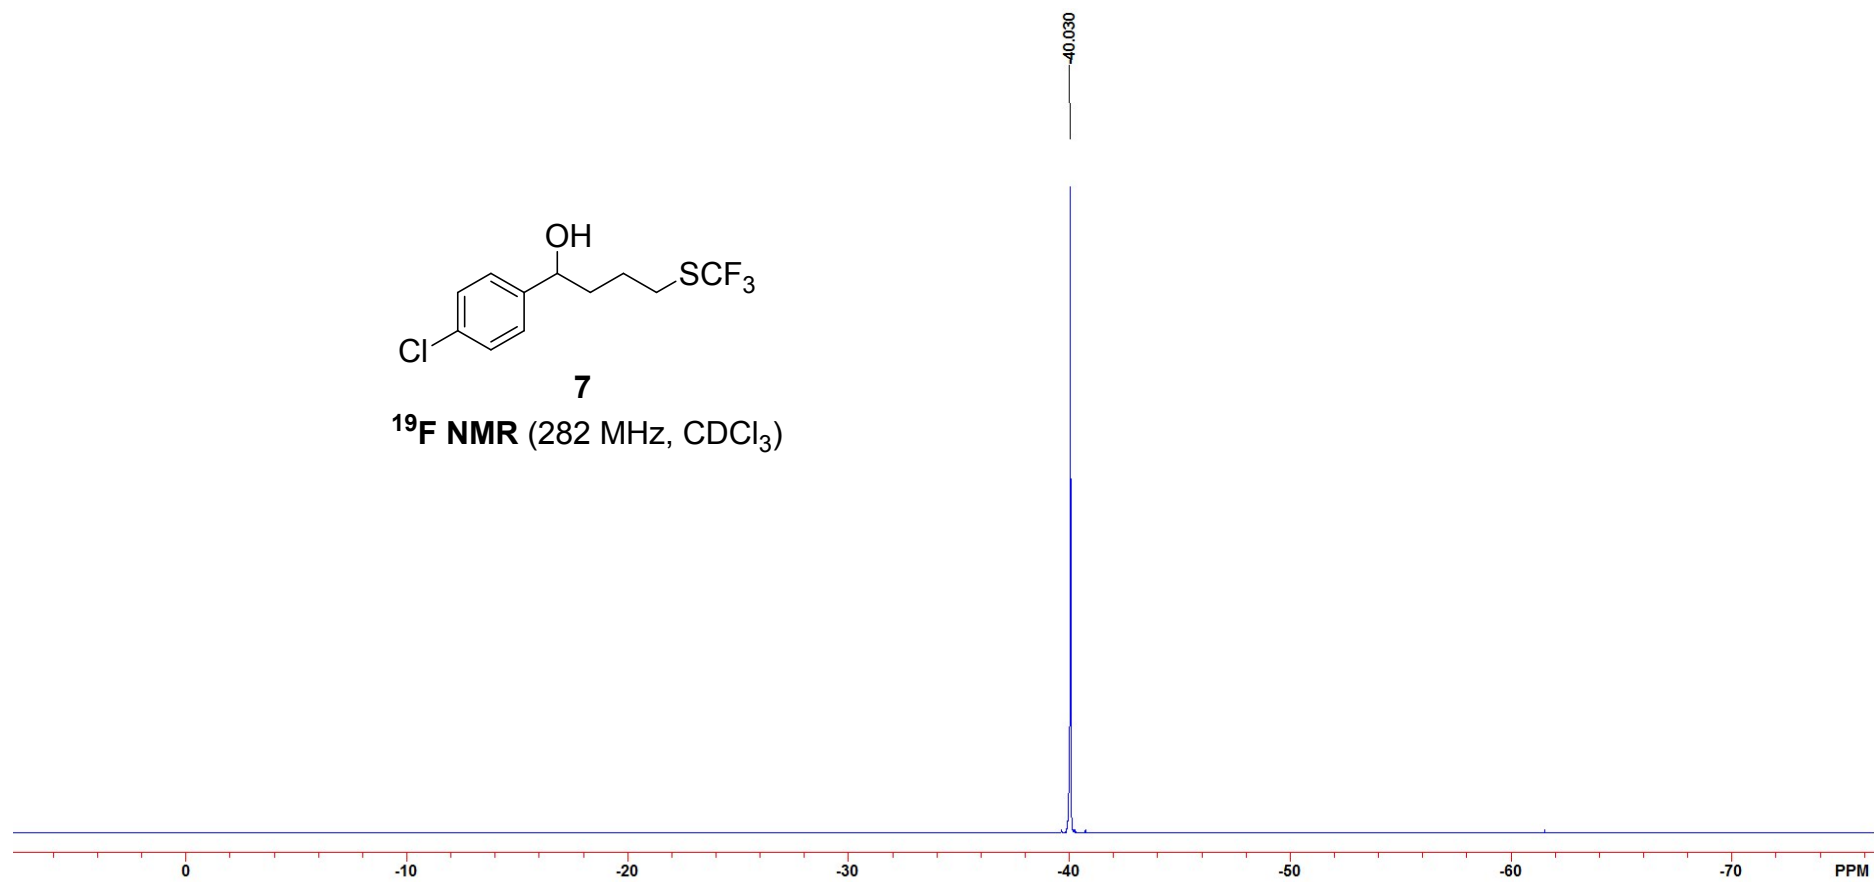

Supplement: c6ra11968a1.pdf [file c6ra11968a1.pdf]
